# Supplementary material
Source: PubMed Central journal article supplement (PMC2872475)
Supplement: NIHMS192937-supplement-Figs_1-5__Table_1.pdf [file NIHMS192937-supplement-Figs_1-5__Table_1.pdf]

## SUPPLEMENTARY INFORMATION

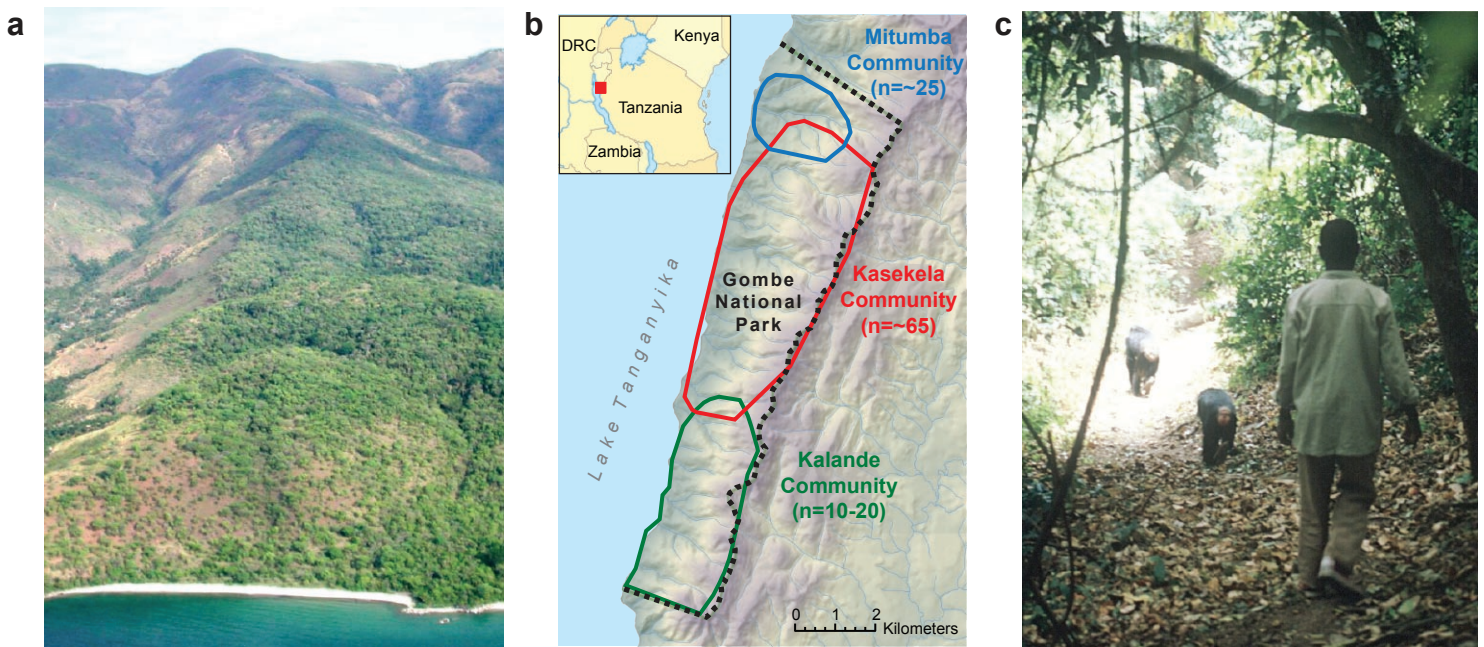

**Supplementary Figure 1. Studies of wild chimpanzees in Gombe National Park.** **a**, Aerial view of the northern border of the park from Lake Tanganyika depicting extensive deforestation outside the protected area (photograph courtesy of John MacLachlan, The Jane Goodall Institute). **b**, Approximate ranges of the northern Mitumba (blue), the central Kasekela (red), and the southern Kalande (green) communities in relation to park boundaries (black); the inset depicts the location of Gombe National Park (red square) within Tanzania (map courtesy of Lilian Pintea, The Jane Goodall Institute). **c**, Daily observation of habituated chimpanzees in Gombe (photograph courtesy of Magdalena Lukasik, The Jane Goodall Institute).

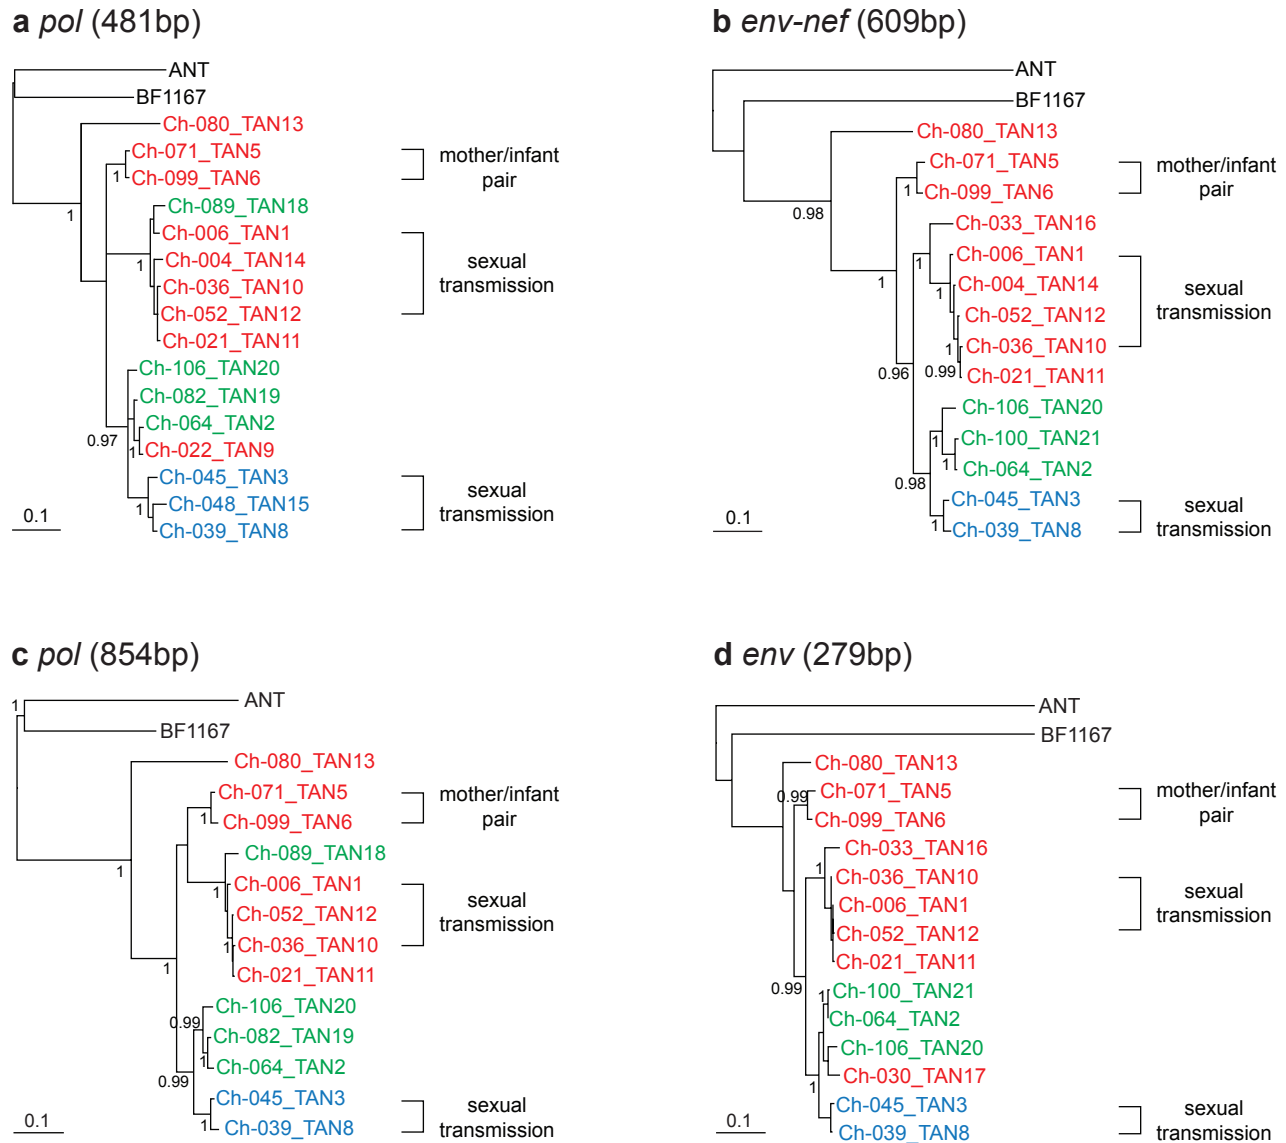

**Supplementary Figure 2. Phylogeny of SIVcpz in Gombe.** **a-d**, Evolutionary trees were constructed from **(a)** 481-bp *pol*, **(b)** 609-bp *env-nef*, **(c)** 854-bp *pol* and **(d)** 279-bp *env* (gp41 region) sequences, using SIVcpz*Pts* strains from the Democratic Republic of Congo (ANT and BF1167) as outgroups. Viruses infecting members of the Mitumba, Kasekela and Kalande communities are shown in blue, red and green, respectively (GenBank accession numbers are provided in Supplementary Table 1). Trees were inferred by Bayesian<sup>28</sup> **(a, b)** and maximum likelihood<sup>34</sup> **(c, d)** methods; numbers on nodes are posterior probabilities (only values above 0.95 are shown). The scale bar represents 0.1 substitutions per site. Brackets indicate suspected sexual and vertical transmission clusters (note that Ch-021 was most likely infected through aggression; Supplementary Table 2).

Supplementary Figure 3a.

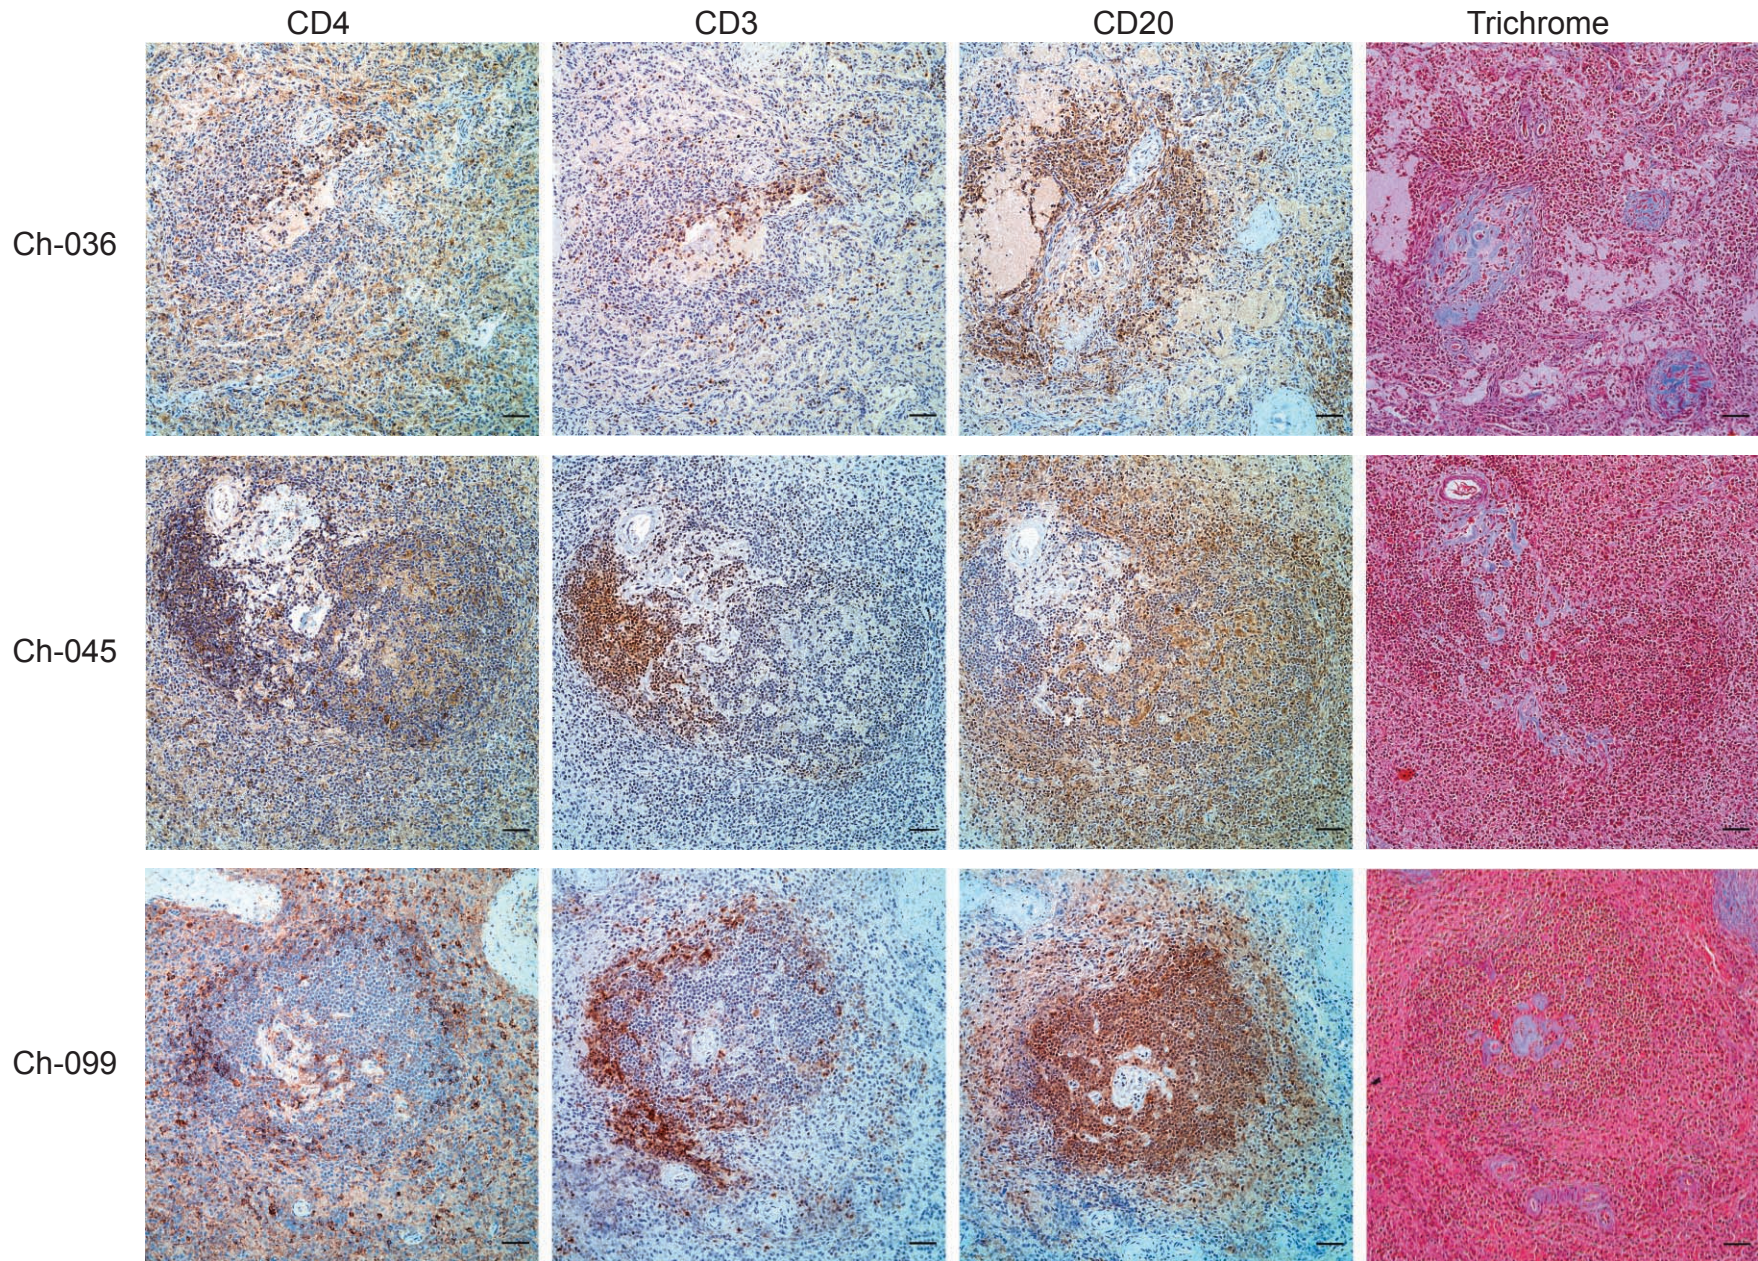

Supplementary Figure 3b.

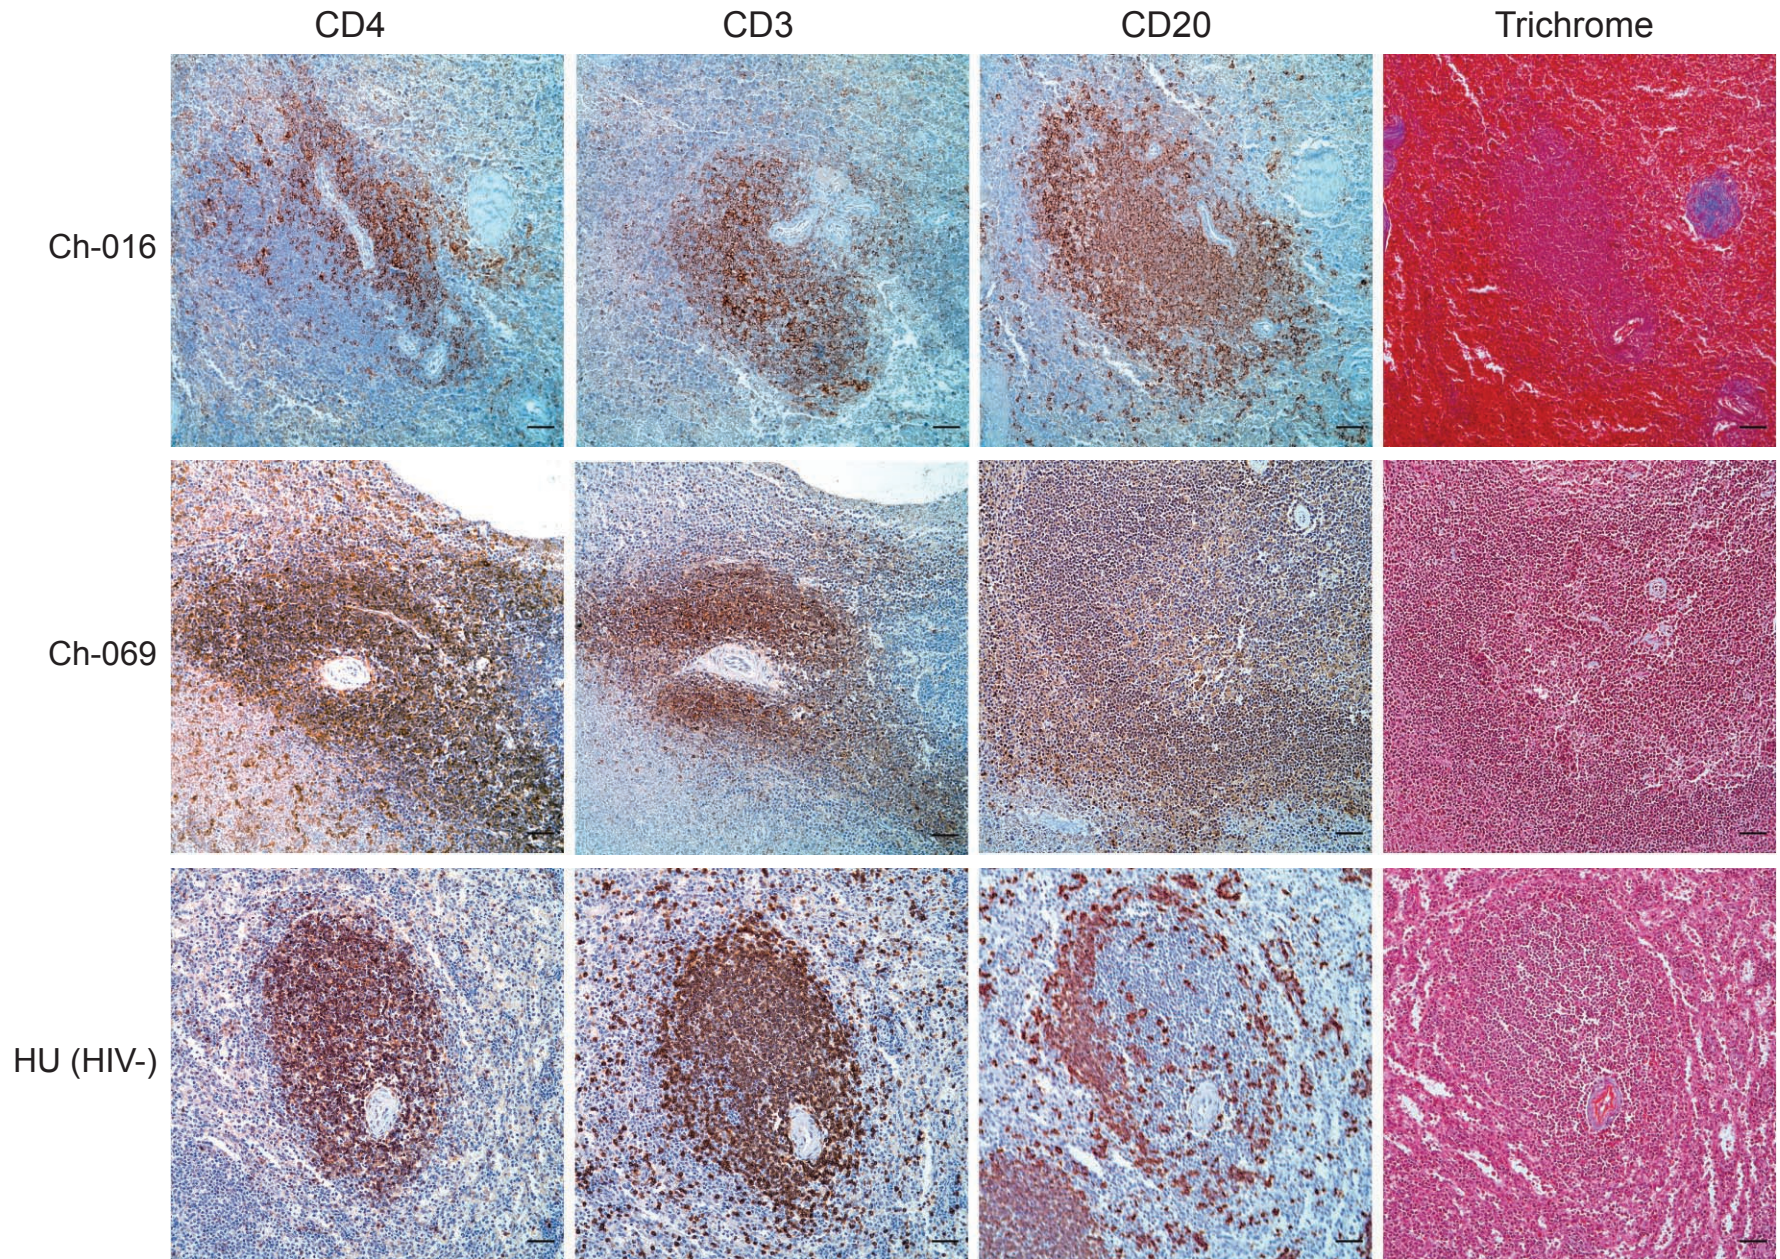

**Supplementary Figure 3. CD4+ T cell depletion and collagen deposition in the spleen of SIVcpz infected chimpanzees.** **a, b,** Representative images of CD4 (T helper cells), CD3 (pan T cells), CD20 (B cells) and Trichrome (collagen) stained spleen sections are shown for **(a)** three SIVcpz infected chimpanzees (Ch-036, Ch-045 and Ch-099), as well as **(b)** two uninfected chimpanzees (Ch-016, Ch-069) and one normal human (Hu HIV-) control. Each row represents consecutive sections of the same periarteriolar lymphoid sheath (PALS) region (the scale bar indicates 50  $\mu$ m). In sections stained with CD4, CD3 and CD20 antibodies, positive cells are dark brown (cell nuclei are blue). In Masson's Trichrome stained sections, collagen is dark blue (cytoplasm and nuclei are red-magenta). Note the varying degrees of CD4+ T cell depletion and associated collagen deposition in Ch-036 (severe), Ch-045 (intermediate) and Ch-099 (minor), and the fact that the CD4+ T cell loss in Ch-045 and Ch-099 occurred in the absence of a concomitant depletion of other CD3+ T cell and B cell populations.

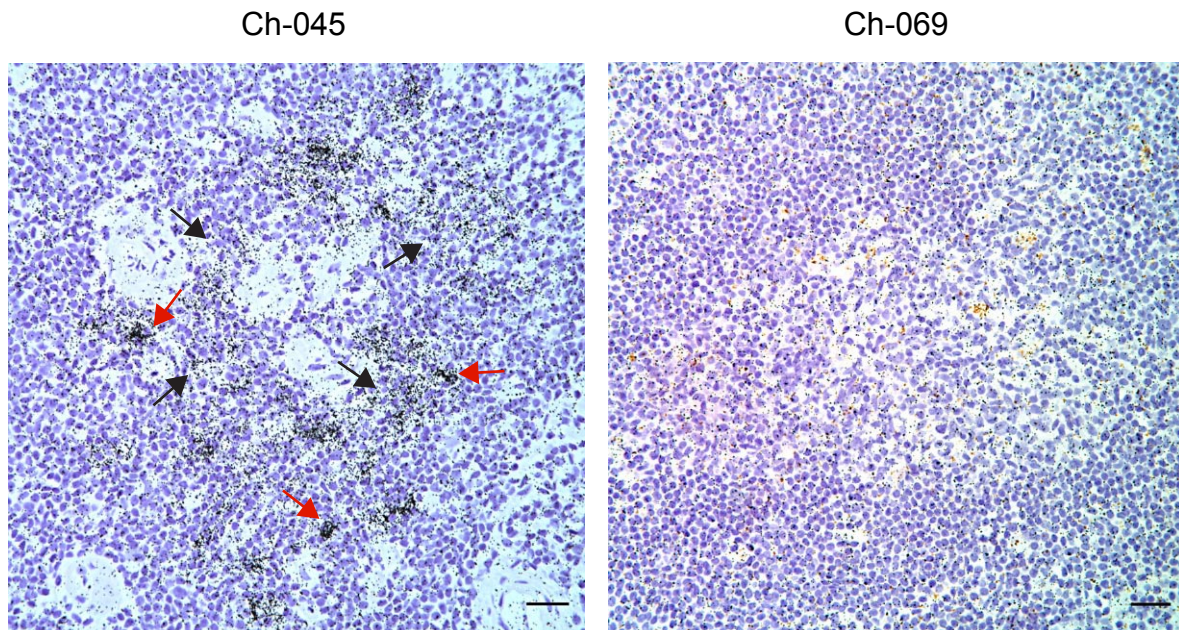

**Supplementary Figure 4. SIVcpz replication *in vivo*.** Spleen sections from an SIVcpz infected (Ch-045) and uninfected (Ch-069) chimpanzee were subjected to *in situ* hybridization (ISH) using <sup>35</sup>S-labelled SIVcpzP<sub>ts</sub> specific RNA riboprobes. SIVcpz RNA is shown as black silver grains (nuclei are stained blue). Red arrows highlight individual cells that express copious amounts of viral RNA (areas of very dense silver grains); black arrows indicate extensive trapping of virus particles by follicular dendritic cells (areas of more diffuse silver grains). Note that ISH also identified a few productively infected cells in the spleen of Ch-036, but not Ch-099 (possibly due to partial tissue degradation). Original magnification 400x (the scale bar is 25 μm).

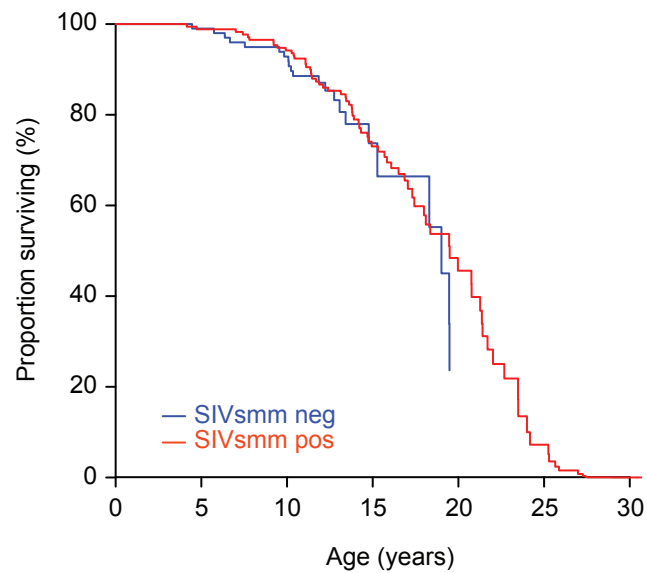

**Supplementary Figure 5. SIVsmm associated mortality in captive sooty mangabeys.** Kaplan-Meier survival curves are shown for SIVsmm infected (n=167; red) and uninfected (n=62; blue) sooty mangabeys housed at the Yerkes National Primate Research Center. The mortality rates of the two groups do not differ significantly ( $p=0.55$ ). The proportion of surviving sooty mangabeys is shown in relation to their age in years.





| Individual <sup>1</sup> | Sex <sup>2</sup> | Community <sup>3</sup> | Sample type | Sample Code | Collection Date <sup>4</sup> | mtDNA haplotype <sup>5</sup> | Microsatellite Loci <sup>6</sup> |         |         |         | urine WB <sup>7</sup> | fecal WB | fecal vRNA <sup>8</sup> | GenBank accession numbers <sup>9</sup> |          | SIVcpz Strain                      | Birth and Death Dates with Immigration Notes <sup>10</sup>           |         |         |         |     |     |
|-------------------------|------------------|------------------------|-------------|-------------|------------------------------|------------------------------|----------------------------------|---------|---------|---------|-----------------------|----------|-------------------------|----------------------------------------|----------|------------------------------------|----------------------------------------------------------------------|---------|---------|---------|-----|-----|
|                         |                  |                        |             |             |                              |                              | D18s536                          | D4s243  | D10s676 | D9s922  |                       |          |                         | pol                                    | gp41/nef |                                    |                                                                      |         |         |         |     |     |
| Ch-004<br>(Con't)       |                  | KK                     | fecal       | 1162        | 10-Feb-07                    | 6                            | 141/161                          | 200/235 | 182/182 | 286/302 |                       | pos      |                         |                                        |          |                                    |                                                                      |         |         |         |     |     |
|                         |                  |                        | fecal       | 1187        | 17-Mar-07                    |                              | 141/161                          | 200/235 | 182/182 | 286/302 |                       | pos      |                         |                                        |          |                                    |                                                                      |         |         |         |     |     |
|                         |                  |                        | fecal       | 1233        | 11-Sep-07                    |                              | 141/161                          | 200/235 | 182/182 | 286/302 |                       | pos      |                         |                                        |          |                                    |                                                                      |         |         |         |     |     |
|                         |                  |                        | fecal       | 1371        | 17-Apr-08                    |                              | 141/161                          | 200/235 | 182/182 | 286/302 |                       | pos      |                         |                                        |          |                                    |                                                                      |         |         |         |     |     |
|                         |                  |                        | fecal       | 1375        | 17-Apr-08                    |                              | 141/161                          | 200/235 | 182/182 | 286/302 |                       | pos      |                         |                                        |          |                                    |                                                                      |         |         |         |     |     |
| Ch-005                  | M                | KK                     | fecal       | 56          | 16-Dec-01                    | 6                            | 141/157                          | 196/200 | 182/194 | 302/302 |                       | neg      |                         |                                        |          |                                    | DOB (22-May-71)                                                      |         |         |         |     |     |
|                         |                  |                        | fecal       | 55          | 18-Dec-01                    |                              | neg                              |         |         |         |                       |          |                         |                                        |          |                                    |                                                                      |         |         |         |     |     |
|                         |                  |                        | fecal       | 89          | 6-Feb-02                     |                              | neg                              |         |         |         |                       |          |                         |                                        |          |                                    |                                                                      |         |         |         |     |     |
|                         |                  |                        | urine       | u91         | 3-Apr-02                     |                              | neg                              |         |         |         |                       |          |                         |                                        |          |                                    |                                                                      |         |         |         |     |     |
|                         |                  |                        | urine       | u92         | 4-May-02                     |                              | neg                              |         |         |         |                       |          |                         |                                        |          |                                    |                                                                      |         |         |         |     |     |
|                         |                  |                        | fecal       | 330         | 20-Aug-03                    |                              | neg                              |         |         |         |                       |          |                         |                                        |          |                                    |                                                                      |         |         |         |     |     |
|                         |                  |                        | fecal       | 324         | 27-Aug-03                    |                              | neg                              |         |         |         |                       |          |                         |                                        |          |                                    |                                                                      |         |         |         |     |     |
|                         |                  |                        | urine       | u718        | 21-Dec-03                    |                              | neg                              |         |         |         |                       |          |                         |                                        |          |                                    |                                                                      |         |         |         |     |     |
|                         |                  |                        | fecal       | 375         | 26-Mar-04                    |                              | 141/157                          | 196/200 | 182/194 | 302/302 |                       | neg      |                         |                                        |          |                                    |                                                                      |         |         |         |     |     |
|                         |                  |                        | fecal       | 376         | 1-May-04                     |                              | neg                              |         |         |         |                       |          |                         |                                        |          |                                    |                                                                      |         |         |         |     |     |
|                         |                  |                        | fecal       | 377         | 21-May-04                    |                              | neg                              |         |         |         |                       |          |                         |                                        |          |                                    |                                                                      |         |         |         |     |     |
|                         |                  |                        | fecal       | 634         | 29-Jul-04                    |                              | neg                              |         |         |         |                       |          |                         |                                        |          |                                    |                                                                      |         |         |         |     |     |
|                         |                  |                        | fecal       | 967         | 23-Dec-04                    |                              | neg                              |         |         |         |                       |          |                         |                                        |          |                                    |                                                                      |         |         |         |     |     |
|                         |                  |                        | fecal       | 966         | 5-Nov-05                     |                              | neg                              |         |         |         |                       |          |                         |                                        |          |                                    |                                                                      |         |         |         |     |     |
|                         |                  |                        | fecal       | 1096        | 20-Jul-06                    |                              | neg                              |         |         |         |                       |          |                         |                                        |          |                                    |                                                                      |         |         |         |     |     |
|                         |                  |                        | fecal       | 1174        | 5-Mar-07                     |                              | 141/157                          | 196/200 | 182/194 | 302/302 |                       | neg      |                         |                                        |          |                                    |                                                                      |         |         |         |     |     |
|                         |                  |                        | fecal       | 1234        | 27-Oct-07                    |                              | neg                              |         |         |         |                       |          |                         |                                        |          |                                    |                                                                      |         |         |         |     |     |
|                         |                  |                        | fecal       | 1227        | 28-Oct-07                    |                              | neg                              |         |         |         |                       |          |                         |                                        |          |                                    |                                                                      |         |         |         |     |     |
|                         |                  |                        | fecal       | 1228        | 31-Oct-07                    |                              | neg                              |         |         |         |                       |          |                         |                                        |          |                                    |                                                                      |         |         |         |     |     |
|                         |                  |                        | fecal       | 1226        | 20-Nov-07                    |                              | neg                              |         |         |         |                       |          |                         |                                        |          |                                    |                                                                      |         |         |         |     |     |
| fecal                   | 1337             | 16-Apr-08              | 141/157     | 196/200     | 182/194                      | 302/302                      | neg                              |         |         |         |                       |          |                         |                                        |          |                                    |                                                                      |         |         |         |     |     |
| fecal                   | 1501             | 15-Oct-08              | 141/157     | 196/200     | 182/194                      | 302/302                      | neg                              |         |         |         |                       |          |                         |                                        |          |                                    |                                                                      |         |         |         |     |     |
| na                      | 6                | na                     | 6           | na          | na                           | na                           | na                               | neg     |         |         |                       |          |                         |                                        |          |                                    |                                                                      |         |         |         |     |     |
| Ch-006                  | M                | KK                     | fecal       | 14          | 9-Nov-00                     | 1                            |                                  |         |         |         |                       | pos      | AF447763                | AF447763                               | TAN1     | DOB (21-Oct-77)<br>DLS (23-Jan-07) |                                                                      |         |         |         |     |     |
|                         |                  |                        | fecal       | 4           | 13-Nov-00                    |                              |                                  |         |         |         |                       | pos      |                         |                                        |          |                                    |                                                                      |         |         |         |     |     |
|                         |                  |                        | fecal       | 17          | 18-Nov-00                    |                              |                                  |         |         |         |                       | pos (FL) |                         |                                        |          |                                    |                                                                      |         |         |         |     |     |
|                         |                  |                        | fecal       | 79          | 18-Dec-01                    |                              |                                  |         |         |         |                       | pos (FL) |                         |                                        |          |                                    |                                                                      |         |         |         |     |     |
|                         |                  |                        | fecal       | 73          | 23-Dec-01                    |                              |                                  |         |         |         |                       | neg      |                         |                                        |          |                                    |                                                                      |         |         |         |     |     |
|                         |                  |                        | fecal       | 99          | 3-Jan-02                     |                              |                                  |         |         |         |                       | pos      |                         |                                        |          |                                    |                                                                      |         |         |         |     |     |
|                         |                  |                        | fecal       | 93          | 11-Jan-02                    |                              |                                  |         |         |         |                       | pos      |                         |                                        |          |                                    |                                                                      |         |         |         |     |     |
|                         |                  |                        | urine       | u77         | 11-Apr-02                    |                              |                                  |         |         |         |                       | pos      |                         |                                        |          |                                    |                                                                      |         |         |         |     |     |
|                         |                  |                        | urine       | u78         | 28-Apr-02                    |                              |                                  |         |         |         |                       | pos      |                         |                                        |          |                                    |                                                                      |         |         |         |     |     |
|                         |                  |                        | fecal       | 329         | 20-Aug-03                    |                              |                                  |         |         |         |                       | 1        |                         |                                        |          |                                    | 141/161                                                              | 204/235 | 190/190 | 302/302 | pos | neg |
|                         |                  |                        | fecal       | 415         | 9-Apr-04                     |                              |                                  |         |         |         |                       | pos      |                         |                                        |          |                                    |                                                                      |         |         |         |     |     |
|                         |                  |                        | fecal       | 411         | 28-Apr-04                    |                              |                                  |         |         |         |                       | pos      |                         |                                        |          |                                    |                                                                      |         |         |         |     |     |
|                         |                  |                        | fecal       | 412         | 13-May-04                    |                              |                                  |         |         |         |                       | pos      |                         |                                        |          |                                    |                                                                      |         |         |         |     |     |
|                         |                  |                        | fecal       | 413         | 12-Jul-04                    |                              |                                  |         |         |         |                       | pos      |                         |                                        |          |                                    |                                                                      |         |         |         |     |     |
|                         |                  |                        | fecal       | 414         | 16-Jul-04                    |                              |                                  |         |         |         |                       | pos      |                         |                                        |          |                                    |                                                                      |         |         |         |     |     |
|                         |                  |                        | fecal       | 794         | 9-Jul-05                     |                              |                                  |         |         |         |                       | pos      |                         |                                        |          |                                    |                                                                      |         |         |         |     |     |
|                         |                  |                        | fecal       | 981         | 5-Nov-05                     |                              |                                  |         |         |         |                       | 1        |                         |                                        |          |                                    | 141/161                                                              | 204/235 | 190/190 | 302/302 | pos |     |
| Ch-007                  | M                | KK                     | fecal       | 71          | 11-Jan-01                    | 2                            | 141/141                          | 196/235 | 158/190 | 298/298 |                       | neg      |                         |                                        |          |                                    | DOB (3-Feb-79)                                                       |         |         |         |     |     |
|                         |                  |                        | fecal       | 95          | 30-Dec-01                    |                              | 141/141                          | 196/235 | 158/190 | 298/298 |                       | neg      |                         |                                        |          |                                    |                                                                      |         |         |         |     |     |
|                         |                  |                        | fecal       | 58          | 4-Jan-02                     |                              | 141/141                          | 196/235 | 158/190 | 298/298 |                       | neg      |                         |                                        |          |                                    |                                                                      |         |         |         |     |     |
|                         |                  |                        | urine       | u75         | 26-Mar-02                    |                              | neg                              |         |         |         |                       |          |                         |                                        |          |                                    |                                                                      |         |         |         |     |     |
|                         |                  |                        | urine       | u76         | 25-Apr-02                    |                              | neg                              |         |         |         |                       |          |                         |                                        |          |                                    |                                                                      |         |         |         |     |     |
|                         |                  |                        | urine       | u701        | 20-Jun-03                    |                              | neg                              |         |         |         |                       |          |                         |                                        |          |                                    |                                                                      |         |         |         |     |     |
|                         |                  |                        | urine       | u705        | 23-Sep-03                    |                              | neg                              |         |         |         |                       |          |                         |                                        |          |                                    |                                                                      |         |         |         |     |     |
|                         |                  |                        | fecal       | 369         | 29-May-04                    |                              | neg                              |         |         |         |                       |          |                         |                                        |          |                                    |                                                                      |         |         |         |     |     |
|                         |                  |                        | fecal       | 606         | 10-Sep-04                    |                              | neg                              |         |         |         |                       |          |                         |                                        |          |                                    |                                                                      |         |         |         |     |     |
|                         |                  |                        | fecal       | 607         | 12-Dec-04                    |                              | 141/141                          | 196/235 | 158/190 | 298/298 |                       | neg      |                         |                                        |          |                                    |                                                                      |         |         |         |     |     |
|                         |                  |                        | fecal       | 711         | 23-May-05                    |                              | 141/141                          | 196/235 | 158/190 | 298/298 |                       | neg      |                         |                                        |          |                                    |                                                                      |         |         |         |     |     |
|                         |                  |                        | fecal       | 951         | 15-Jan-06                    |                              | 141/141                          | 196/235 | 158/190 | 298/298 |                       | neg      |                         |                                        |          |                                    |                                                                      |         |         |         |     |     |
|                         |                  |                        | fecal       | 1359        | 22-Jan-07                    |                              | 141/141                          | 196/235 | 158/190 | 298/298 |                       | neg      |                         |                                        |          |                                    |                                                                      |         |         |         |     |     |
| fecal                   | 1398             | 10-May-08              | 141/141     | 196/235     | 158/190                      | 298/298                      | neg                              |         |         |         |                       |          |                         |                                        |          |                                    |                                                                      |         |         |         |     |     |
| Ch-008                  | M                | KK                     | fecal       | 19          | 21-Nov-00                    | 2                            | 141/157                          | 200/204 | 190/190 | 302/302 |                       | neg      |                         |                                        |          |                                    | DOB (2-Jul-69)*<br>DLS (6-Nov-02)<br>First arrived in KK (21-Dec-73) |         |         |         |     |     |
|                         |                  |                        | urine       | u14         | 7-Jan-01                     |                              | neg                              |         |         |         |                       |          |                         |                                        |          |                                    |                                                                      |         |         |         |     |     |
|                         |                  |                        | urine       | u308        | 29-Jun-01                    |                              | neg                              |         |         |         |                       |          |                         |                                        |          |                                    |                                                                      |         |         |         |     |     |
|                         |                  |                        | urine       | u619        | 20-Oct-01                    |                              | neg                              |         |         |         |                       |          |                         |                                        |          |                                    |                                                                      |         |         |         |     |     |
|                         |                  |                        | fecal       | 63          | 12-Dec-01                    |                              | neg                              |         |         |         |                       |          |                         |                                        |          |                                    |                                                                      |         |         |         |     |     |
|                         |                  |                        | fecal       | 67          | 16-Dec-01                    |                              | 141/157                          | 200/204 | 190/190 | 302/302 |                       | neg      |                         |                                        |          |                                    |                                                                      |         |         |         |     |     |
|                         |                  |                        | urine       | u84         | 24-Feb-02                    |                              | neg                              |         |         |         |                       |          |                         |                                        |          |                                    |                                                                      |         |         |         |     |     |
|                         |                  |                        | urine       | u85         | 3-May-02                     |                              | neg                              |         |         |         |                       |          |                         |                                        |          |                                    |                                                                      |         |         |         |     |     |
|                         |                  |                        | fecal       | 181         | 4-May-02                     |                              | 141/157                          | 200/204 | 190/190 | 302/302 |                       | neg      |                         |                                        |          |                                    |                                                                      |         |         |         |     |     |
|                         |                  |                        | na          | 5           | na                           |                              | 2                                | na      | na      | na      |                       | na       |                         |                                        |          |                                    |                                                                      | neg     |         |         |     |     |
| Ch-009                  | F                | KK                     | fecal       | 2           | 7-Nov-00                     | 6                            | 141/173                          | 196/200 | 190/194 | 302/306 |                       | neg      |                         |                                        |          |                                    | DOB (19-Mar-81)                                                      |         |         |         |     |     |
|                         |                  |                        | fecal       | 8           | 11-Nov-00                    |                              | neg                              |         |         |         |                       |          |                         |                                        |          |                                    |                                                                      |         |         |         |     |     |
|                         |                  |                        | urine       | u9          | 19-Jun-01                    |                              | neg                              |         |         |         |                       |          |                         |                                        |          |                                    |                                                                      |         |         |         |     |     |
|                         |                  |                        | urine       | u288        | 27-Jun-01                    |                              | neg                              |         |         |         |                       |          |                         |                                        |          |                                    |                                                                      |         |         |         |     |     |
|                         |                  |                        | fecal       | 81          | 20-Dec-01                    |                              | neg                              |         |         |         |                       |          |                         |                                        |          |                                    |                                                                      |         |         |         |     |     |
|                         |                  |                        | fecal       | 46          | 24-Dec-01                    |                              | neg                              |         |         |         |                       |          |                         |                                        |          |                                    |                                                                      |         |         |         |     |     |
|                         |                  |                        | urine       | u128        | 19-Feb-02                    |                              | neg                              |         |         |         |                       |          |                         |                                        |          |                                    |                                                                      |         |         |         |     |     |
|                         |                  |                        | urine       | u129        | 24-Feb-02                    |                              | neg                              |         |         |         |                       |          |                         |                                        |          |                                    |                                                                      |         |         |         |     |     |
|                         |                  |                        | urine       | u65         | 16-Mar-02                    |                              | neg                              |         |         |         |                       |          |                         |                                        |          |                                    |                                                                      |         |         |         |     |     |
|                         |                  |                        | urine       | u130        | 16-Mar-02                    |                              | neg                              |         |         |         |                       |          |                         |                                        |          |                                    |                                                                      |         |         |         |     |     |
|                         |                  |                        | urine       | u66         | 18-Mar-02                    |                              | neg                              |         |         |         |                       |          |                         |                                        |          |                                    |                                                                      |         |         |         |     |     |
|                         |                  |                        | urine       | u230        | 15-Jul-02                    |                              | neg                              |         |         |         |                       |          |                         |                                        |          |                                    |                                                                      |         |         |         |     |     |
|                         |                  |                        | urine       | u229        | 20-Jul-02                    |                              | neg                              |         |         |         |                       |          |                         |                                        |          |                                    |                                                                      |         |         |         |     |     |
|                         |                  |                        | urine       | u228        | 29-Sep-02                    |                              | neg                              |         |         |         |                       |          |                         |                                        |          |                                    |                                                                      |         |         |         |     |     |
|                         |                  |                        | urine       | u227        | 14-Dec-02                    |                              | neg                              |         |         |         |                       |          |                         |                                        |          |                                    |                                                                      |         |         |         |     |     |
| fecal                   | 338              | 7-Aug-03               | 141/173     | 196/200     | 190/194                      | 302/306                      | neg                              |         |         |         |                       |          |                         |                                        |          |                                    |                                                                      |         |         |         |     |     |
| urine                   | u535             | 30-Oct-03              | neg         |             |                              |                              |                                  |         |         |         |                       |          |                         |                                        |          |                                    |                                                                      |         |         |         |     |     |



| Individual <sup>1</sup> | Sex <sup>2</sup> | Community <sup>3</sup> | Sample type | Sample Code | Collection Date <sup>4</sup> | mtDNA haplotype <sup>5</sup> | Microsatellite Loci <sup>6</sup> |           |         |         | urine WB <sup>7</sup> | fecal WB | fecal vRNA <sup>8</sup> | GenBank accession numbers <sup>9</sup> |                 | SIVcpz Strain                     | Birth and Death Dates with Immigration Notes <sup>10</sup> |         |         |     |     |  |  |
|-------------------------|------------------|------------------------|-------------|-------------|------------------------------|------------------------------|----------------------------------|-----------|---------|---------|-----------------------|----------|-------------------------|----------------------------------------|-----------------|-----------------------------------|------------------------------------------------------------|---------|---------|-----|-----|--|--|
|                         |                  |                        |             |             |                              |                              | D18s536                          | D4s243    | D10s676 | D9s922  |                       |          |                         | <i>pol</i>                             | <i>gp41/nef</i> |                                   |                                                            |         |         |     |     |  |  |
| Ch-013<br>(Con't)       |                  | KK                     | fecal       | 265         | 2-Mar-03                     |                              | 141/173                          | 200/204   | 182/194 | 302/302 | neg                   | neg      |                         |                                        |                 |                                   |                                                            |         |         |     |     |  |  |
|                         |                  |                        | urine       | u383        | 30-Apr-03                    |                              |                                  |           |         |         |                       |          |                         |                                        |                 |                                   |                                                            |         |         |     |     |  |  |
|                         |                  |                        | urine       | u717        | 18-Dec-03                    |                              |                                  |           |         |         |                       |          |                         |                                        |                 |                                   |                                                            |         |         |     |     |  |  |
|                         |                  |                        | fecal       | 397         | 30-Jan-04                    |                              |                                  |           |         |         |                       |          |                         |                                        |                 |                                   |                                                            |         |         |     |     |  |  |
|                         |                  |                        | fecal       | 400         | 8-Jun-04                     |                              |                                  |           |         |         |                       |          |                         |                                        |                 |                                   |                                                            |         |         |     |     |  |  |
|                         |                  |                        | fecal       | 398         | 16-Jun-04                    |                              |                                  |           |         |         |                       |          |                         |                                        |                 |                                   |                                                            |         |         |     |     |  |  |
|                         |                  |                        | fecal       | 399         | 27-Jun-04                    |                              |                                  |           |         |         |                       |          |                         |                                        |                 |                                   |                                                            |         |         |     |     |  |  |
|                         |                  |                        | fecal       | 637         | 24-Jul-04                    |                              |                                  |           |         |         |                       |          |                         |                                        |                 |                                   |                                                            |         |         |     |     |  |  |
|                         |                  |                        | fecal       | 724         | 7-May-05                     |                              |                                  |           |         |         |                       |          |                         |                                        |                 |                                   |                                                            |         |         |     |     |  |  |
|                         |                  |                        | fecal       | 978         | 1-Nov-05                     |                              |                                  |           |         |         |                       |          |                         |                                        |                 |                                   |                                                            |         |         |     |     |  |  |
|                         |                  |                        | fecal       | 979         | 18-May-06                    |                              | 141/173                          | 200/204   | 182/194 | 302/302 |                       |          |                         |                                        |                 |                                   |                                                            |         |         |     |     |  |  |
| fecal                   | 1238             | 28-Jun-07              | 141/173     | 200/204     | 182/194                      | 302/302                      |                                  |           |         |         |                       |          |                         |                                        |                 |                                   |                                                            |         |         |     |     |  |  |
| fecal                   | 1453             | 20-Nov-08              | 141/173     | 200/204     | 182/194                      | 302/302                      |                                  |           |         |         |                       |          |                         |                                        |                 |                                   |                                                            |         |         |     |     |  |  |
| Ch-014                  | M                | KK                     | fecal       | 166         | 28-Jul-02                    | 6                            | 141/161                          | 196/200   | 186/190 | 290/306 | neg                   | neg      |                         |                                        |                 | DOB (27-May-00)                   |                                                            |         |         |     |     |  |  |
|                         |                  |                        | urine       | u190        | 28-Jul-02                    |                              |                                  |           |         |         |                       |          |                         |                                        |                 |                                   |                                                            |         |         |     |     |  |  |
|                         |                  |                        | fecal       | 401         | 6-Jul-04                     |                              |                                  |           |         |         |                       |          |                         |                                        |                 |                                   |                                                            |         |         |     |     |  |  |
|                         |                  |                        | fecal       | 639         | 22-Sep-04                    |                              |                                  |           |         |         |                       |          |                         |                                        |                 |                                   |                                                            |         |         |     |     |  |  |
|                         |                  |                        | fecal       | 976         | 26-Dec-04                    |                              |                                  |           |         |         |                       |          |                         |                                        |                 |                                   |                                                            |         |         |     |     |  |  |
|                         |                  |                        | fecal       | 719         | 4-May-05                     | 6                            | 141/161                          | 196/200   | 186/190 | 290/306 |                       |          |                         |                                        |                 |                                   |                                                            |         |         |     |     |  |  |
|                         |                  |                        | fecal       | 789         | 12-Sep-05                    |                              |                                  |           |         |         |                       |          |                         |                                        |                 |                                   |                                                            |         |         |     |     |  |  |
|                         |                  |                        | fecal       | 858         | 29-Oct-05                    | 6                            | 141/161                          | 196/200   | 186/190 | 290/306 |                       |          |                         |                                        |                 |                                   |                                                            |         |         |     |     |  |  |
|                         |                  |                        | fecal       | 975         | 12-Mar-06                    | 6                            | 141/161                          | 196/200   | 186/190 | 290/306 |                       |          |                         |                                        |                 |                                   |                                                            |         |         |     |     |  |  |
|                         |                  |                        | fecal       | 1100        | 17-Aug-06                    |                              |                                  |           |         |         |                       |          |                         |                                        |                 |                                   |                                                            |         |         |     |     |  |  |
|                         |                  |                        | fecal       | 1186        | 16-Mar-07                    | 141/161                      | 196/200                          | 186/190   | 290/306 |         |                       |          |                         |                                        |                 |                                   |                                                            |         |         |     |     |  |  |
|                         |                  |                        | fecal       | 1412        | 17-May-08                    | 141/161                      | 196/200                          | 186/190   | 290/306 |         |                       |          |                         |                                        |                 |                                   |                                                            |         |         |     |     |  |  |
|                         |                  |                        | fecal       | 1500        | 21-Oct-08                    | 141/161                      | 196/200                          | 186/190   | 290/306 |         |                       |          |                         |                                        |                 |                                   |                                                            |         |         |     |     |  |  |
|                         |                  |                        | Ch-015      | F           | KK                           | fecal                        | 49                               | 20-Dec-01 | 1       | 141/161 |                       |          |                         |                                        |                 |                                   | 235/235                                                    | 182/190 | 286/298 | neg | neg |  |  |
| fecal                   | 78               | 30-Dec-01              |             |             |                              | 1                            |                                  |           |         |         |                       |          |                         |                                        |                 |                                   |                                                            |         |         |     |     |  |  |
| urine                   | u38              | 13-Mar-02              |             |             |                              | 1                            | 141/161                          | 235/235   | 182/190 | 286/298 | neg                   |          |                         |                                        |                 |                                   |                                                            |         |         |     |     |  |  |
| urine                   | u48              | 13-Mar-02              |             |             |                              |                              |                                  |           |         |         |                       |          |                         |                                        |                 |                                   |                                                            |         |         |     |     |  |  |
| urine                   | u132             | 11-Apr-02              |             |             |                              |                              |                                  |           |         |         |                       | neg      |                         |                                        |                 |                                   |                                                            |         |         |     |     |  |  |
| urine                   | u141             | 13-May-02              |             |             |                              |                              |                                  |           |         |         |                       | neg      |                         |                                        |                 |                                   |                                                            |         |         |     |     |  |  |
| urine                   | u237             | 30-Jun-02              |             |             |                              |                              |                                  |           |         |         |                       | neg      |                         |                                        |                 |                                   |                                                            |         |         |     |     |  |  |
| urine                   | u234             | 6-Aug-02               |             |             |                              |                              |                                  |           |         |         |                       | neg      |                         |                                        |                 |                                   |                                                            |         |         |     |     |  |  |
| urine                   | u235             | 8-Sep-02               |             |             |                              |                              |                                  |           |         |         |                       | neg      |                         |                                        |                 |                                   |                                                            |         |         |     |     |  |  |
| urine                   | u236             | 15-Sep-02              |             |             |                              |                              |                                  |           |         |         |                       | neg      |                         |                                        |                 |                                   |                                                            |         |         |     |     |  |  |
| urine                   | u594             | 14-Jan-03              |             |             |                              |                              |                                  |           |         |         |                       | neg      |                         |                                        |                 |                                   |                                                            |         |         |     |     |  |  |
| urine                   | u350             | 21-May-03              |             |             |                              |                              |                                  |           |         |         |                       | neg      |                         |                                        |                 |                                   |                                                            |         |         |     |     |  |  |
| fecal                   | 348              | 3-Aug-03               |             |             |                              |                              |                                  |           |         |         |                       | 1        | 141/161                 | 235/235                                | 182/190         | 286/298                           | neg                                                        |         |         |     |     |  |  |
| urine                   | u505             | 14-Sep-03              |             |             |                              |                              |                                  |           |         |         |                       | neg      |                         |                                        |                 |                                   |                                                            |         |         |     |     |  |  |
| urine                   | u554             | 15-Dec-03              |             |             |                              |                              |                                  |           |         |         |                       | neg      |                         |                                        |                 |                                   |                                                            |         |         |     |     |  |  |
| fecal                   | 402              | 24-May-04              |             |             |                              |                              |                                  |           |         |         |                       | neg      |                         |                                        |                 |                                   |                                                            |         |         |     |     |  |  |
| fecal                   | 403              | 11-Jul-04              |             |             |                              |                              |                                  |           |         |         |                       | neg      |                         |                                        |                 |                                   |                                                            |         |         |     |     |  |  |
| fecal                   | 404              | 12-Jul-04              |             |             |                              |                              |                                  |           |         |         |                       | neg      |                         |                                        |                 |                                   |                                                            |         |         |     |     |  |  |
| fecal                   | 405              | 18-Jul-04              |             |             |                              |                              |                                  |           |         |         |                       | neg      |                         |                                        |                 |                                   |                                                            |         |         |     |     |  |  |
| fecal                   | 640              | 12-Sep-04              |             |             |                              |                              |                                  |           |         |         |                       | neg      |                         |                                        |                 |                                   |                                                            |         |         |     |     |  |  |
| fecal                   | 728              | 16-May-05              |             |             |                              |                              |                                  |           |         |         |                       | neg      |                         |                                        |                 |                                   |                                                            |         |         |     |     |  |  |
| fecal                   | 793              | 14-Sep-05              |             |             |                              |                              |                                  |           |         |         |                       | neg      |                         |                                        |                 |                                   |                                                            |         |         |     |     |  |  |
| fecal                   | 980              | 29-Jan-06              | 1           | 141/161     | 235/235                      |                              |                                  |           |         |         |                       | 182/190  | 286/298                 | neg                                    |                 |                                   |                                                            |         |         |     |     |  |  |
| fecal                   | 1103             | 2-Aug-06               | 1           | 141/161     | 235/235                      |                              |                                  |           |         |         |                       | 182/190  | 286/298                 | neg                                    |                 |                                   |                                                            |         |         |     |     |  |  |
| fecal                   | 1364             | 22-Jan-07              | 141/161     | 235/235     | 182/190                      | 286/298                      | neg                              |           |         |         |                       |          |                         |                                        |                 |                                   |                                                            |         |         |     |     |  |  |
| fecal                   | 1426             | 24-Jan-07              | 141/161     | 235/235     | 182/190                      | 286/298                      | neg                              |           |         |         |                       |          |                         |                                        |                 |                                   |                                                            |         |         |     |     |  |  |
| fecal                   | 1240             | 17-Sep-07              | 141/161     | 235/235     | 182/190                      | 286/298                      | neg                              |           |         |         |                       |          |                         |                                        |                 |                                   |                                                            |         |         |     |     |  |  |
| fecal                   | 1341             | 3-Jun-08               | 141/161     | 235/235     | 182/190                      | 286/298                      | neg                              |           |         |         |                       |          |                         |                                        |                 |                                   |                                                            |         |         |     |     |  |  |
| fecal                   | 1467             | 15-Oct-08              | 1           | 141/161     | 235/235                      | 182/190                      | 286/298                          | neg       |         |         |                       |          |                         |                                        |                 |                                   |                                                            |         |         |     |     |  |  |
| Ch-016                  | M                | KK                     | fecal       | 16          | 13-Nov-00                    | 1                            | 161/173                          | 196/235   | 190/190 | 302/306 | neg                   | neg      |                         |                                        |                 | DOB (6-Sep-64)<br>DOD (24-Aug-04) |                                                            |         |         |     |     |  |  |
|                         |                  |                        | urine       | u16         | 13-Nov-00                    | neg                          |                                  |           |         |         |                       |          |                         |                                        |                 |                                   |                                                            |         |         |     |     |  |  |
|                         |                  |                        | fecal       | 80          | 14-Dec-01                    | neg                          |                                  |           |         |         |                       |          |                         |                                        |                 |                                   |                                                            |         |         |     |     |  |  |
|                         |                  |                        | fecal       | 66          | 18-Dec-01                    | neg                          |                                  |           |         |         |                       |          |                         |                                        |                 |                                   |                                                            |         |         |     |     |  |  |
|                         |                  |                        | fecal       | 59          | 8-Jan-02                     | 161/173                      | 196/235                          | 190/190   | 302/306 | neg     |                       |          |                         |                                        |                 |                                   |                                                            |         |         |     |     |  |  |
|                         |                  |                        | fecal       | 190         | 17-Mar-02                    | neg                          |                                  |           |         |         |                       |          |                         |                                        |                 |                                   |                                                            |         |         |     |     |  |  |
|                         |                  |                        | urine       | u29         | 11-Apr-02                    | neg                          |                                  |           |         |         |                       |          |                         |                                        |                 |                                   |                                                            |         |         |     |     |  |  |
|                         |                  |                        | urine       | u30         | 13-Apr-02                    | neg                          |                                  |           |         |         |                       |          |                         |                                        |                 |                                   |                                                            |         |         |     |     |  |  |
|                         |                  |                        | urine       | u32         | 16-Apr-02                    | neg                          |                                  |           |         |         |                       |          |                         |                                        |                 |                                   |                                                            |         |         |     |     |  |  |
|                         |                  |                        | urine       | u69         | 16-Apr-02                    | neg                          |                                  |           |         |         |                       |          |                         |                                        |                 |                                   |                                                            |         |         |     |     |  |  |
|                         |                  |                        | urine       | u31         | 25-Apr-02                    | neg                          |                                  |           |         |         |                       |          |                         |                                        |                 |                                   |                                                            |         |         |     |     |  |  |
|                         |                  |                        | urine       | u70         | 25-Apr-02                    | neg                          |                                  |           |         |         |                       |          |                         |                                        |                 |                                   |                                                            |         |         |     |     |  |  |
|                         |                  |                        | fecal       | 169         | 7-May-02                     | neg                          |                                  |           |         |         |                       |          |                         |                                        |                 |                                   |                                                            |         |         |     |     |  |  |
|                         |                  |                        | fecal       | 141         | 9-Jun-02                     | 161/173                      | 196/235                          | 190/190   | 302/306 | neg     |                       |          |                         |                                        |                 |                                   |                                                            |         |         |     |     |  |  |
|                         |                  |                        | urine       | u716        | 19-Jun-03                    | neg                          |                                  |           |         |         |                       |          |                         |                                        |                 |                                   |                                                            |         |         |     |     |  |  |
|                         |                  |                        | fecal       | 334         | 17-Aug-03                    | neg                          |                                  |           |         |         |                       |          |                         |                                        |                 |                                   |                                                            |         |         |     |     |  |  |
|                         |                  |                        | fecal       | 406         | 1-Apr-04                     | neg                          |                                  |           |         |         |                       |          |                         |                                        |                 |                                   |                                                            |         |         |     |     |  |  |
|                         |                  |                        | fecal       | 407         | 15-May-04                    | neg                          |                                  |           |         |         |                       |          |                         |                                        |                 |                                   |                                                            |         |         |     |     |  |  |
|                         |                  |                        | fecal       | 408         | 26-Jun-04                    | neg                          |                                  |           |         |         |                       |          |                         |                                        |                 |                                   |                                                            |         |         |     |     |  |  |
|                         |                  |                        | fecal       | 409         | 4-Jul-04                     | neg                          |                                  |           |         |         |                       |          |                         |                                        |                 |                                   |                                                            |         |         |     |     |  |  |
|                         |                  |                        | fecal       | 410         | 10-Jul-04                    | neg                          |                                  |           |         |         |                       |          |                         |                                        |                 |                                   |                                                            |         |         |     |     |  |  |
|                         |                  |                        | fecal       | 646         | 18-Aug-04                    | 161/173                      | 196/235                          | 190/190   | 302/306 | neg     |                       |          |                         |                                        |                 |                                   |                                                            |         |         |     |     |  |  |
| urine                   | u28              | na                     | neg         |             |                              |                              |                                  |           |         |         |                       |          |                         |                                        |                 |                                   |                                                            |         |         |     |     |  |  |
| Ch-017                  | F                | KK                     | fecal       | 38          | 22-Nov-01                    | 1                            | 141/173                          | 200/204   | 182/194 | 302/306 | neg                   | neg      |                         |                                        |                 | DOB (13-Jul-98)                   |                                                            |         |         |     |     |  |  |
|                         |                  |                        | urine       | u152        | 6-Jun-02                     | neg                          |                                  |           |         |         |                       |          |                         |                                        |                 |                                   |                                                            |         |         |     |     |  |  |
|                         |                  |                        | urine       | u193        | 25-Jul-02                    | neg                          |                                  |           |         |         |                       |          |                         |                                        |                 |                                   |                                                            |         |         |     |     |  |  |
|                         |                  |                        | fecal       | 416         | 22-May-04                    | neg                          |                                  |           |         |         |                       |          |                         |                                        |                 |                                   |                                                            |         |         |     |     |  |  |
|                         |                  |                        | fecal       | 417         | 11-Jul-04                    | neg                          |                                  |           |         |         |                       |          |                         |                                        |                 |                                   |                                                            |         |         |     |     |  |  |
|                         |                  |                        | fecal       | 647         | 23-Nov-04                    | neg                          |                                  |           |         |         |                       |          |                         |                                        |                 |                                   |                                                            |         |         |     |     |  |  |
|                         |                  |                        | fecal       | 729         | 10-May-05                    | neg                          |                                  |           |         |         |                       |          |                         |                                        |                 |                                   |                                                            |         |         |     |     |  |  |
|                         |                  |                        | fecal       | 982         | 4-Dec-05                     | neg                          |                                  |           |         |         |                       |          |                         |                                        |                 |                                   |                                                            |         |         |     |     |  |  |





| Individual <sup>1</sup> | Sex <sup>2</sup> | Community <sup>3</sup> | Sample type | Sample Code | Collection Date <sup>4</sup> | mtDNA haplotype <sup>5</sup> | Microsatellite Loci <sup>6</sup> |         |         |         | urine WB <sup>7</sup> | fecal WB | fecal vRNA <sup>8</sup> | GenBank accession numbers <sup>9</sup> |          | SIVcpz Strain | Birth and Death Dates with Immigration Notes <sup>10</sup> |         |         |         |         |     |     |     |     |  |  |                                                    |     |       |         |           |         |         |         |         |         |          |       |  |                                   |     |  |                                                    |         |         |     |     |  |  |  |  |
|-------------------------|------------------|------------------------|-------------|-------------|------------------------------|------------------------------|----------------------------------|---------|---------|---------|-----------------------|----------|-------------------------|----------------------------------------|----------|---------------|------------------------------------------------------------|---------|---------|---------|---------|-----|-----|-----|-----|--|--|----------------------------------------------------|-----|-------|---------|-----------|---------|---------|---------|---------|---------|----------|-------|--|-----------------------------------|-----|--|----------------------------------------------------|---------|---------|-----|-----|--|--|--|--|
|                         |                  |                        |             |             |                              |                              | D18s536                          | D4s243  | D10s676 | D9s922  |                       |          |                         | pol                                    | gp41/nef |               |                                                            |         |         |         |         |     |     |     |     |  |  |                                                    |     |       |         |           |         |         |         |         |         |          |       |  |                                   |     |  |                                                    |         |         |     |     |  |  |  |  |
| Ch-027<br>(Con't)       |                  | KK                     | fecal       | 450         | 5-Jun-04                     | 5                            | 141/161                          | 196/200 | 186/186 | 286/290 | neg                   | neg      |                         |                                        |          |               |                                                            |         |         |         |         |     |     |     |     |  |  |                                                    |     |       |         |           |         |         |         |         |         |          |       |  |                                   |     |  |                                                    |         |         |     |     |  |  |  |  |
|                         |                  |                        | fecal       | 680         | 15-Sep-04                    |                              |                                  |         |         |         |                       |          |                         |                                        |          |               |                                                            | neg     |         |         |         |     |     |     |     |  |  |                                                    |     |       |         |           |         |         |         |         |         |          |       |  |                                   |     |  |                                                    |         |         |     |     |  |  |  |  |
|                         |                  |                        | fecal       | 1018        | 2-Dec-04                     |                              |                                  |         |         |         |                       |          |                         |                                        |          |               |                                                            | neg     |         |         |         |     |     |     |     |  |  |                                                    |     |       |         |           |         |         |         |         |         |          |       |  |                                   |     |  |                                                    |         |         |     |     |  |  |  |  |
|                         |                  |                        | fecal       | 811         | 10-Jun-05                    |                              |                                  |         |         |         |                       |          |                         |                                        |          |               |                                                            | neg     |         |         |         |     |     |     |     |  |  |                                                    |     |       |         |           |         |         |         |         |         |          |       |  |                                   |     |  |                                                    |         |         |     |     |  |  |  |  |
|                         |                  |                        | fecal       | 1119        | 25-Aug-06                    |                              |                                  |         |         |         |                       |          |                         |                                        |          |               |                                                            | neg     |         |         |         |     |     |     |     |  |  |                                                    |     |       |         |           |         |         |         |         |         |          |       |  |                                   |     |  |                                                    |         |         |     |     |  |  |  |  |
|                         |                  |                        | fecal       | 1151        | 30-Jan-07                    |                              |                                  |         |         |         |                       |          |                         |                                        |          |               |                                                            | neg     |         |         |         |     |     |     |     |  |  |                                                    |     |       |         |           |         |         |         |         |         |          |       |  |                                   |     |  |                                                    |         |         |     |     |  |  |  |  |
|                         |                  |                        | fecal       | 1310        | 4-Jul-07                     |                              |                                  |         |         |         |                       |          |                         |                                        |          |               |                                                            | neg     |         |         |         |     |     |     |     |  |  |                                                    |     |       |         |           |         |         |         |         |         |          |       |  |                                   |     |  |                                                    |         |         |     |     |  |  |  |  |
|                         |                  |                        | fecal       | 1515        | 17-Oct-08                    |                              |                                  |         |         |         |                       |          |                         |                                        |          |               |                                                            | neg     |         |         |         |     |     |     |     |  |  |                                                    |     |       |         |           |         |         |         |         |         |          |       |  |                                   |     |  |                                                    |         |         |     |     |  |  |  |  |
|                         |                  |                        | fecal       | 1370        | na                           |                              |                                  |         |         |         |                       |          |                         |                                        |          |               |                                                            | neg     |         |         |         |     |     |     |     |  |  |                                                    |     |       |         |           |         |         |         |         |         |          |       |  |                                   |     |  |                                                    |         |         |     |     |  |  |  |  |
| Ch-028                  | F                | KK                     | fecal       | 121         | 29-Dec-01                    | 5                            | 157/173                          | 200/231 | 186/190 | 302/302 | neg                   | neg      |                         |                                        |          |               | DOB (25-Jan-91)<br>DOD (5-Nov-06)                          |         |         |         |         |     |     |     |     |  |  |                                                    |     |       |         |           |         |         |         |         |         |          |       |  |                                   |     |  |                                                    |         |         |     |     |  |  |  |  |
|                         |                  |                        | urine       | u165        | 23-Apr-02                    |                              |                                  |         |         |         |                       |          |                         |                                        |          |               |                                                            | neg     |         |         |         |     |     |     |     |  |  |                                                    |     |       |         |           |         |         |         |         |         |          |       |  |                                   |     |  |                                                    |         |         |     |     |  |  |  |  |
|                         |                  |                        | urine       | u166        | 23-Apr-02                    |                              |                                  |         |         |         |                       |          |                         |                                        |          |               |                                                            | neg     |         |         |         |     |     |     |     |  |  |                                                    |     |       |         |           |         |         |         |         |         |          |       |  |                                   |     |  |                                                    |         |         |     |     |  |  |  |  |
|                         |                  |                        | urine       | u45         | 27-Apr-02                    |                              |                                  |         |         |         |                       |          |                         |                                        |          |               |                                                            | neg     |         |         |         |     |     |     |     |  |  |                                                    |     |       |         |           |         |         |         |         |         |          |       |  |                                   |     |  |                                                    |         |         |     |     |  |  |  |  |
|                         |                  |                        | urine       | u44         | 29-Apr-02                    |                              |                                  |         |         |         |                       |          |                         |                                        |          |               |                                                            | neg     |         |         |         |     |     |     |     |  |  |                                                    |     |       |         |           |         |         |         |         |         |          |       |  |                                   |     |  |                                                    |         |         |     |     |  |  |  |  |
|                         |                  |                        | fecal       | 155         | 28-May-02                    |                              |                                  |         |         |         |                       |          |                         |                                        |          |               |                                                            | 5       |         |         |         |     |     | neg | neg |  |  |                                                    |     |       |         |           |         |         |         |         |         |          |       |  |                                   |     |  |                                                    |         |         |     |     |  |  |  |  |
|                         |                  |                        | fecal       | 157         | 28-May-02                    |                              |                                  |         |         |         |                       |          |                         |                                        |          |               |                                                            |         |         |         |         |     |     |     |     |  |  |                                                    |     | neg   |         |           |         |         |         |         |         |          |       |  |                                   |     |  |                                                    |         |         |     |     |  |  |  |  |
|                         |                  |                        | urine       | u264        | 5-Jul-02                     |                              |                                  |         |         |         |                       |          |                         |                                        |          |               |                                                            |         |         |         |         |     |     |     |     |  |  |                                                    |     | neg   |         |           |         |         |         |         |         |          |       |  |                                   |     |  |                                                    |         |         |     |     |  |  |  |  |
|                         |                  |                        | fecal       | 342         | 6-Aug-03                     |                              |                                  |         |         |         |                       |          |                         |                                        |          |               |                                                            |         |         |         |         |     |     |     |     |  |  |                                                    |     | neg   |         |           |         |         |         |         |         |          |       |  |                                   |     |  |                                                    |         |         |     |     |  |  |  |  |
|                         |                  |                        | urine       | u499        | 27-Aug-03                    |                              |                                  |         |         |         |                       |          |                         |                                        |          |               |                                                            |         |         |         |         |     |     |     |     |  |  |                                                    |     | neg   |         |           |         |         |         |         |         |          |       |  |                                   |     |  |                                                    |         |         |     |     |  |  |  |  |
|                         |                  |                        | fecal       | 452         | 13-Jul-04                    |                              |                                  |         |         |         |                       |          |                         |                                        |          |               |                                                            |         |         |         |         |     |     |     |     |  |  |                                                    |     | neg   |         |           |         |         |         |         |         |          |       |  |                                   |     |  |                                                    |         |         |     |     |  |  |  |  |
|                         |                  |                        | fecal       | 683         | 2-Dec-04                     |                              |                                  |         |         |         |                       |          |                         |                                        |          |               |                                                            |         |         |         |         |     |     |     |     |  |  |                                                    |     | neg   |         |           |         |         |         |         |         |          |       |  |                                   |     |  |                                                    |         |         |     |     |  |  |  |  |
|                         |                  |                        | fecal       | 1088        | 12-Apr-05                    |                              |                                  |         |         |         |                       |          |                         |                                        |          |               |                                                            |         |         |         |         |     |     |     |     |  |  |                                                    |     | neg   |         |           |         |         |         |         |         |          |       |  |                                   |     |  |                                                    |         |         |     |     |  |  |  |  |
|                         |                  |                        | fecal       | 813         | 18-Jul-05                    |                              |                                  |         |         |         |                       |          |                         |                                        |          |               |                                                            |         |         |         |         |     |     |     |     |  |  |                                                    |     | neg   |         |           |         |         |         |         |         |          |       |  |                                   |     |  |                                                    |         |         |     |     |  |  |  |  |
|                         |                  |                        | fecal       | 863         | 13-Oct-05                    |                              |                                  |         |         |         |                       |          |                         |                                        |          |               |                                                            |         |         |         |         |     |     |     |     |  |  |                                                    |     | 5     | 157/173 | 200/231   | 186/190 | 302/302 | neg     | neg     |         |          |       |  |                                   |     |  |                                                    |         |         |     |     |  |  |  |  |
|                         |                  |                        | Ch-029      | F           | KK                           |                              |                                  |         |         |         |                       |          |                         |                                        |          |               |                                                            |         |         |         |         |     |     |     |     |  |  |                                                    |     | fecal | 118     | 23-Dec-01 | 2       | 141/161 | 196/196 | 182/190 | 294/302 | neg      | neg   |  |                                   |     |  | DOB (2-Jul-78)*<br>First arrived in KK (14-Aug-00) |         |         |     |     |  |  |  |  |
|                         |                  |                        |             |             |                              |                              |                                  |         |         |         |                       |          |                         |                                        |          |               |                                                            |         |         |         |         |     |     |     |     |  |  |                                                    |     | urine | u275    | 26-Feb-02 |         |         |         |         |         |          |       |  |                                   |     |  |                                                    | neg     |         |     |     |  |  |  |  |
|                         |                  |                        |             |             |                              |                              |                                  |         |         |         |                       |          |                         |                                        |          |               |                                                            |         |         |         |         |     |     |     |     |  |  |                                                    |     | urine | u276    | 9-Mar-02  |         |         |         |         |         |          |       |  |                                   |     |  |                                                    | neg     |         |     |     |  |  |  |  |
| urine                   | u34              | 10-Mar-02              |             |             |                              | neg                          |                                  |         |         |         |                       |          |                         |                                        |          |               |                                                            |         |         |         |         |     |     |     |     |  |  |                                                    |     |       |         |           |         |         |         |         |         |          |       |  |                                   |     |  |                                                    |         |         |     |     |  |  |  |  |
| urine                   | u35              | 18-Mar-02              |             |             |                              | neg                          |                                  |         |         |         |                       |          |                         |                                        |          |               |                                                            |         |         |         |         |     |     |     |     |  |  |                                                    |     |       |         |           |         |         |         |         |         |          |       |  |                                   |     |  |                                                    |         |         |     |     |  |  |  |  |
| fecal                   | 185              | 3-Apr-02               |             |             |                              | 2                            |                                  |         |         |         |                       | neg      | neg                     |                                        |          |               |                                                            |         |         |         |         |     |     |     |     |  |  |                                                    |     |       |         |           |         |         |         |         |         |          |       |  |                                   |     |  |                                                    |         |         |     |     |  |  |  |  |
| fecal                   | 222              | 25-Jun-02              |             |             |                              |                              |                                  |         |         |         |                       |          |                         |                                        |          |               |                                                            |         |         |         |         |     |     |     |     |  |  |                                                    |     | neg   |         |           |         |         |         |         |         |          |       |  |                                   |     |  |                                                    |         |         |     |     |  |  |  |  |
| urine                   | u266             | 23-Sep-02              |             |             |                              |                              |                                  |         |         |         |                       |          |                         |                                        |          |               |                                                            |         |         |         |         |     |     |     |     |  |  |                                                    |     | neg   |         |           |         |         |         |         |         |          |       |  |                                   |     |  |                                                    |         |         |     |     |  |  |  |  |
| urine                   | u267             | 10-Oct-02              |             |             |                              |                              |                                  |         |         |         |                       |          |                         |                                        |          |               |                                                            | neg     |         |         |         |     |     |     |     |  |  |                                                    |     |       |         |           |         |         |         |         |         |          |       |  |                                   |     |  |                                                    |         |         |     |     |  |  |  |  |
| urine                   | u277             | 13-Nov-02              |             |             |                              |                              |                                  |         |         |         |                       |          |                         |                                        |          |               |                                                            | neg     |         |         |         |     |     |     |     |  |  |                                                    |     |       |         |           |         |         |         |         |         |          |       |  |                                   |     |  |                                                    |         |         |     |     |  |  |  |  |
| fecal                   | 447              | 10-Jun-04              |             |             |                              |                              |                                  |         |         |         |                       |          |                         |                                        |          |               |                                                            | 2       | 141/161 | 196/196 | 182/190 |     |     | neg | neg |  |  |                                                    |     |       |         |           |         |         |         |         |         |          |       |  |                                   |     |  |                                                    |         |         |     |     |  |  |  |  |
| fecal                   | 448              | 8-Jul-04               |             |             |                              |                              |                                  |         |         |         |                       |          |                         |                                        |          |               |                                                            |         |         |         |         |     |     |     |     |  |  |                                                    |     | neg   |         |           |         |         |         |         |         |          |       |  |                                   |     |  |                                                    |         |         |     |     |  |  |  |  |
| fecal                   | 1016             | 6-Jan-05               |             |             |                              |                              |                                  |         |         |         |                       |          |                         |                                        |          |               |                                                            |         |         |         |         |     |     |     |     |  |  |                                                    |     | neg   |         |           |         |         |         |         |         |          |       |  |                                   |     |  |                                                    |         |         |     |     |  |  |  |  |
| fecal                   | 741              | 9-May-05               |             |             |                              |                              |                                  |         |         |         |                       |          |                         |                                        |          |               |                                                            |         |         |         |         |     |     |     |     |  |  |                                                    |     | 2     | 141/161 | 196/196   |         |         |         |         |         |          |       |  |                                   |     |  |                                                    | 182/190 | 294/302 | neg | neg |  |  |  |  |
| fecal                   | 1017             | 15-Nov-05              |             |             |                              |                              |                                  |         |         |         |                       |          |                         |                                        |          |               |                                                            |         |         |         |         |     |     |     |     |  |  |                                                    |     | neg   |         |           |         |         |         |         |         |          |       |  |                                   |     |  |                                                    |         |         |     |     |  |  |  |  |
| fecal                   | 1118             | 3-Sep-06               |             |             |                              |                              |                                  |         |         |         |                       |          |                         |                                        |          |               |                                                            |         |         |         |         |     |     |     |     |  |  |                                                    |     | neg   |         |           |         |         |         |         |         |          |       |  |                                   |     |  |                                                    |         |         |     |     |  |  |  |  |
| fecal                   | 1168             | 14-Feb-07              |             |             |                              |                              |                                  |         |         |         |                       |          |                         |                                        |          |               |                                                            |         |         |         |         |     |     |     |     |  |  |                                                    |     | neg   |         |           |         |         |         |         |         |          |       |  |                                   |     |  |                                                    |         |         |     |     |  |  |  |  |
| fecal                   | 1442             | 2-Nov-08               |             |             |                              |                              |                                  |         |         |         |                       |          |                         |                                        |          |               |                                                            |         |         |         |         |     |     |     |     |  |  |                                                    |     | neg   |         |           |         |         |         |         |         |          |       |  |                                   |     |  |                                                    |         |         |     |     |  |  |  |  |
| Ch-030                  | F                | KK                     | fecal       | 84          | 13-Dec-01                    |                              |                                  |         |         |         |                       |          |                         |                                        |          |               |                                                            |         |         |         |         |     |     |     |     |  |  |                                                    |     | 13    | 169/173 | 196/196   | 158/182 | 294/298 | pos     | pos     |         | FJ895391 | TAN17 |  | DOB (27-Mar-70)<br>DLS (8-Dec-03) |     |  |                                                    |         |         |     |     |  |  |  |  |
|                         |                  |                        | urine       | u49         | 31-Mar-02                    |                              |                                  |         |         |         |                       |          |                         |                                        |          |               |                                                            |         |         |         |         |     |     |     |     |  |  |                                                    |     |       |         |           |         |         |         |         |         |          |       |  |                                   | pos |  |                                                    |         |         |     |     |  |  |  |  |
|                         |                  |                        | urine       | u50         | 8-Apr-02                     |                              |                                  |         |         |         |                       |          |                         |                                        |          |               |                                                            |         |         |         |         |     |     |     |     |  |  |                                                    |     |       |         |           |         |         |         |         |         |          |       |  |                                   | pos |  |                                                    |         |         |     |     |  |  |  |  |
|                         |                  |                        | urine       | u169        | 8-Apr-02                     |                              |                                  |         |         |         |                       |          |                         |                                        |          |               |                                                            |         |         |         |         |     |     |     |     |  |  |                                                    |     |       |         |           |         |         |         |         |         |          |       |  |                                   | pos |  |                                                    |         |         |     |     |  |  |  |  |
|                         |                  |                        | urine       | u170        | 7-Jul-02                     |                              |                                  |         |         |         |                       |          |                         |                                        |          |               |                                                            |         |         |         |         |     |     |     |     |  |  |                                                    |     |       |         |           |         |         |         |         |         |          |       |  |                                   | pos |  |                                                    |         |         |     |     |  |  |  |  |
|                         |                  |                        | urine       | u170        | 7-Jul-02                     | pos                          |                                  |         |         |         |                       |          |                         |                                        |          |               |                                                            |         |         |         |         |     |     |     |     |  |  |                                                    |     |       |         |           |         |         |         |         |         |          |       |  |                                   |     |  |                                                    |         |         |     |     |  |  |  |  |
|                         |                  |                        | fecal       | 145         | 2-Jul-02                     | 13                           |                                  |         |         |         |                       | pos      | neg                     |                                        |          |               |                                                            |         |         |         |         |     |     |     |     |  |  |                                                    |     |       |         |           |         |         |         |         |         |          |       |  |                                   |     |  |                                                    |         |         |     |     |  |  |  |  |
|                         |                  |                        | urine       | u170        | 7-Jul-02                     |                              |                                  |         |         |         |                       |          |                         |                                        |          |               | pos                                                        |         |         |         |         |     |     |     |     |  |  |                                                    |     |       |         |           |         |         |         |         |         |          |       |  |                                   |     |  |                                                    |         |         |     |     |  |  |  |  |
|                         |                  |                        | fecal       | 277         | 14-Feb-03                    |                              |                                  |         |         |         |                       |          |                         |                                        |          |               | pos                                                        |         |         |         |         |     |     |     |     |  |  |                                                    |     |       |         |           |         |         |         |         |         |          |       |  |                                   |     |  |                                                    |         |         |     |     |  |  |  |  |
| fecal                   | 269              | 24-Mar-03              | pos         |             |                              |                              |                                  |         |         |         |                       |          |                         |                                        |          |               |                                                            |         |         |         |         |     |     |     |     |  |  |                                                    |     |       |         |           |         |         |         |         |         |          |       |  |                                   |     |  |                                                    |         |         |     |     |  |  |  |  |
| fecal                   | 337              | 7-Aug-03               | pos         |             |                              |                              |                                  |         |         |         |                       |          |                         |                                        |          |               |                                                            |         |         |         |         |     |     |     |     |  |  |                                                    |     |       |         |           |         |         |         |         |         |          |       |  |                                   |     |  |                                                    |         |         |     |     |  |  |  |  |
| Ch-031                  | F                | KK                     | fecal       | 11          | 6-Nov-00                     |                              |                                  |         |         |         |                       |          |                         |                                        |          |               | 5                                                          | 157/161 | 196/231 | 182/186 | 286/302 | neg | neg |     |     |  |  | DOB (2-Jul-58)*<br>First arrived in KK (15-Sep-71) |     |       |         |           |         |         |         |         |         |          |       |  |                                   |     |  |                                                    |         |         |     |     |  |  |  |  |
|                         |                  |                        | urine       | u441        | 12-Jul-01                    |                              |                                  |         |         |         |                       |          |                         |                                        |          |               |                                                            |         |         |         |         |     |     |     |     |  |  |                                                    | neg |       |         |           |         |         |         |         |         |          |       |  |                                   |     |  |                                                    |         |         |     |     |  |  |  |  |
|                         |                  |                        | urine       | u171        | 11-Dec-01                    |                              |                                  |         |         |         |                       |          |                         |                                        |          |               |                                                            |         |         |         |         |     |     |     |     |  |  |                                                    | neg |       |         |           |         |         |         |         |         |          |       |  |                                   |     |  |                                                    |         |         |     |     |  |  |  |  |
|                         |                  |                        | fecal       | 75          | 16-Dec-01                    |                              |                                  |         |         |         |                       |          |                         |                                        |          |               |                                                            |         |         |         |         |     |     |     |     |  |  |                                                    | neg |       |         |           |         |         |         |         |         |          |       |  |                                   |     |  |                                                    |         |         |     |     |  |  |  |  |
|                         |                  |                        | fecal       | 53          | 3-Jan-02                     | neg                          |                                  |         |         |         |                       |          |                         |                                        |          |               |                                                            |         |         |         |         |     |     |     |     |  |  |                                                    |     |       |         |           |         |         |         |         |         |          |       |  |                                   |     |  |                                                    |         |         |     |     |  |  |  |  |
|                         |                  |                        | fecal       | 44          | 9-Jan-02                     | neg                          |                                  |         |         |         |                       |          |                         |                                        |          |               |                                                            |         |         |         |         |     |     |     |     |  |  |                                                    |     |       |         |           |         |         |         |         |         |          |       |  |                                   |     |  |                                                    |         |         |     |     |  |  |  |  |
|                         |                  |                        | urine       | u67         | 20-Mar-02                    | neg                          |                                  |         |         |         |                       |          |                         |                                        |          |               |                                                            |         |         |         |         |     |     |     |     |  |  |                                                    |     |       |         |           |         |         |         |         |         |          |       |  |                                   |     |  |                                                    |         |         |     |     |  |  |  |  |
|                         |                  |                        | urine       | u68         | 22-Apr-02                    | neg                          |                                  |         |         |         |                       |          |                         |                                        |          |               |                                                            |         |         |         |         |     |     |     |     |  |  |                                                    |     |       |         |           |         |         |         |         |         |          |       |  |                                   |     |  |                                                    |         |         |     |     |  |  |  |  |
|                         |                  |                        | fecal       | 202         | 27-Apr-02                    | neg                          |                                  |         |         |         |                       |          |                         |                                        |          |               |                                                            |         |         |         |         |     |     |     |     |  |  |                                                    |     |       |         |           |         |         |         |         |         |          |       |  |                                   |     |  |                                                    |         |         |     |     |  |  |  |  |
|                         |                  |                        | fecal       | 152         | 20-May-02                    | neg                          |                                  |         |         |         |                       |          |                         |                                        |          |               |                                                            |         |         |         |         |     |     |     |     |  |  |                                                    |     |       |         |           |         |         |         |         |         |          |       |  |                                   |     |  |                                                    |         |         |     |     |  |  |  |  |
|                         |                  |                        | urine       | u149        | 20-May-02                    | neg                          |                                  |         |         |         |                       |          |                         |                                        |          |               |                                                            |         |         |         |         |     |     |     |     |  |  |                                                    |     |       |         |           |         |         |         |         |         |          |       |  |                                   |     |  |                                                    |         |         |     |     |  |  |  |  |
|                         |                  |                        | urine       | u150        | 21-May-02                    | neg                          |                                  |         |         |         |                       |          |                         |                                        |          |               |                                                            |         |         |         |         |     |     |     |     |  |  |                                                    |     |       |         |           |         |         |         |         |         |          |       |  |                                   |     |  |                                                    |         |         |     |     |  |  |  |  |
|                         |                  |                        | urine       | u274        | 12-Aug-02                    | neg                          |                                  |         |         |         |                       |          |                         |                                        |          |               |                                                            |         |         |         |         |     |     |     |     |  |  |                                                    |     |       |         |           |         |         |         |         |         |          |       |  |                                   |     |  |                                                    |         |         |     |     |  |  |  |  |
|                         |                  |                        | urine       | u273        | 7-Oct-02                     | neg                          |                                  |         |         |         |                       |          |                         |                                        |          |               |                                                            |         |         |         |         |     |     |     |     |  |  |                                                    |     |       |         |           |         |         |         |         |         |          |       |  |                                   |     |  |                                                    |         |         |     |     |  |  |  |  |
|                         |                  |                        | urine       | u574        | 20-Dec-02                    | neg                          |                                  |         |         |         |                       |          |                         |                                        |          |               |                                                            |         |         |         |         |     |     |     |     |  |  |                                                    |     |       |         |           |         |         |         |         |         |          |       |  |                                   |     |  |                                                    |         |         |     |     |  |  |  |  |
|                         |                  |                        | fecal       | 352         | 18-Sep-03                    | 5                            | 157/161                          | 196/231 | 182/186 | 286/302 | neg                   | neg      |                         |                                        |          |               |                                                            |         |         |         |         |     |     |     |     |  |  |                                                    |     |       |         |           |         |         |         |         |         |          |       |  |                                   |     |  |                                                    |         |         |     |     |  |  |  |  |
|                         |                  |                        | urine       | u521        | 14-Dec-03                    |                              |                                  |         |         |         |                       |          |                         |                                        |          |               |                                                            |         |         |         |         |     |     |     |     |  |  |                                                    |     | neg   |         |           |         |         |         |         |         |          |       |  |                                   |     |  |                                                    |         |         |     |     |  |  |  |  |
|                         |                  |                        | fecal       | 453         | 19-May-04                    |                              |                                  |         |         |         |                       |          |                         |                                        |          |               |                                                            |         |         |         |         |     |     |     |     |  |  |                                                    |     | neg   |         |           |         |         |         |         |         |          |       |  |                                   |     |  |                                                    |         |         |     |     |  |  |  |  |
|                         |                  |                        | fecal       | 454         | 10-Jun-04                    |                              |                                  |         |         |         |                       |          |                         |                                        |          |               |                                                            |         |         |         |         |     |     |     |     |  |  |                                                    |     | neg   |         |           |         |         |         |         |         |          |       |  |                                   |     |  |                                                    |         |         |     |     |  |  |  |  |
|                         |                  |                        | fecal       | 456         | 30-Jun-04                    |                              |                                  |         |         |         |                       |          |                         |                                        |          |               |                                                            |         |         |         |         |     |     |     |     |  |  |                                                    |     | neg   |         |           |         |         |         |         |         |          |       |  |                                   |     |  |                                                    |         |         |     |     |  |  |  |  |
|                         |                  |                        | fecal       | 455         | 1-Jul-04                     |                              |                                  |         |         |         |                       |          |                         |                                        |          |               |                                                            |         |         |         |         |     |     |     |     |  |  |                                                    |     | neg   |         |           |         |         |         |         |         |          |       |  |                                   |     |  |                                                    |         |         |     |     |  |  |  |  |
|                         |                  |                        | fecal       | 458         | 17-Jul-04                    |                              |                                  |         |         |         |                       |          |                         |                                        |          |               |                                                            |         |         |         |         |     |     |     |     |  |  |                                                    |     | neg   |         |           |         |         |         |         |         |          |       |  |                                   |     |  |                                                    |         |         |     |     |  |  |  |  |
|                         |                  |                        | fecal       | 457         | 18-Jul-04                    |                              |                                  |         |         |         |                       |          |                         |                                        |          |               |                                                            |         |         |         |         |     |     |     |     |  |  |                                                    |     | neg   |         |           |         |         |         |         |         |          |       |  |                                   |     |  |                                                    |         |         |     |     |  |  |  |  |
|                         |                  |                        | fecal       | 684         | 20-Nov-04                    |                              |                                  |         |         |         |                       |          |                         |                                        |          |               |                                                            |         |         |         |         |     |     |     |     |  |  |                                                    |     | neg   |         |           |         |         |         |         |         |          |       |  |                                   |     |  |                                                    |         |         |     |     |  |  |  |  |
|                         |                  |                        | fecal       | 1023        | 18-Dec-04                    |                              |                                  |         |         |         |                       |          |                         |                                        |          |               |                                                            |         |         |         |         |     |     |     |     |  |  |                                                    |     | neg   |         |           |         |         |         |         |         |          |       |  |                                   |     |  |                                                    |         |         |     |     |  |  |  |  |
|                         |                  |                        | fecal       | 742         | 9-May-05                     |                              |                                  |         |         |         |                       |          |                         |                                        |          |               |                                                            |         |         |         |         |     |     |     |     |  |  |                                                    |     | neg   |         |           |         |         |         |         |         |          |       |  |                                   |     |  |                                                    |         |         |     |     |  |  |  |  |
|                         |                  |                        | fecal       | 1021        | 1-Nov-05                     |                              |                                  |         |         |         |                       |          |                         |                                        |          |               |                                                            |         |         |         |         |     |     |     |     |  |  |                                                    |     | neg   |         |           |         |         |         |         |         |          |       |  |                                   |     |  |                                                    |         |         |     |     |  |  |  |  |
| fecal                   | 1022             | 14-Mar-06              | neg         |             |                              |                              |                                  |         |         |         |                       |          |                         |                                        |          |               |                                                            |         |         |         |         |     |     |     |     |  |  |                                                    |     |       |         |           |         |         |         |         |         |          |       |  |                                   |     |  |                                                    |         |         |     |     |  |  |  |  |
| fecal                   | 1368             | 26-Jan-07              | neg         |             |                              |                              |                                  |         |         |         |                       |          |                         |                                        |          |               |                                                            |         |         |         |         |     |     |     |     |  |  |                                                    |     |       |         |           |         |         |         |         |         |          |       |  |                                   |     |  |                                                    |         |         |     |     |  |  |  |  |
| fecal                   | 1362             | 27-Jan-07              | neg         |             |                              |                              |                                  |         |         |         |                       |          |                         |                                        |          |               |                                                            |         |         |         |         |     |     |     |     |  |  |                                                    |     |       |         |           |         |         |         |         |         |          |       |  |                                   |     |  |                                                    |         |         |     |     |  |  |  |  |
| fecal                   | 1156             | 7-Feb-07               | neg         |             |                              |                              |                                  |         |         |         |                       |          |                         |                                        |          |               |                                                            |         |         |         |         |     |     |     |     |  |  |                                                    |     |       |         |           |         |         |         |         |         |          |       |  |                                   |     |  |                                                    |         |         |     |     |  |  |  |  |
| fecal                   | 1311             | 16-Jun-07              | neg         |             |                              |                              |                                  |         |         |         |                       |          |                         |                                        |          |               |                                                            |         |         |         |         |     |     |     |     |  |  |                                                    |     |       |         |           |         |         |         |         |         |          |       |  |                                   |     |  |                                                    |         |         |     |     |  |  |  |  |
| fecal                   | 1331             | 1-Mar-08               | neg         |             |                              |                              |                                  |         |         |         |                       |          |                         |                                        |          |               |                                                            |         |         |         |         |     |     |     |     |  |  |                                                    |     |       |         |           |         |         |         |         |         |          |       |  |                                   |     |  |                                                    |         |         |     |     |  |  |  |  |
| fecal                   | 1406             | 14-Jul-08              | neg         |             |                              |                              |                                  |         |         |         |                       |          |                         |                                        |          |               |                                                            |         |         |         |         |     |     |     |     |  |  |                                                    |     |       |         |           |         |         |         |         |         |          |       |  |                                   |     |  |                                                    |         |         |     |     |  |  |  |  |

| Individual <sup>1</sup> | Sex <sup>2</sup> | Community <sup>3</sup> | Sample type | Sample Code | Collection Date <sup>4</sup> | mtDNA haplotype <sup>5</sup> | Microsatellite Loci <sup>6</sup> |           |         |         | urine WB <sup>7</sup> | fecal WB | fecal vRNA <sup>8</sup> | GenBank accession numbers <sup>9</sup> |          |               | Birth and Death Dates with Immigration Notes <sup>10</sup>           |         |         |                 |         |         |         |         |          |          |       |  |  |  |  |                 |
|-------------------------|------------------|------------------------|-------------|-------------|------------------------------|------------------------------|----------------------------------|-----------|---------|---------|-----------------------|----------|-------------------------|----------------------------------------|----------|---------------|----------------------------------------------------------------------|---------|---------|-----------------|---------|---------|---------|---------|----------|----------|-------|--|--|--|--|-----------------|
|                         |                  |                        |             |             |                              |                              | D18s536                          | D4s243    | D10s676 | D9s922  |                       |          |                         | pol                                    | gp41/nef | SIVcpz Strain |                                                                      |         |         |                 |         |         |         |         |          |          |       |  |  |  |  |                 |
| Ch-031<br>(Con't)       |                  | KK                     | fecal       | 1452        | 15-Oct-08                    |                              | 157/161                          | 196/231   | 182/186 | 286/302 | neg                   |          |                         |                                        |          |               |                                                                      |         |         |                 |         |         |         |         |          |          |       |  |  |  |  |                 |
|                         |                  |                        | fecal       | 1451        | 27-Oct-08                    |                              | 157/161                          | 196/231   | 182/186 | 286/302 |                       |          |                         |                                        |          |               |                                                                      |         |         |                 |         |         |         |         |          |          |       |  |  |  |  |                 |
|                         |                  |                        | fecal       | 1445        | 9-Nov-08                     |                              | 157/161                          | 196/231   | 182/186 | 286/302 |                       |          |                         |                                        |          |               |                                                                      |         |         |                 |         |         |         |         |          |          |       |  |  |  |  |                 |
| Ch-032                  | F                | KK                     | fecal       | 83          | 25-Dec-01                    | 11                           | 161/173                          | 196/200   | 190/190 |         |                       |          |                         |                                        |          |               | DOB (22-Apr-89)                                                      |         |         |                 |         |         |         |         |          |          |       |  |  |  |  |                 |
|                         |                  |                        | fecal       | 61          | 30-Dec-01                    |                              |                                  |           |         |         |                       |          |                         |                                        |          |               |                                                                      |         |         |                 |         |         |         |         |          |          |       |  |  |  |  |                 |
|                         |                  |                        | urine       | 41          | 22-Jan-02                    |                              |                                  |           |         |         |                       |          |                         |                                        |          |               |                                                                      | neg     |         |                 |         |         |         |         |          |          |       |  |  |  |  |                 |
|                         |                  |                        | urine       | 271         | 25-Jan-02                    |                              |                                  |           |         |         |                       |          |                         |                                        |          |               |                                                                      | neg     |         |                 |         |         |         |         |          |          |       |  |  |  |  |                 |
|                         |                  |                        | urine       | 173         | 18-Feb-02                    |                              |                                  |           |         |         |                       |          |                         |                                        |          |               |                                                                      | neg     |         |                 |         |         |         |         |          |          |       |  |  |  |  |                 |
|                         |                  |                        | fecal       | 189         | 18-May-02                    |                              |                                  |           |         |         |                       |          |                         |                                        |          |               |                                                                      | neg     | neg     |                 |         |         |         |         |          |          |       |  |  |  |  |                 |
|                         |                  |                        | urine       | 151         | 18-May-02                    |                              |                                  |           |         |         |                       |          |                         |                                        |          |               |                                                                      |         |         |                 |         |         |         |         |          |          |       |  |  |  |  |                 |
|                         |                  |                        | fecal       | 164         | 3-Jun-02                     |                              |                                  |           |         |         |                       |          |                         |                                        |          |               |                                                                      | neg     |         |                 |         |         |         |         |          |          |       |  |  |  |  |                 |
|                         |                  |                        | urine       | 272         | 4-Aug-02                     |                              |                                  |           |         |         |                       |          |                         |                                        |          |               |                                                                      | neg     |         |                 |         |         |         |         |          |          |       |  |  |  |  |                 |
|                         |                  |                        | urine       | 270         | 9-Oct-02                     |                              |                                  |           |         |         |                       |          |                         |                                        |          |               |                                                                      | neg     |         |                 |         |         |         |         |          |          |       |  |  |  |  |                 |
|                         |                  |                        | urine       | 600         | 16-Jan-03                    |                              |                                  |           |         |         |                       |          |                         |                                        |          |               |                                                                      | neg     |         |                 |         |         |         |         |          |          |       |  |  |  |  |                 |
|                         |                  |                        | fecal       | 336         | 7-Aug-03                     |                              |                                  |           |         |         |                       |          |                         |                                        |          |               |                                                                      | 161/173 | 196/200 | 190/190         | neg     |         |         |         |          |          |       |  |  |  |  |                 |
|                         |                  |                        | urine       | 532         | 20-Aug-03                    |                              |                                  |           |         |         |                       |          |                         |                                        |          |               |                                                                      | neg     |         |                 |         |         |         |         |          |          |       |  |  |  |  |                 |
|                         |                  |                        | fecal       | 463         | 29-Mar-04                    |                              |                                  |           |         |         |                       |          |                         |                                        |          |               |                                                                      | neg     |         |                 |         |         |         |         |          |          |       |  |  |  |  |                 |
|                         |                  |                        | fecal       | 464         | 16-Jul-04                    |                              |                                  |           |         |         |                       |          |                         |                                        |          |               |                                                                      | neg     |         |                 |         |         |         |         |          |          |       |  |  |  |  |                 |
|                         |                  |                        | fecal       | 686         | 23-Jul-04                    |                              |                                  |           |         |         |                       |          |                         |                                        |          |               |                                                                      | neg     |         |                 |         |         |         |         |          |          |       |  |  |  |  |                 |
|                         |                  |                        | fecal       | 746         | 9-May-05                     |                              |                                  |           |         |         |                       |          |                         |                                        |          |               |                                                                      | 161/173 | 196/200 | 190/190         | 302/306 | neg     |         |         |          |          |       |  |  |  |  |                 |
| fecal                   | 1314             | 8-Jan-08               | 161/173     | 196/200     | 190/190                      | 302/306                      | neg                              |           |         |         |                       |          |                         |                                        |          |               |                                                                      |         |         |                 |         |         |         |         |          |          |       |  |  |  |  |                 |
| fecal                   | 1408             | 11-Jul-08              | 161/173     | 196/200     | 190/190                      | 302/306                      | neg                              |           |         |         |                       |          |                         |                                        |          |               |                                                                      |         |         |                 |         |         |         |         |          |          |       |  |  |  |  |                 |
| fecal                   | 846              | na                     | 161/173     | 196/200     | 190/190                      | 302/306                      | neg                              |           |         |         |                       |          |                         |                                        |          |               |                                                                      |         |         |                 |         |         |         |         |          |          |       |  |  |  |  |                 |
| Ch-033                  | F                | KK                     | fecal       | 27          | 23-Oct-01                    | 11                           | 141/157                          | 200/231   | 182/190 | 286/302 | pos                   | neg      |                         |                                        |          |               | DOB (2-Jul-85)*<br>First arrived in KK (6-Feb-98)                    |         |         |                 |         |         |         |         |          |          |       |  |  |  |  |                 |
|                         |                  |                        | fecal       | 97          | 4-Jan-02                     |                              |                                  |           |         |         |                       |          |                         |                                        |          |               |                                                                      | 11      | 141/157 | 200/231         | 182/190 | 286/302 | pos     |         |          |          |       |  |  |  |  |                 |
|                         |                  |                        | urine       | u356        | 15-May-03                    |                              |                                  |           |         |         |                       |          |                         |                                        |          |               |                                                                      | pos     |         |                 |         |         |         |         |          |          |       |  |  |  |  |                 |
|                         |                  |                        | fecal       | 688         | 6-Sep-04                     |                              |                                  |           |         |         |                       |          |                         |                                        |          |               |                                                                      | 11      | 141/157 |                 | 182/190 | 286/302 | pos     |         |          |          |       |  |  |  |  |                 |
|                         |                  |                        | fecal       | 1028        | 13-Dec-04                    |                              |                                  |           |         |         |                       |          |                         |                                        |          |               |                                                                      |         |         |                 |         |         |         | pos     |          |          |       |  |  |  |  |                 |
|                         |                  |                        | fecal       | 815         | 12-Jul-05                    |                              |                                  |           |         |         |                       |          |                         |                                        |          |               |                                                                      | 11      | 141/157 | 200/231         | 182/190 | 286/302 | pos     | pos     | FJ895384 | TAN16    |       |  |  |  |  |                 |
|                         |                  |                        | fecal       | 1029        | 31-Jan-06                    |                              |                                  |           |         |         |                       |          |                         |                                        |          |               |                                                                      |         |         |                 |         |         |         |         |          |          | pos   |  |  |  |  |                 |
|                         |                  |                        | fecal       | 1030        | 23-Feb-06                    |                              |                                  |           |         |         |                       |          |                         |                                        |          |               |                                                                      |         |         |                 |         |         |         |         |          |          | pos   |  |  |  |  |                 |
|                         |                  |                        | fecal       | 1320        | 9-Aug-07                     |                              |                                  |           |         |         |                       |          |                         |                                        |          |               |                                                                      | 141/157 | 200/231 | 182/190         | 286/302 | pos     |         |         |          |          |       |  |  |  |  |                 |
|                         |                  |                        | Ch-034      | M           | KK                           |                              |                                  |           |         |         |                       |          |                         |                                        |          |               |                                                                      | fecal   | 52      | 9-Jan-02        | 11      | 169/173 | 200/204 | 190/194 | 268/302  | neg      | neg   |  |  |  |  | DOB (10-Jul-94) |
| urine                   | u81              | 20-Apr-02              |             |             |                              | neg                          |                                  |           |         |         |                       |          |                         |                                        |          |               |                                                                      |         |         |                 |         |         |         |         |          |          |       |  |  |  |  |                 |
| urine                   | u205             | 29-May-02              |             |             |                              | neg                          |                                  |           |         |         |                       |          |                         |                                        |          |               |                                                                      |         |         |                 |         |         |         |         |          |          |       |  |  |  |  |                 |
| urine                   | u204             | 12-Jun-02              |             |             |                              | neg                          |                                  |           |         |         |                       |          |                         |                                        |          |               |                                                                      |         |         |                 |         |         |         |         |          |          |       |  |  |  |  |                 |
| urine                   | u683             | 7-Aug-03               |             |             |                              | neg                          |                                  |           |         |         |                       |          |                         |                                        |          |               |                                                                      |         |         |                 |         |         |         |         |          |          |       |  |  |  |  |                 |
| fecal                   | 466              | 30-Mar-04              |             |             |                              | neg                          |                                  |           |         |         |                       |          |                         |                                        |          |               |                                                                      |         |         |                 |         |         |         |         |          |          |       |  |  |  |  |                 |
| fecal                   | 465              | 8-May-04               |             |             |                              | neg                          |                                  |           |         |         |                       |          |                         |                                        |          |               |                                                                      |         |         |                 |         |         |         |         |          |          |       |  |  |  |  |                 |
| fecal                   | 689              | 15-Aug-04              |             |             |                              | neg                          |                                  |           |         |         |                       |          |                         |                                        |          |               |                                                                      |         |         |                 |         |         |         |         |          |          |       |  |  |  |  |                 |
| fecal                   | 690              | 7-Dec-04               |             |             |                              | neg                          |                                  |           |         |         |                       |          |                         |                                        |          |               |                                                                      |         |         |                 |         |         |         |         |          |          |       |  |  |  |  |                 |
| fecal                   | 747              | 24-May-05              |             |             |                              | neg                          |                                  |           |         |         |                       |          |                         |                                        |          |               |                                                                      |         |         |                 |         |         |         |         |          |          |       |  |  |  |  |                 |
| fecal                   | 814              | 14-Sep-05              |             |             |                              | neg                          |                                  |           |         |         |                       |          |                         |                                        |          |               |                                                                      |         |         |                 |         |         |         |         |          |          |       |  |  |  |  |                 |
| fecal                   | 1027             | 5-Nov-05               |             |             |                              | 169/173                      | 200/204                          | 190/194   | 268/302 | neg     |                       |          |                         |                                        |          |               |                                                                      |         |         |                 |         |         |         |         |          |          |       |  |  |  |  |                 |
| fecal                   | 1315             | 15-Aug-07              |             |             |                              | 169/173                      | 200/204                          | 190/194   | 268/302 | neg     |                       |          |                         |                                        |          |               |                                                                      |         |         |                 |         |         |         |         |          |          |       |  |  |  |  |                 |
| fecal                   | 1517             | 18-Jul-08              |             |             |                              | 169/173                      | 200/204                          | 190/194   | 268/302 | neg     |                       |          |                         |                                        |          |               |                                                                      |         |         |                 |         |         |         |         |          |          |       |  |  |  |  |                 |
| Ch-035                  | M                | KK                     |             |             |                              | fecal                        | 43                               | 6-Jan-02  | 4       | 153/161 | 204/235               | 182/186  | 286/298                 | neg                                    | neg      |               |                                                                      |         |         | DOB (21-Oct-72) |         |         |         |         |          |          |       |  |  |  |  |                 |
|                         |                  |                        |             |             |                              | fecal                        | 60                               | 8-Jan-02  |         |         |                       |          |                         |                                        |          |               |                                                                      |         |         |                 |         |         |         |         |          |          |       |  |  |  |  |                 |
|                         |                  |                        |             |             |                              | urine                        | u73                              | 28-Mar-02 |         |         |                       |          |                         |                                        |          |               |                                                                      |         |         |                 |         |         |         |         |          |          |       |  |  |  |  |                 |
|                         |                  |                        | urine       | u74         | 23-Apr-02                    | neg                          |                                  |           |         |         |                       |          |                         |                                        |          |               |                                                                      |         |         |                 |         |         |         |         |          |          |       |  |  |  |  |                 |
|                         |                  |                        | fecal       | 194         | 6-Jul-02                     | 153/161                      | 204/235                          | 182/186   |         |         |                       |          |                         |                                        |          |               |                                                                      |         |         |                 | neg     |         |         |         |          |          |       |  |  |  |  |                 |
|                         |                  |                        | urine       | u689        | 23-Sep-03                    | neg                          |                                  |           |         |         |                       |          |                         |                                        |          |               |                                                                      |         |         |                 |         |         |         |         |          |          |       |  |  |  |  |                 |
|                         |                  |                        | fecal       | 469         | 30-Apr-04                    | neg                          |                                  |           |         |         |                       |          |                         |                                        |          |               |                                                                      |         |         |                 |         |         |         |         |          |          |       |  |  |  |  |                 |
|                         |                  |                        | fecal       | 470         | 16-Jun-04                    | neg                          |                                  |           |         |         |                       |          |                         |                                        |          |               |                                                                      |         |         |                 |         |         |         |         |          |          |       |  |  |  |  |                 |
|                         |                  |                        | fecal       | 538         | 5-Aug-04                     | 153/161                      | 204/235                          | 182/186   |         |         |                       |          |                         |                                        |          |               |                                                                      |         |         |                 | 286/298 | neg     |         |         |          |          |       |  |  |  |  |                 |
|                         |                  |                        | fecal       | 705         | 15-Aug-04                    | neg                          |                                  |           |         |         |                       |          |                         |                                        |          |               |                                                                      |         |         |                 |         |         |         |         |          |          |       |  |  |  |  |                 |
|                         |                  |                        | fecal       | 749         | 1-Mar-05                     | neg                          |                                  |           |         |         |                       |          |                         |                                        |          |               |                                                                      |         |         |                 |         |         |         |         |          |          |       |  |  |  |  |                 |
|                         |                  |                        | fecal       | 866         | 26-Sep-05                    | neg                          |                                  |           |         |         |                       |          |                         |                                        |          |               |                                                                      |         |         |                 |         |         |         |         |          |          |       |  |  |  |  |                 |
|                         |                  |                        | fecal       | 1034        | 19-Jan-06                    | neg                          |                                  |           |         |         |                       |          |                         |                                        |          |               |                                                                      |         |         |                 |         |         |         |         |          |          |       |  |  |  |  |                 |
|                         |                  |                        | fecal       | 1125        | 22-Jul-06                    | 153/161                      | 204/235                          | 182/186   |         |         |                       |          |                         |                                        |          |               |                                                                      |         |         |                 | 286/298 | neg     |         |         |          |          |       |  |  |  |  |                 |
|                         |                  |                        | fecal       | 1360        | 25-Jan-07                    | 153/161                      | 204/235                          | 182/186   |         |         |                       |          |                         |                                        |          |               |                                                                      |         |         |                 | 286/298 | neg     |         |         |          |          |       |  |  |  |  |                 |
|                         |                  |                        | fecal       | 1427        | 21-Apr-08                    | 153/161                      | 204/235                          | 182/186   |         |         |                       |          |                         |                                        |          |               |                                                                      |         |         |                 | 286/298 | neg     |         |         |          |          |       |  |  |  |  |                 |
|                         |                  |                        | fecal       | 1446        | 17-Oct-08                    | 153/161                      | 204/235                          | 182/186   |         |         |                       |          |                         |                                        |          |               |                                                                      |         |         |                 | 286/298 | neg     |         |         |          |          |       |  |  |  |  |                 |
| Ch-036                  | F                | KK                     | fecal       | 57          | 4-Jan-01                     | 8                            | 157/161                          | 196/200   | 182/186 | 298/302 | neg                   | neg      |                         |                                        |          |               | DOB (2-Jul-83)*<br>DOD (7-Nov-07)<br>First arrived in KK (19-Aug-97) |         |         |                 |         |         |         |         |          |          |       |  |  |  |  |                 |
|                         |                  |                        | fecal       | 90          | 6-Jan-02                     |                              |                                  |           |         |         |                       |          |                         |                                        |          |               |                                                                      | 8       |         |                 |         |         |         |         |          |          |       |  |  |  |  |                 |
|                         |                  |                        | urine       | u43         | 13-Feb-02                    |                              |                                  |           |         |         |                       |          |                         |                                        |          |               |                                                                      | neg     |         |                 |         |         |         |         |          |          |       |  |  |  |  |                 |
|                         |                  |                        | urine       | u251        | 13-Feb-02                    |                              |                                  |           |         |         |                       |          |                         |                                        |          |               |                                                                      | neg     |         |                 |         |         |         |         |          |          |       |  |  |  |  |                 |
|                         |                  |                        | urine       | u177        | 26-Mar-02                    |                              |                                  |           |         |         |                       |          |                         |                                        |          |               |                                                                      | neg     |         |                 |         |         |         |         |          |          |       |  |  |  |  |                 |
|                         |                  |                        | fecal       | 154         | 9-Aug-02                     |                              |                                  |           |         |         |                       |          |                         |                                        |          |               |                                                                      | 8       | 157/161 | 196/200         | 182/186 | 298/302 | neg     |         |          |          |       |  |  |  |  |                 |
|                         |                  |                        | urine       | u250        | 15-Dec-02                    |                              |                                  |           |         |         |                       |          |                         |                                        |          |               |                                                                      |         |         |                 |         |         |         | neg     |          |          |       |  |  |  |  |                 |
|                         |                  |                        | fecal       | 707         | 6-Sep-04                     |                              |                                  |           |         |         |                       |          |                         |                                        |          |               |                                                                      | 157/161 | 196/200 | 182/186         | 298/302 | neg     |         |         |          |          |       |  |  |  |  |                 |
|                         |                  |                        | fecal       | 708         | 10-Dec-04                    |                              |                                  |           |         |         |                       |          |                         |                                        |          |               |                                                                      | 157/161 | 196/200 | 182/186         | 298/302 | neg     |         |         |          |          |       |  |  |  |  |                 |
|                         |                  |                        | fecal       | 1037        | 15-Mar-06                    |                              |                                  |           |         |         |                       |          |                         |                                        |          |               |                                                                      | 8       | 157/161 | 196/200         | 182/186 | 298/302 | pos     | pos     | FJ895398 | FJ895386 | TAN10 |  |  |  |  |                 |
| fecal                   | 1325             | 28-Jun-07              | 157/161     | 196/200     | 182/186                      | 298/302                      | pos                              |           |         |         |                       |          |                         |                                        |          |               |                                                                      |         |         |                 |         |         |         |         |          |          |       |  |  |  |  |                 |
| Ch-037                  | M                | MT                     | urine       | u22         | 9-Sep-00                     |                              |                                  |           |         |         |                       |          |                         |                                        |          |               | DOB (2-Jul-71)*<br>DLS (10-Sep-01)                                   |         |         |                 |         |         |         |         |          |          |       |  |  |  |  |                 |
|                         |                  |                        | urine       | u23         | 9-Sep-00                     |                              |                                  |           |         |         |                       |          |                         |                                        |          |               |                                                                      | pos     |         |                 |         |         |         |         |          |          |       |  |  |  |  |                 |
|                         |                  |                        | urine       | u24         | 9-Sep-00                     |                              |                                  |           |         |         |                       |          |                         |                                        |          |               |                                                                      | pos     |         |                 |         |         |         |         |          |          |       |  |  |  |  |                 |
|                         |                  |                        | urine       | u25         | 9-Sep-00                     |                              |                                  |           |         |         |                       |          |                         |                                        |          |               |                                                                      | pos     |         |                 |         |         |         |         |          |          |       |  |  |  |  |                 |
| Ch-038                  | F                | MT                     | fecal       | 34          | 26-Nov-01                    | 2                            | 157/173                          | 204/235   | 182/190 | 294/298 | neg                   | neg      |                         |                                        |          |               | DOB (4-Apr-92)<br>DLS (25-Jun-03)                                    |         |         |                 |         |         |         |         |          |          |       |  |  |  |  |                 |
|                         |                  |                        | fecal       | 109         | 26-Dec-01                    |                              |                                  |           |         |         |                       |          |                         |                                        |          |               |                                                                      |         |         |                 |         |         |         |         |          |          |       |  |  |  |  |                 |
|                         |                  |                        | urine       | u101        | 8-Mar-02                     |                              |                                  |           |         |         |                       |          |                         |                                        |          |               |                                                                      | neg     |         |                 |         |         |         |         |          |          |       |  |  |  |  |                 |
| fecal                   | 218              | 3-Aug-02               | 2           | 157/173     | 204/235                      | 182/190                      | 294/298                          | neg       |         |         |                       |          |                         |                                        |          |               |                                                                      |         |         |                 |         |         |         |         |          |          |       |  |  |  |  |                 |
| Ch-039                  | F                | MT                     | fecal       | 106         | 27-Dec-01                    | 12                           | 141/153                          | 200/204   | 186/186 | 286/298 | neg                   | neg      |                         |                                        |          |               | DOB (2-Jul-92)*                                                      |         |         |                 |         |         |         |         |          |          |       |  |  |  |  |                 |
|                         |                  |                        | fecal       | 177         | 27-Jan-02                    |                              |                                  |           |         |         |                       |          |                         |                                        |          |               |                                                                      | 12      |         |                 |         |         |         |         |          |          |       |  |  |  |  |                 |
|                         |                  |                        | fecal       | 134         | 25-Mar-02                    |                              |                                  |           |         |         |                       |          |                         |                                        |          |               |                                                                      | 12      | 141/153 | 200/204         | 186/186 | 286/298 | neg     |         |          |          |       |  |  |  |  |                 |





| Individual <sup>1</sup> | Sex <sup>2</sup> | Community <sup>3</sup> | Sample type | Sample Code | Collection Date <sup>4</sup> | mtDNA haplotype <sup>5</sup> | Microsatellite Loci <sup>6</sup> |           |         |         | urine WB <sup>7</sup> | fecal WB | fecal vRNA <sup>8</sup> | GenBank accession numbers <sup>9</sup> |          | SIVcpz Strain | Birth and Death Dates with Immigration Notes <sup>10</sup> |  |  |                                                   |
|-------------------------|------------------|------------------------|-------------|-------------|------------------------------|------------------------------|----------------------------------|-----------|---------|---------|-----------------------|----------|-------------------------|----------------------------------------|----------|---------------|------------------------------------------------------------|--|--|---------------------------------------------------|
|                         |                  |                        |             |             |                              |                              | D18s536                          | D4s243    | D10s676 | D9s922  |                       |          |                         | pol                                    | gp41/nef |               |                                                            |  |  |                                                   |
| Ch-045<br>(Con't)       |                  | MT                     | fecal       | 476         | 16-Mar-04                    | 8                            | 141/161                          | 200/204   | 182/182 | 268/268 |                       | pos      | neg                     |                                        |          |               |                                                            |  |  |                                                   |
|                         |                  |                        | fecal       | 513         | 18-Mar-04                    |                              |                                  |           |         |         |                       |          | pos                     | neg                                    |          |               |                                                            |  |  |                                                   |
|                         |                  |                        | fecal       | 514         | 23-Mar-04                    |                              |                                  |           |         |         |                       |          | pos                     | neg                                    |          |               |                                                            |  |  |                                                   |
|                         |                  |                        | fecal       | 515         | 7-May-04                     | 8                            | 141/161                          | 200/204   | 182/182 | 268/268 |                       |          | pos                     | neg                                    |          |               |                                                            |  |  |                                                   |
|                         |                  |                        | fecal       | 520         | 8-May-04                     |                              |                                  |           |         |         |                       |          | pos                     | neg                                    |          |               |                                                            |  |  |                                                   |
|                         |                  |                        | fecal       | 516         | 10-Jun-04                    |                              |                                  |           |         |         |                       |          | pos                     | neg                                    |          |               |                                                            |  |  |                                                   |
|                         |                  |                        | fecal       | 517         | 11-Jun-04                    |                              |                                  |           |         |         |                       |          | pos                     | neg                                    |          |               |                                                            |  |  |                                                   |
|                         |                  |                        | fecal       | 499         | 15-Jun-04                    | 8                            | 141/161                          | 200/204   | 182/182 | 268/268 |                       |          | pos                     | neg                                    |          |               |                                                            |  |  |                                                   |
|                         |                  |                        | fecal       | 518         | 15-Jun-04                    |                              |                                  |           |         |         |                       |          | pos                     | neg                                    |          |               |                                                            |  |  |                                                   |
|                         |                  |                        | fecal       | 701         | 17-Jul-04                    | 8                            | 141/161                          | 200/204   | 182/182 | 268/268 |                       |          | pos                     | neg                                    |          |               |                                                            |  |  |                                                   |
|                         |                  |                        | fecal       | 702         | 27-Sep-04                    | 8                            | 141/161                          | 200/204   | 182/182 | 268/268 |                       |          | pos                     | neg                                    |          |               |                                                            |  |  |                                                   |
|                         |                  |                        | fecal       | 703         | 15-Oct-04                    | 8                            | 141/161                          | 200/204   | 182/182 | 268/268 |                       |          | pos                     | neg                                    |          |               |                                                            |  |  |                                                   |
|                         |                  |                        | fecal       | 704         | 27-Nov-04                    | 8                            | 141/161                          | 200/204   | 182/182 | 268/268 |                       |          | pos                     | neg                                    |          |               |                                                            |  |  |                                                   |
|                         |                  |                        | Ch-046      | F           | MT                           | fecal                        | 225                              | 16-May-02 | 6       | 141/161 | 204/235               | 190/194  | 298/306                 |                                        |          | neg           |                                                            |  |  | DOB (8-Feb-85)<br>First arrived in MT (12-Jan-96) |
| urine                   | u253             | 16-May-02              |             |             |                              |                              |                                  |           |         |         | neg                   |          |                         |                                        |          |               |                                                            |  |  |                                                   |
| urine                   | u370             | 29-May-03              |             |             |                              |                              |                                  |           |         |         | neg                   |          |                         |                                        |          |               |                                                            |  |  |                                                   |
| fecal                   | 284              | 30-Aug-03              |             |             |                              | 6                            | 141/161                          | 204/235   | 190/194 | 298/306 |                       |          | neg                     |                                        |          |               |                                                            |  |  |                                                   |
| fecal                   | 492              | 2-Apr-04               |             |             |                              |                              |                                  |           |         |         |                       |          | neg                     |                                        |          |               |                                                            |  |  |                                                   |
| fecal                   | 493              | 7-Apr-04               |             |             |                              |                              |                                  |           |         |         |                       |          | neg                     |                                        |          |               |                                                            |  |  |                                                   |
| fecal                   | 494              | 18-Apr-04              |             |             |                              |                              |                                  |           |         |         |                       |          | neg                     |                                        |          |               |                                                            |  |  |                                                   |
| fecal                   | 495              | 3-May-04               |             |             |                              |                              |                                  |           |         |         |                       |          | neg                     |                                        |          |               |                                                            |  |  |                                                   |
| fecal                   | 496              | 3-May-04               |             |             |                              |                              |                                  |           |         |         |                       |          | neg                     |                                        |          |               |                                                            |  |  |                                                   |
| fecal                   | 497              | 21-Jun-04              |             |             |                              |                              |                                  |           |         |         |                       |          | neg                     |                                        |          |               |                                                            |  |  |                                                   |
| fecal                   | 498              | 22-Jun-04              |             |             |                              |                              | 141/161                          | 204/235   | 190/194 | 298/306 |                       |          | neg                     |                                        |          |               |                                                            |  |  |                                                   |
| fecal                   | 631              | 11-Dec-04              |             |             |                              |                              |                                  |           |         |         |                       |          | neg                     |                                        |          |               |                                                            |  |  |                                                   |
| fecal                   | 1064             | 9-Dec-05               |             |             |                              |                              |                                  |           |         |         |                       |          | neg                     |                                        |          |               |                                                            |  |  |                                                   |
| fecal                   | 1065             | 7-Feb-06               |             |             |                              |                              |                                  |           |         |         |                       |          | neg                     |                                        |          |               |                                                            |  |  |                                                   |
| fecal                   | 1198             | 5-Apr-07               |             |             |                              |                              | 141/161                          | 204/235   | 190/194 | 298/306 |                       |          | neg                     |                                        |          |               |                                                            |  |  |                                                   |
| fecal                   | 1239             | 11-Sep-07              |             |             |                              |                              |                                  |           |         |         |                       |          | neg                     |                                        |          |               |                                                            |  |  |                                                   |
| fecal                   | 1390             | 26-Feb-08              |             |             |                              |                              | 141/161                          | 204/235   | 190/194 | 298/306 |                       |          | neg                     |                                        |          |               |                                                            |  |  |                                                   |
| fecal                   | 1352             | 13-Jul-08              |             |             |                              |                              | 141/161                          | 204/235   | 190/194 | 298/306 |                       |          | neg                     |                                        |          |               |                                                            |  |  |                                                   |
| fecal                   | 1506             | 17-Aug-08              |             |             |                              |                              | 141/161                          | 204/235   | 190/194 | 298/306 |                       |          | neg                     |                                        |          |               |                                                            |  |  |                                                   |
| fecal                   | 1486             | 18-Aug-08              |             |             |                              |                              | 141/161                          | 204/235   | 190/194 | 298/306 |                       |          | neg                     |                                        |          |               |                                                            |  |  |                                                   |
| fecal                   | 1484             | 8-Oct-08               |             | 141/161     | 204/235                      | 190/194                      | 298/306                          |           |         | neg     |                       |          |                         |                                        |          |               |                                                            |  |  |                                                   |
| fecal                   | 1505             | 19-Nov-08              |             | 141/161     | 204/235                      | 190/194                      | 298/306                          |           |         | neg     |                       |          |                         |                                        |          |               |                                                            |  |  |                                                   |
| Ch-047                  | F                | MT                     | fecal       | 23          | 17-Nov-01                    | 1                            | 141/161                          | 196/204   | 182/190 | 302/302 |                       |          | neg                     |                                        |          |               | DOB (2-Jul-80)*                                            |  |  |                                                   |
|                         |                  |                        | fecal       | 103         | 25-Dec-01                    |                              |                                  |           |         |         |                       | neg      |                         | neg                                    |          |               |                                                            |  |  |                                                   |
|                         |                  |                        | fecal       | 128         | 14-May-02                    |                              |                                  |           |         |         |                       | neg      |                         | neg                                    |          |               |                                                            |  |  |                                                   |
|                         |                  |                        | fecal       | 131         | 14-May-02                    |                              |                                  |           |         |         |                       | neg      |                         | neg                                    |          |               |                                                            |  |  |                                                   |
|                         |                  |                        | fecal       | 130         | 20-May-02                    | 1                            | 141/161                          | 196/204   | 182/190 | 302/302 |                       |          | neg                     |                                        | neg      |               |                                                            |  |  |                                                   |
|                         |                  |                        | fecal       | 174         | 5-Aug-02                     |                              |                                  |           |         |         |                       | neg      |                         | neg                                    |          |               |                                                            |  |  |                                                   |
|                         |                  |                        | fecal       | 351         | 28-Oct-03                    | 1                            | 141/161                          | 196/204   | 182/190 | 302/302 |                       |          | neg                     |                                        |          |               |                                                            |  |  |                                                   |
|                         |                  |                        | urine       | u777        | 7-Feb-04                     |                              |                                  |           |         |         | neg                   |          |                         |                                        |          |               |                                                            |  |  |                                                   |
|                         |                  |                        | fecal       | 763         | 8-Apr-05                     |                              | 141/161                          | 196/204   | 182/190 | 302/302 |                       |          | neg                     |                                        |          |               |                                                            |  |  |                                                   |
|                         |                  |                        | fecal       | 834         | 3-Sep-05                     |                              |                                  |           |         |         |                       |          | neg                     |                                        |          |               |                                                            |  |  |                                                   |
|                         |                  |                        | fecal       | 1073        | 10-Dec-05                    |                              |                                  |           |         |         |                       |          | neg                     |                                        |          |               |                                                            |  |  |                                                   |
|                         |                  |                        | fecal       | 1109        | 22-Jun-06                    |                              | 141/161                          | 196/204   | 182/190 | 302/302 |                       |          | neg                     |                                        |          |               |                                                            |  |  |                                                   |
|                         |                  |                        | fecal       | 1422        | 20-Apr-07                    |                              | 141/161                          | 196/204   | 182/190 | 302/302 |                       |          | neg                     |                                        |          |               |                                                            |  |  |                                                   |
|                         |                  |                        | fecal       | 1330        | 2-Mar-08                     |                              | 141/161                          | 196/204   | 182/190 | 302/302 |                       |          | neg                     |                                        |          |               |                                                            |  |  |                                                   |
|                         |                  |                        | fecal       | 1404        | 17-May-08                    |                              | 141/161                          | 196/204   | 182/190 | 302/302 |                       |          | neg                     |                                        |          |               |                                                            |  |  |                                                   |
|                         |                  |                        | fecal       | 1259        | na                           |                              |                                  |           |         |         |                       |          | neg                     |                                        |          |               |                                                            |  |  |                                                   |
|                         |                  |                        | Ch-048      | M           | MT                           | fecal                        | 107                              | 23-Dec-01 | 13      | 161/173 | 231/235               | 186/190  | 302/306                 |                                        |          | neg           |                                                            |  |  | DOB (2-Jul-86)*                                   |
|                         |                  |                        |             |             |                              | fecal                        | 101                              | 10-Jan-02 | 13      | 161/173 | 231/235               | 186/190  | 302/306                 |                                        |          | neg           |                                                            |  |  |                                                   |
| fecal                   | 123              | 27-Jan-02              |             |             |                              | 13                           | 161/173                          | 231/235   | 186/190 | 302/306 |                       |          | neg                     |                                        |          |               |                                                            |  |  |                                                   |
| fecal                   | 285              | 29-Oct-03              |             |             |                              | 13                           | 161/173                          | 231/235   | 186/190 | 302/306 |                       |          | pos                     |                                        |          |               |                                                            |  |  |                                                   |
| fecal                   | 502              | 24-Mar-04              |             |             |                              |                              |                                  |           |         |         |                       |          | pos                     |                                        |          |               |                                                            |  |  |                                                   |
| fecal                   | 503              | 27-Mar-04              |             |             |                              |                              |                                  |           |         |         |                       |          | pos                     |                                        |          |               |                                                            |  |  |                                                   |
| fecal                   | 504              | 5-May-04               |             |             |                              | 13                           | 161/173                          | 231/235   | 186/190 | 302/306 |                       |          | pos                     |                                        |          |               |                                                            |  |  |                                                   |
| fecal                   | 505              | 8-May-04               |             |             |                              |                              |                                  |           |         |         |                       |          | pos                     |                                        |          |               |                                                            |  |  |                                                   |
| fecal                   | 506              | 15-May-04              |             |             |                              |                              |                                  |           |         |         |                       |          | pos                     |                                        |          |               |                                                            |  |  |                                                   |
| fecal                   | 507              | 17-May-04              |             |             |                              |                              |                                  |           |         |         |                       |          | pos                     |                                        |          |               |                                                            |  |  |                                                   |
| fecal                   | 508              | 13-Jun-04              |             |             |                              | 13                           | 161/173                          | 231/235   | 186/190 | 302/306 |                       |          | pos                     |                                        |          | FJ895404      | TAN15                                                      |  |  |                                                   |
| fecal                   | 670              | 20-Nov-04              |             |             |                              | 13                           | 161/173                          | 231/235   | 186/190 | 302/306 |                       |          | pos                     |                                        |          |               |                                                            |  |  |                                                   |
| fecal                   | 671              | 21-Nov-04              |             |             |                              | 13                           | 161/173                          | 231/235   | 186/190 | 302/306 |                       |          | pos                     | pos (pol)                              |          |               |                                                            |  |  |                                                   |
| fecal                   | 838              | 3-Aug-05               |             |             |                              |                              |                                  |           |         |         |                       |          | pos                     |                                        |          |               |                                                            |  |  |                                                   |
| fecal                   | 839              | 22-Aug-05              |             |             |                              |                              |                                  |           |         |         |                       |          | pos                     |                                        |          |               |                                                            |  |  |                                                   |
| fecal                   | 1078             | 17-Jan-06              |             |             |                              |                              |                                  |           |         |         |                       |          | pos                     |                                        |          |               |                                                            |  |  |                                                   |
| fecal                   | 1079             | 13-Feb-06              |             |             |                              |                              |                                  |           |         |         |                       |          | pos                     |                                        |          |               |                                                            |  |  |                                                   |
| fecal                   | 1081             | 8-Apr-06               |             |             |                              |                              |                                  |           |         |         |                       |          | pos                     |                                        |          |               |                                                            |  |  |                                                   |
| fecal                   | 1080             | 31-May-06              |             |             |                              |                              |                                  |           |         |         |                       |          | pos                     |                                        |          |               |                                                            |  |  |                                                   |
| fecal                   | 1201             | 7-Apr-07               |             |             |                              |                              | 161/173                          | 231/235   | 186/190 | 302/306 |                       |          | pos                     |                                        |          |               |                                                            |  |  |                                                   |
| fecal                   | 1275             | 15-Aug-07              |             | 161/173     | 231/235                      | 186/190                      | 302/306                          |           |         | pos     |                       |          |                         |                                        |          |               |                                                            |  |  |                                                   |
| fecal                   | 1377             | 29-May-08              |             | 161/173     | 231/235                      | 186/190                      | 302/306                          |           |         | pos     |                       |          |                         |                                        |          |               |                                                            |  |  |                                                   |
| fecal                   | 1483             | 25-Aug-08              |             | 161/173     | 231/235                      | 186/190                      | 302/306                          |           |         | pos     |                       |          |                         |                                        |          |               |                                                            |  |  |                                                   |
| fecal                   | 1514             | 19-Oct-08              |             | 161/173     | 231/235                      | 186/190                      | 302/306                          |           |         | pos     |                       |          |                         |                                        |          |               |                                                            |  |  |                                                   |
| Ch-049                  | F                | MT                     | fecal       | 124         | 24-Aug-02                    | 11                           | 141/153                          | 196/235   | 190/190 | 298/302 |                       |          | neg                     |                                        |          |               | DOB (2-Jul-65)*                                            |  |  |                                                   |
|                         |                  |                        | fecal       | 175         | 24-Aug-02                    |                              |                                  |           |         |         |                       | neg      |                         | neg                                    |          |               |                                                            |  |  |                                                   |
|                         |                  |                        | fecal       | 295         | 18-Oct-03                    |                              | 141/153                          | 196/235   | 190/190 | 298/302 |                       |          | neg                     |                                        |          |               |                                                            |  |  |                                                   |
|                         |                  |                        | fecal       | 622         | 12-Dec-04                    | 11                           | 141/153                          | 196/235   | 190/190 | 298/302 |                       |          | neg                     |                                        |          |               |                                                            |  |  |                                                   |
|                         |                  |                        | fecal       | 831         | 13-Sep-05                    | 11                           | 141/153                          | 196/235   | 190/190 | 298/302 |                       |          | neg                     |                                        |          |               |                                                            |  |  |                                                   |
|                         |                  |                        | fecal       | 1060        | 9-Dec-05                     |                              |                                  |           |         |         |                       |          | neg                     |                                        |          |               |                                                            |  |  |                                                   |
|                         |                  |                        | fecal       | 1179        | 11-Mar-07                    |                              |                                  |           |         |         |                       |          | neg                     |                                        |          |               |                                                            |  |  |                                                   |
|                         |                  |                        | fecal       | 1197        | 4-Apr-07                     |                              | 141/153                          | 196/235   | 190/190 | 298/302 |                       |          | neg                     |                                        |          |               |                                                            |  |  |                                                   |
|                         |                  |                        | fecal       | 1218        | 9-Sep-07                     |                              |                                  |           |         |         |                       |          | neg                     |                                        |          |               |                                                            |  |  |                                                   |
|                         |                  |                        | fecal       | 1329        | 22-Feb-08                    |                              | 141/153                          | 196/235   | 190/190 | 298/302 |                       |          | neg                     |                                        |          |               |                                                            |  |  |                                                   |
| fecal                   | 1410             | 11-Jul-08              |             | 141/153     | 196/235                      | 190/190                      | 298/302                          |           |         | neg     |                       |          |                         |                                        |          |               |                                                            |  |  |                                                   |

| Individual <sup>1</sup> | Sex <sup>2</sup> | Comm-unity <sup>3</sup> | Sample type | Sample Code | Collection Date <sup>4</sup> | mtDNA haplotype <sup>5</sup> | Microsatellite Loci <sup>6</sup> |         |         |         | urine WB <sup>7</sup> | fecal WB | fecal vRNA <sup>8</sup> | GenBank accession numbers <sup>9</sup> |                 |       | SIVcpz Strain                                     | Birth and Death Dates with Immigration Notes <sup>10</sup> |
|-------------------------|------------------|-------------------------|-------------|-------------|------------------------------|------------------------------|----------------------------------|---------|---------|---------|-----------------------|----------|-------------------------|----------------------------------------|-----------------|-------|---------------------------------------------------|------------------------------------------------------------|
|                         |                  |                         |             |             |                              |                              | D18s536                          | D4s243  | D10s676 | D9s922  |                       |          |                         | <i>pol</i>                             | <i>gp41/nef</i> |       |                                                   |                                                            |
| Ch-049<br>(Con't)       |                  | MT                      | fecal       | 1497        | 11-Oct-08                    |                              | 141/153                          | 196/235 | 190/190 | 298/302 |                       | neg      |                         |                                        |                 |       |                                                   |                                                            |
| Ch-050                  | F                | KK                      | fecal       | 1498        | 13-Nov-08                    |                              | 141/153                          | 196/235 | 190/190 | 298/302 |                       | neg      |                         |                                        |                 |       |                                                   |                                                            |
|                         |                  | KK                      | fecal       | 47          | 5-Jan-02                     | 3                            | 141/141                          | 200/204 | 186/186 | 302/306 |                       | neg      | neg                     |                                        |                 |       | DOB (2-Jul-78)*<br>First arrived in KK (3-Jan-91) |                                                            |
|                         |                  | KK                      | fecal       | 165         | 16-Jul-02                    | 3                            | 141/141                          | 200/204 | 186/186 | 302/306 |                       | neg      | neg                     |                                        |                 |       |                                                   |                                                            |
|                         |                  | KK                      | urine       | u174        | 16-Jul-02                    |                              |                                  |         |         |         | neg                   |          |                         |                                        |                 |       |                                                   |                                                            |
|                         |                  | KK                      | urine       | u249        | 5-Oct-02                     |                              |                                  |         |         |         | neg                   |          |                         |                                        |                 |       |                                                   |                                                            |
|                         |                  | KK                      | fecal       | 289         | 27-Aug-03                    | 3                            |                                  |         |         |         |                       | neg      |                         |                                        |                 |       |                                                   |                                                            |
|                         |                  | KK                      | urine       | u557        | 25-Dec-03                    |                              |                                  |         |         |         | neg                   |          |                         |                                        |                 |       |                                                   |                                                            |
|                         |                  | KK                      | fecal       | 693         | 15-Aug-04                    |                              |                                  |         |         |         |                       | neg      |                         |                                        |                 |       |                                                   |                                                            |
|                         |                  | KK                      | fecal       | 694         | 30-Nov-04                    |                              |                                  |         |         |         |                       | neg      |                         |                                        |                 |       |                                                   |                                                            |
|                         |                  | KK                      | fecal       | 1032        | 23-Dec-04                    |                              |                                  |         |         |         |                       | neg      |                         |                                        |                 |       |                                                   |                                                            |
|                         |                  | KK                      | fecal       | 817         | 19-Jun-05                    |                              |                                  |         |         |         |                       | neg      |                         |                                        |                 |       |                                                   |                                                            |
|                         |                  | KK                      | fecal       | 816         | 11-Jul-05                    |                              |                                  |         |         |         |                       | neg      |                         |                                        |                 |       |                                                   |                                                            |
|                         |                  | KK                      | fecal       | 1031        | 21-Jan-06                    |                              |                                  |         |         |         |                       | neg      |                         |                                        |                 |       |                                                   |                                                            |
|                         |                  | KK                      | fecal       | 1153        | 5-Feb-07                     |                              | 141/141                          | 200/204 | 186/186 | 302/306 |                       | neg      |                         |                                        |                 |       |                                                   |                                                            |
|                         |                  | KK                      | fecal       | 1455        | 7-Nov-08                     |                              | 141/141                          | 200/204 | 186/186 | 302/306 |                       | neg      |                         |                                        |                 |       |                                                   |                                                            |
| Ch-051                  | M                | KK                      | fecal       | 32          | 11-Nov-01                    |                              | 141/141                          | 200/204 | 186/186 | 302/306 |                       | neg      |                         |                                        |                 |       | DOB (9-Dec-96)                                    |                                                            |
|                         |                  | KK                      | fecal       | 98          | 21-Dec-01                    | 6                            | 141/161                          | 200/200 | 186/190 | 290/306 |                       | neg      | neg                     |                                        |                 |       |                                                   |                                                            |
|                         |                  | KK                      | urine       | u187        | 4-Jun-02                     |                              |                                  |         |         |         | neg                   |          |                         |                                        |                 |       |                                                   |                                                            |
|                         |                  | KK                      | urine       | u188        | 18-Jul-02                    |                              |                                  |         |         |         | neg                   |          |                         |                                        |                 |       |                                                   |                                                            |
|                         |                  | KK                      | urine       | u215        | 2-Nov-02                     |                              |                                  |         |         |         | neg                   |          |                         |                                        |                 |       |                                                   |                                                            |
|                         |                  | KK                      | urine       | u216        | 12-Nov-02                    |                              |                                  |         |         |         | neg                   |          |                         |                                        |                 |       |                                                   |                                                            |
|                         |                  | KK                      | fecal       | 638         | 22-Sep-04                    |                              |                                  |         |         |         |                       | neg      |                         |                                        |                 |       |                                                   |                                                            |
|                         |                  | KK                      | fecal       | 725         | 4-May-05                     |                              |                                  |         |         |         |                       | neg      |                         |                                        |                 |       |                                                   |                                                            |
|                         |                  | KK                      | fecal       | 791         | 12-Sep-05                    |                              |                                  |         |         |         |                       | neg      |                         |                                        |                 |       |                                                   |                                                            |
|                         |                  | KK                      | fecal       | 792         | 29-Oct-05                    |                              |                                  |         |         |         |                       | neg      |                         |                                        |                 |       |                                                   |                                                            |
|                         |                  | KK                      | fecal       | 1102        | 25-Jul-06                    |                              |                                  |         |         |         |                       | neg      |                         |                                        |                 |       |                                                   |                                                            |
|                         |                  | KK                      | fecal       | 1194        | 1-Apr-07                     |                              | 141/161                          | 200/200 | 186/190 | 290/306 |                       | neg      |                         |                                        |                 |       |                                                   |                                                            |
|                         |                  | KK                      | fecal       | 1386        | 12-Mar-08                    |                              | 141/161                          | 200/200 | 186/190 | 290/306 |                       | neg      |                         |                                        |                 |       |                                                   |                                                            |
|                         |                  | KK                      | fecal       | 1391        | 9-May-08                     |                              | 141/161                          | 200/200 | 186/190 | 290/306 |                       | neg      |                         |                                        |                 |       |                                                   |                                                            |
|                         |                  | KK                      | fecal       | 1507        | 21-Oct-08                    |                              | 141/161                          | 200/200 | 186/190 | 290/306 |                       | neg      |                         |                                        |                 |       |                                                   |                                                            |
|                         |                  | KK                      | fecal       | 1430        | na                           |                              | 141/161                          | 200/200 | 186/190 | 290/306 |                       | neg      |                         |                                        |                 |       |                                                   |                                                            |
| Ch-052                  | M                | KK                      | fecal       | 110         | 3-Jan-02                     | 3                            | 141/173                          | 200/204 | 186/194 | 302/302 |                       | neg      | neg                     |                                        |                 |       | DOB (24-Dec-93)                                   |                                                            |
|                         |                  | KK                      | fecal       | 710         | 15-Aug-04                    | 3                            | 141/173                          | 200/204 | 186/194 | 302/302 |                       | neg      | neg                     |                                        |                 |       |                                                   |                                                            |
|                         |                  | KK                      | fecal       | 1040        | 23-Dec-04                    | 3                            | 141/173                          | 200/204 | 186/194 | 302/302 |                       | neg      | neg                     |                                        |                 |       |                                                   |                                                            |
|                         |                  | KK                      | fecal       | 867         | 24-Oct-05                    | 3                            | 141/173                          | 200/204 | 186/194 | 302/302 |                       | pos      |                         |                                        |                 |       |                                                   |                                                            |
|                         |                  | KK                      | fecal       | 1041        | 11-Mar-06                    | 3                            | 141/173                          | 200/204 | 186/194 | 302/302 |                       | pos      |                         |                                        |                 |       |                                                   |                                                            |
|                         |                  | KK                      | fecal       | 1127        | 13-Jul-06                    | 3                            | 141/173                          | 200/204 | 186/194 | 302/302 |                       | pos      | pos                     | FJ895400                               | FJ895388        | TAN12 |                                                   |                                                            |
|                         |                  | KK                      | fecal       | 1150        | 30-Jan-07                    | 3                            | 141/173                          | 200/204 | 186/194 | 302/302 |                       | pos      |                         |                                        |                 |       |                                                   |                                                            |
|                         |                  | KK                      | fecal       | 1328        | 9-Jan-08                     | 3                            | 141/173                          | 200/204 | 186/194 | 302/302 |                       | pos      |                         |                                        |                 |       |                                                   |                                                            |
| Ch-053                  | F                | KK                      | fecal       | 111         | 30-Dec-01                    | 1                            | 141/173                          | 204/204 | 182/190 | 286/302 |                       | neg      | neg                     |                                        |                 |       | DOB (13-Jul-98)                                   |                                                            |
|                         |                  | KK                      | fecal       | 144         | 28-Apr-02                    | 1                            | 141/173                          | 204/204 | 182/190 | 286/302 |                       | neg      | neg                     |                                        |                 |       |                                                   |                                                            |
|                         |                  | KK                      | fecal       | 418         | 10-Jun-04                    |                              |                                  |         |         |         |                       | neg      |                         |                                        |                 |       |                                                   |                                                            |
|                         |                  | KK                      | fecal       | 419         | 11-Jul-04                    |                              |                                  |         |         |         |                       | neg      |                         |                                        |                 |       |                                                   |                                                            |
|                         |                  | KK                      | fecal       | 641         | 1-Oct-04                     |                              |                                  |         |         |         |                       | neg      |                         |                                        |                 |       |                                                   |                                                            |
|                         |                  | KK                      | fecal       | 730         | 15-Jan-05                    |                              |                                  |         |         |         |                       | neg      |                         |                                        |                 |       |                                                   |                                                            |
|                         |                  | KK                      | fecal       | 795         | 6-Jun-05                     |                              |                                  |         |         |         |                       | neg      |                         |                                        |                 |       |                                                   |                                                            |
|                         |                  | KK                      | fecal       | 787         | 11-Jul-05                    |                              |                                  |         |         |         |                       | neg      |                         |                                        |                 |       |                                                   |                                                            |
|                         |                  | KK                      | fecal       | 796         | 10-Oct-05                    |                              |                                  |         |         |         |                       | neg      |                         |                                        |                 |       |                                                   |                                                            |
|                         |                  | KK                      | fecal       | 984         | 5-Jun-06                     |                              |                                  |         |         |         |                       | neg      |                         |                                        |                 |       |                                                   |                                                            |
|                         |                  | KK                      | fecal       | 1106        | 31-Jul-06                    |                              | 141/173                          | 204/204 | 182/190 | 286/302 |                       | neg      |                         |                                        |                 |       |                                                   |                                                            |
|                         |                  | KK                      | fecal       | 1357        | 28-Jan-07                    |                              | 141/173                          | 204/204 | 182/190 | 286/302 |                       | neg      |                         |                                        |                 |       |                                                   |                                                            |
|                         |                  | KK                      | fecal       | 1244        | 9-Jan-08                     |                              | 141/173                          | 204/204 | 182/190 | 286/302 |                       | neg      |                         |                                        |                 |       |                                                   |                                                            |
| Ch-054                  | M                | KK                      | fecal       | 113         | 9-Jan-02                     | 5                            | 141/157                          | 231/235 | 158/186 | 286/298 |                       | neg      | neg                     |                                        |                 |       | DOB (24-May-96)                                   |                                                            |
|                         |                  | KK                      | fecal       | 149         | 28-May-02                    | 5                            | 141/157                          | 231/235 | 158/186 | 286/298 |                       | neg      | neg                     |                                        |                 |       |                                                   |                                                            |
|                         |                  | KK                      | urine       | u197        | 28-May-02                    |                              |                                  |         |         |         | neg                   |          |                         |                                        |                 |       |                                                   |                                                            |
|                         |                  | KK                      | urine       | u198        | 28-May-02                    |                              |                                  |         |         |         | neg                   |          |                         |                                        |                 |       |                                                   |                                                            |
|                         |                  | KK                      | urine       | u201        | 8-Jul-02                     |                              |                                  |         |         |         | neg                   |          |                         |                                        |                 |       |                                                   |                                                            |
|                         |                  | KK                      | urine       | u218        | 20-Jan-03                    |                              |                                  |         |         |         | neg                   |          |                         |                                        |                 |       |                                                   |                                                            |
|                         |                  | KK                      | urine       | u209        | 9-Feb-03                     |                              |                                  |         |         |         | neg                   |          |                         |                                        |                 |       |                                                   |                                                            |
|                         |                  | KK                      | fecal       | 1020        | 18-Dec-04                    |                              |                                  |         |         |         |                       | neg      |                         |                                        |                 |       |                                                   |                                                            |
|                         |                  | KK                      | fecal       | 812         | 16-Aug-05                    |                              |                                  |         |         |         |                       | neg      |                         |                                        |                 |       |                                                   |                                                            |
|                         |                  | KK                      | fecal       | 1019        | 25-Jan-06                    | 5                            | 141/157                          | 231/235 | 158/186 | 286/298 |                       | neg      |                         |                                        |                 |       |                                                   |                                                            |
|                         |                  | KK                      | fecal       | 1374        | 22-Jan-07                    |                              | 141/157                          | 231/235 | 158/186 | 286/298 |                       | neg      |                         |                                        |                 |       |                                                   |                                                            |
|                         |                  | KK                      | fecal       | 1403        | 26-Jan-08                    |                              | 141/157                          | 231/235 | 158/186 | 286/298 |                       | neg      |                         |                                        |                 |       |                                                   |                                                            |
|                         |                  | KK                      | fecal       | 1392        | 18-Jun-08                    |                              | 141/157                          | 231/235 | 158/186 | 286/298 |                       | neg      |                         |                                        |                 |       |                                                   |                                                            |
|                         |                  | KK                      | fecal       | 1387        | 21-Jun-08                    |                              | 141/157                          | 231/235 | 158/186 | 286/298 |                       | neg      |                         |                                        |                 |       |                                                   |                                                            |
|                         |                  | KK                      | fecal       | 1496        | 21-Oct-08                    |                              | 141/157                          | 231/235 | 158/186 | 286/298 |                       | neg      |                         |                                        |                 |       |                                                   |                                                            |
| Ch-055                  | F                | KK                      | fecal       | 119         | 4-Jan-02                     | 8                            | 157/161                          | 200/204 | 182/186 | 298/302 |                       | neg      | neg                     |                                        |                 |       | DOB (22-Jul-98)                                   |                                                            |
|                         |                  | KK                      | fecal       | 706         | 6-Sep-04                     | 8                            | 157/161                          | 200/204 | 182/186 | 298/302 |                       | neg      | neg                     |                                        |                 |       |                                                   |                                                            |
|                         |                  | KK                      | fecal       | 1036        | 27-Nov-04                    |                              |                                  |         |         |         |                       | neg      |                         |                                        |                 |       |                                                   |                                                            |
|                         |                  | KK                      | fecal       | 819         | 19-Jun-05                    | 8                            | 157/161                          | 200/204 | 182/186 | 298/302 |                       | neg      | neg                     |                                        |                 |       |                                                   |                                                            |
|                         |                  | KK                      | fecal       | 1035        | 14-Feb-06                    |                              |                                  |         |         |         |                       | neg      |                         |                                        |                 |       |                                                   |                                                            |
|                         |                  | KK                      | fecal       | 1126        | 19-Jul-06                    |                              | 157/161                          | 200/204 | 182/186 | 298/302 |                       | neg      |                         |                                        |                 |       |                                                   |                                                            |
|                         |                  | KK                      | fecal       | 1324        | 24-Jun-07                    |                              | 157/161                          | 200/204 | 182/186 | 298/302 |                       | neg      |                         |                                        |                 |       |                                                   |                                                            |
|                         |                  | KK                      | fecal       | 1424        | 13-Mar-08                    |                              | 157/161                          | 200/204 | 182/186 | 298/302 |                       | neg      |                         |                                        |                 |       |                                                   |                                                            |
|                         |                  | KK                      | fecal       | 1335        | 28-Apr-08                    |                              | 157/161                          | 200/204 | 182/186 | 298/302 |                       | neg      |                         |                                        |                 |       |                                                   |                                                            |
|                         |                  | KK                      | fecal       | 1385        | 4-Jun-08                     |                              | 157/161                          | 200/204 | 182/186 | 298/302 |                       | neg      |                         |                                        |                 |       |                                                   |                                                            |
|                         |                  | KK                      | fecal       | 1520        | 23-Oct-08                    |                              | 157/161                          | 200/204 | 182/186 | 298/302 |                       | neg      |                         |                                        |                 |       |                                                   |                                                            |
| Ch-056                  | M                | KK                      | fecal       | 122         | 6-Jan-02                     | 5                            | 157/173                          | 204/231 | 182/194 | 286/302 |                       | neg      | neg                     |                                        |                 |       | DOB (9-Jun-01)                                    |                                                            |
|                         |                  | KK                      | urine       | u199        | 3-Jun-02                     |                              |                                  |         |         |         | neg                   |          |                         |                                        |                 |       |                                                   |                                                            |
|                         |                  | KK                      | urine       | u200        | 3-Jun-02                     |                              |                                  |         |         |         | neg                   |          |                         |                                        |                 |       |                                                   |                                                            |
|                         |                  | KK                      | urine       | u214        | 7-Oct-02                     |                              |                                  |         |         |         | neg                   |          |                         |                                        |                 |       |                                                   |                                                            |
|                         |                  | KK                      | fecal       | 739         | 20-Jan-05                    | 5                            | 157/173                          | 204/231 | 182/194 | 286/302 |                       | neg      | neg                     |                                        |                 |       |                                                   |                                                            |
|                         |                  | KK                      | fecal       | 808         | 19-Jun-05                    |                              | 157/173                          | 204/231 | 182/194 | 286/302 |                       | neg      |                         |                                        |                 |       |                                                   |                                                            |
|                         |                  | KK                      | fecal       | 1012        | 14-Nov-05                    |                              | 157/173                          | 204/231 | 182/194 | 286/302 |                       | neg      |                         |                                        |                 |       |                                                   |                                                            |

| Individual <sup>1</sup> | Sex <sup>2</sup> | Community <sup>3</sup> | Sample type | Sample Code | Collection Date <sup>4</sup> | mtDNA haplotype <sup>5</sup> | Microsatellite Loci <sup>6</sup> |         |         |         | urine WB <sup>7</sup> | fecal WB | fecal vRNA <sup>8</sup> | GenBank accession numbers <sup>9</sup> |          | SIVcpz Strain | Birth and Death Dates with Immigration Notes <sup>10</sup> |
|-------------------------|------------------|------------------------|-------------|-------------|------------------------------|------------------------------|----------------------------------|---------|---------|---------|-----------------------|----------|-------------------------|----------------------------------------|----------|---------------|------------------------------------------------------------|
|                         |                  |                        |             |             |                              |                              | D18s536                          | D4s243  | D10s676 | D9s922  |                       |          |                         | pol                                    | gp41/nef |               |                                                            |
| Ch-056                  |                  | KK                     | fecal       | 1345        | 13-Mar-08                    |                              | 157/173                          | 204/231 | 182/194 | 286/302 | neg                   |          |                         |                                        |          |               |                                                            |
| (Con't)                 |                  | KK                     | fecal       | 1334        | 13-May-08                    |                              | 157/173                          | 204/231 | 182/194 | 286/302 | neg                   |          |                         |                                        |          |               |                                                            |
| Ch-057                  | F                | KK                     | fecal       | 187         | 28-Apr-02                    |                              | 141/161                          | 231/235 | 190/190 | 286/302 | neg                   |          |                         |                                        |          |               | DOB (2-Jul-73)*<br>First arrived in KK (9-Aug-85)          |
|                         |                  | KK                     | urine       | u46         | 28-Apr-02                    |                              |                                  |         |         |         | neg                   |          |                         |                                        |          |               |                                                            |
|                         |                  | KK                     | urine       | u47         | 28-Apr-02                    |                              |                                  |         |         |         | neg                   |          |                         |                                        |          |               |                                                            |
|                         |                  | KK                     | fecal       | 183         | 29-Apr-02                    |                              |                                  |         |         |         | neg                   |          |                         |                                        |          |               |                                                            |
|                         |                  | KK                     | urine       | u134        | 29-Apr-02                    |                              |                                  |         |         |         | neg                   |          |                         |                                        |          |               |                                                            |
|                         |                  | KK                     | urine       | u144        | 5-May-02                     |                              |                                  |         |         |         | neg                   |          |                         |                                        |          |               |                                                            |
|                         |                  | KK                     | urine       | u145        | 20-Jun-02                    |                              |                                  |         |         |         | neg                   |          |                         |                                        |          |               |                                                            |
|                         |                  | KK                     | fecal       | 140         | 10-Jul-02                    |                              |                                  |         |         |         |                       | neg      |                         |                                        |          |               |                                                            |
|                         |                  | KK                     | fecal       | 150         | 14-Jul-02                    |                              |                                  |         |         |         |                       | neg      |                         |                                        |          |               |                                                            |
|                         |                  | KK                     | fecal       | 153         | 14-Jul-02                    |                              |                                  |         |         |         |                       | neg      |                         |                                        |          |               |                                                            |
|                         |                  | KK                     | urine       | u133        | 28-Jul-02                    |                              |                                  |         |         |         | neg                   |          |                         |                                        |          |               |                                                            |
|                         |                  | KK                     | fecal       | 272         | 20-Nov-02                    |                              | 141/161                          | 231/235 | 190/190 | 286/302 |                       |          | neg                     |                                        |          |               |                                                            |
|                         |                  | KK                     | urine       | u500        | 27-Aug-03                    |                              |                                  |         |         |         | neg                   |          |                         |                                        |          |               |                                                            |
|                         |                  | KK                     | fecal       | 319         | 29-Aug-03                    |                              | 141/161                          | 231/235 | 190/190 | 286/302 |                       |          | neg                     |                                        |          |               |                                                            |
|                         |                  | KK                     | fecal       | 430         | 7-Jun-04                     |                              |                                  |         |         |         |                       |          | neg                     |                                        |          |               |                                                            |
|                         |                  | KK                     | fecal       | 650         | 8-Sep-04                     |                              |                                  |         |         |         |                       |          | neg                     |                                        |          |               |                                                            |
|                         |                  | KK                     | fecal       | 993         | 23-Dec-04                    |                              |                                  |         |         |         |                       |          | neg                     |                                        |          |               |                                                            |
|                         |                  | KK                     | fecal       | 799         | 16-Aug-05                    |                              |                                  |         |         |         |                       |          | neg                     |                                        |          |               |                                                            |
|                         |                  | KK                     | fecal       | 991         | 3-Mar-06                     |                              |                                  |         |         |         |                       |          | neg                     |                                        |          |               |                                                            |
|                         |                  | KK                     | fecal       | 992         | 31-May-06                    |                              |                                  |         |         |         |                       |          | neg                     |                                        |          |               |                                                            |
|                         |                  | KK                     | fecal       | 1157        | 7-Feb-07                     |                              | 141/161                          | 231/235 | 190/190 | 286/302 |                       |          | neg                     |                                        |          |               |                                                            |
|                         |                  | KK                     | fecal       | 1509        | 24-Nov-08                    | 9                            | 141/161                          | 231/235 | 190/190 | 286/302 |                       |          | neg                     |                                        |          |               |                                                            |
| Ch-058                  | M                | KK                     | fecal       | 186         | 24-Apr-02                    | 11                           | 141/173                          | 200/200 | 182/190 | 268/302 |                       | neg      |                         |                                        |          |               | DOB (1-Oct-99)                                             |
|                         |                  | KK                     | fecal       | 188         | 7-Jul-02                     | 11                           | 141/173                          | 200/200 | 182/190 | 268/302 |                       |          |                         |                                        |          |               |                                                            |
|                         |                  | KK                     | urine       | u202        | 11-Aug-02                    |                              |                                  |         |         |         | neg                   |          |                         |                                        |          |               |                                                            |
|                         |                  | KK                     | urine       | u203        | 12-Aug-02                    |                              |                                  |         |         |         | neg                   |          |                         |                                        |          |               |                                                            |
|                         |                  | KK                     | fecal       | 467         | 15-Jun-04                    |                              |                                  |         |         |         |                       |          | neg                     |                                        |          |               |                                                            |
|                         |                  | KK                     | fecal       | 468         | 14-Jul-04                    |                              |                                  |         |         |         |                       |          | neg                     |                                        |          |               |                                                            |
|                         |                  | KK                     | fecal       | 687         | 15-Aug-04                    |                              |                                  |         |         |         |                       |          | neg                     |                                        |          |               |                                                            |
|                         |                  | KK                     | fecal       | 696         | 13-Dec-04                    |                              |                                  |         |         |         |                       |          | neg                     |                                        |          |               |                                                            |
|                         |                  | KK                     | fecal       | 1033        | 23-Jan-06                    |                              |                                  |         |         |         |                       |          | neg                     |                                        |          |               |                                                            |
|                         |                  | KK                     | fecal       | 1123        | 13-Jul-06                    |                              |                                  |         |         |         |                       |          | neg                     |                                        |          |               |                                                            |
|                         |                  | KK                     | fecal       | 1182        | 12-Mar-07                    |                              | 141/173                          | 200/200 | 182/190 | 268/302 |                       |          | neg                     |                                        |          |               |                                                            |
|                         |                  | KK                     | fecal       | 1321        | 9-Jun-07                     |                              |                                  |         |         |         |                       |          | neg                     |                                        |          |               |                                                            |
|                         |                  | KK                     | fecal       | 1414        | 9-May-08                     |                              | 141/173                          | 200/200 | 182/190 | 268/302 |                       |          | neg                     |                                        |          |               |                                                            |
|                         |                  | KK                     | fecal       | 847         | na                           |                              |                                  |         |         |         |                       |          | neg                     |                                        |          |               |                                                            |
|                         |                  | KK                     | fecal       | 1429        | na                           |                              | 141/173                          | 200/200 | 182/190 | 268/302 |                       |          | neg                     |                                        |          |               |                                                            |
| Ch-059                  | M                | MT                     | fecal       | 287         | 20-Aug-03                    | 11                           | 141/141                          | 196/235 | 186/190 | 298/306 |                       |          |                         |                                        |          |               | DOB (2-Jul-89)*                                            |
|                         |                  | MT                     | fecal       | 481         | 25-Mar-04                    |                              |                                  |         |         |         |                       |          | neg                     |                                        |          |               |                                                            |
|                         |                  | MT                     | fecal       | 482         | 6-Apr-04                     |                              |                                  |         |         |         |                       |          | neg                     |                                        |          |               |                                                            |
|                         |                  | MT                     | fecal       | 483         | 8-Jun-04                     |                              |                                  |         |         |         |                       |          | neg                     |                                        |          |               |                                                            |
|                         |                  | MT                     | fecal       | 484         | 15-Jun-04                    |                              |                                  |         |         |         |                       |          | neg                     |                                        |          |               |                                                            |
|                         |                  | MT                     | fecal       | 485         | 24-Jun-04                    |                              |                                  |         |         |         |                       |          | neg                     |                                        |          |               |                                                            |
|                         |                  | MT                     | fecal       | 619         | 18-Jul-04                    |                              |                                  |         |         |         |                       |          | neg                     |                                        |          |               |                                                            |
|                         |                  | MT                     | fecal       | 1058        | 18-Dec-04                    |                              |                                  |         |         |         |                       |          | neg                     |                                        |          |               |                                                            |
|                         |                  | MT                     | fecal       | 766         | 11-Jan-05                    | 11                           | 141/141                          | 196/235 | 186/190 | 298/306 |                       |          | neg                     |                                        |          |               |                                                            |
|                         |                  | MT                     | fecal       | 852         | 19-May-05                    |                              |                                  |         |         |         |                       |          | neg                     |                                        |          |               |                                                            |
|                         |                  | MT                     | fecal       | 854         | 28-Aug-05                    |                              |                                  |         |         |         |                       |          | neg                     |                                        |          |               |                                                            |
|                         |                  | MT                     | fecal       | 855         | 9-Sep-05                     |                              |                                  |         |         |         |                       |          | neg                     |                                        |          |               |                                                            |
|                         |                  | MT                     | fecal       | 830         | 4-Oct-05                     | 11                           | 141/141                          | 196/235 | 186/190 | 298/306 |                       |          | neg                     |                                        |          |               |                                                            |
|                         |                  | MT                     | fecal       | 1059        | 20-Feb-06                    |                              |                                  |         |         |         |                       |          | neg                     |                                        |          |               |                                                            |
|                         |                  | MT                     | fecal       | 1200        | 7-Apr-07                     |                              | 141/141                          | 196/235 | 186/190 | 298/306 |                       |          | neg                     |                                        |          |               |                                                            |
|                         |                  | MT                     | fecal       | 1216        | 2-Aug-07                     |                              |                                  |         |         |         |                       |          | neg                     |                                        |          |               |                                                            |
|                         |                  | MT                     | fecal       | 1495        | 17-Jul-08                    |                              | 141/141                          | 196/235 | 186/190 | 298/306 |                       |          | neg                     |                                        |          |               |                                                            |
|                         |                  | MT                     | fecal       | 1494        | 10-Nov-08                    |                              | 141/141                          | 196/235 | 186/190 | 298/306 |                       |          | neg                     |                                        |          |               |                                                            |
| Ch-060                  | M                | KK                     | fecal       | 216         | 21-Aug-02                    | 11                           | 141/161                          | 196/231 | 190/190 | 290/302 |                       | neg      |                         |                                        |          |               | DOB (7-Mar-01)                                             |
|                         |                  | KK                     | fecal       | 691         | 22-Jul-04                    |                              |                                  |         |         |         |                       |          | neg                     |                                        |          |               |                                                            |
|                         |                  | KK                     | fecal       | 692         | 13-Aug-04                    |                              |                                  |         |         |         |                       |          | neg                     |                                        |          |               |                                                            |
|                         |                  | KK                     | fecal       | 748         | 9-May-05                     | 11                           | 141/161                          | 196/231 | 190/190 | 290/302 |                       |          | neg                     |                                        |          |               |                                                            |
|                         |                  | KK                     | fecal       | 864         | 15-Oct-05                    | 11                           | 141/161                          | 196/231 | 190/190 | 290/302 |                       |          | neg                     |                                        |          |               |                                                            |
|                         |                  | KK                     | fecal       | 1121        | 4-Jul-06                     |                              |                                  |         |         |         |                       |          | neg                     |                                        |          |               |                                                            |
|                         |                  | KK                     | fecal       | 1122        | 7-Oct-06                     |                              |                                  |         |         |         |                       |          | neg                     |                                        |          |               |                                                            |
|                         |                  | KK                     | fecal       | 1169        | 15-Feb-07                    |                              | 141/161                          | 196/231 | 190/190 | 290/302 |                       |          | neg                     |                                        |          |               |                                                            |
|                         |                  | KK                     | fecal       | 1317        | 9-Jun-07                     |                              |                                  |         |         |         |                       |          | neg                     |                                        |          |               |                                                            |
|                         |                  | KK                     | fecal       | 1318        | 17-Jan-08                    |                              |                                  |         |         |         |                       |          | neg                     |                                        |          |               |                                                            |
|                         |                  | KK                     | fecal       | 1395        | 10-May-08                    |                              | 141/161                          | 196/231 | 190/190 | 290/302 |                       |          | neg                     |                                        |          |               |                                                            |
| Ch-061                  | F                | KK                     | fecal       | 220         | 3-Aug-02                     | 3                            | 141/141                          | 196/204 | 182/186 | 290/306 |                       | neg      |                         |                                        |          |               | DOB (12-Nov-99)                                            |
|                         |                  | KK                     | fecal       | 709         | 15-Aug-04                    |                              |                                  |         |         |         |                       |          | neg                     |                                        |          |               |                                                            |
|                         |                  | KK                     | fecal       | 750         | 15-Jan-05                    |                              | 141/141                          | 196/204 | 182/186 | 290/306 |                       |          | neg                     |                                        |          |               |                                                            |
|                         |                  | KK                     | fecal       | 820         | 13-Aug-05                    |                              |                                  |         |         |         |                       |          | neg                     |                                        |          |               |                                                            |
|                         |                  | KK                     | fecal       | 1038        | 21-Jan-06                    |                              |                                  |         |         |         |                       |          | neg                     |                                        |          |               |                                                            |
|                         |                  | KK                     | fecal       | 1039        | 25-Mar-06                    |                              | 141/141                          | 196/204 | 182/186 | 290/306 |                       |          | neg                     |                                        |          |               |                                                            |
|                         |                  | KK                     | fecal       | 1421        | 13-Jan-08                    |                              | 141/141                          | 196/204 | 182/186 | 290/306 |                       |          | neg                     |                                        |          |               |                                                            |
|                         |                  | KK                     | fecal       | 1459        | 17-Oct-08                    |                              | 141/141                          | 196/204 | 182/186 | 290/306 |                       |          | neg                     |                                        |          |               |                                                            |
|                         |                  | KK                     | fecal       | 1478        | 25-Oct-08                    |                              | 141/141                          | 196/204 | 182/186 | 290/306 |                       |          | neg                     |                                        |          |               |                                                            |
| Ch-062                  | M                | KK                     | fecal       | 224         | 5-Aug-02                     | 11                           | 141/141                          | 200/231 | 182/186 | 286/286 |                       | pos      | neg                     |                                        |          |               | DOB (18-Oct-00)<br>DLS (13-Jun-04)                         |
| Ch-063                  | M                | MT                     | fecal       | 605         | 23-Jul-04                    |                              | 161/173                          | 200/204 | 182/190 | 294/298 |                       |          | neg                     |                                        |          |               | DOB (28-Mar-98)                                            |
|                         |                  | MT                     | fecal       | 824         | 21-Aug-05                    |                              |                                  |         |         |         |                       |          | neg                     |                                        |          |               |                                                            |
|                         |                  | MT                     | fecal       | 1044        | 30-Jan-06                    |                              |                                  |         |         |         |                       |          | neg                     |                                        |          |               |                                                            |
|                         |                  | MT                     | fecal       | 1045        | 29-Mar-06                    |                              | 161/173                          | 200/204 | 182/190 | 294/298 |                       |          | neg                     |                                        |          |               |                                                            |
|                         |                  | MT                     | fecal       | 1336        | 5-May-08                     |                              | 161/173                          | 200/204 | 182/190 | 294/298 |                       |          | neg                     |                                        |          |               |                                                            |
|                         |                  | MT                     | fecal       | 1466        | 28-Aug-08                    | 2                            | 161/173                          | 200/204 | 182/190 | 294/298 |                       |          | neg                     |                                        |          |               |                                                            |
|                         |                  | MT                     | fecal       | 1437        | 19-Nov-08                    |                              | 161/173                          | 200/204 | 182/190 | 294/298 |                       |          | neg                     |                                        |          |               |                                                            |

| Individual <sup>1</sup> | Sex <sup>2</sup> | Community <sup>3</sup> | Sample type | Sample Code | Collection Date <sup>4</sup> | mtDNA haplotype <sup>5</sup> | Microsatellite Loci <sup>6</sup> |         |         |         | urine WB <sup>7</sup> | fecal WB  | fecal vRNA <sup>8</sup> | GenBank accession numbers <sup>9</sup> |                 |               | Birth and Death Dates with Immigration Notes <sup>10</sup> |
|-------------------------|------------------|------------------------|-------------|-------------|------------------------------|------------------------------|----------------------------------|---------|---------|---------|-----------------------|-----------|-------------------------|----------------------------------------|-----------------|---------------|------------------------------------------------------------|
|                         |                  |                        |             |             |                              |                              | D18s536                          | D4s243  | D10s676 | D9s922  |                       |           |                         | pol                                    | gp41/nef        | SIVcpz Strain |                                                            |
| Ch-064                  | F                | KL                     | fecal       | 39          | 11-Nov-01                    | 13                           | 141/161                          | 200/204 | 182/190 | 298/302 | pos                   | pos       | DQ374657                | DQ374657                               | TAN2            | DOB unknown   |                                                            |
|                         |                  |                        | fecal       | 229         | 17-Mar-02                    | 13                           | 141/161                          | 200/204 | 182/190 | 298/302 | pos                   | neg       |                         |                                        |                 |               |                                                            |
|                         |                  |                        | fecal       | 281         | 24-Dec-02                    | 13                           | 141/161                          | 200/204 | 182/190 | 298/302 | pos                   | neg       |                         |                                        |                 |               |                                                            |
|                         |                  |                        | fecal       | 274         | 20-Jan-03                    | 13                           | 141/161                          | 200/204 | 182/190 | 298/302 | pos                   | neg       |                         |                                        |                 |               |                                                            |
|                         |                  |                        | fecal       | 257         | 24-Jan-03                    | 13                           | 141/161                          | 200/204 | 182/190 | 298/302 | pos                   | neg       |                         |                                        |                 |               |                                                            |
|                         |                  |                        | fecal       | 273         | 24-Jan-03                    | 13                           | 141/161                          | 200/204 | 182/190 | 298/302 | pos                   | neg       |                         |                                        |                 |               |                                                            |
|                         |                  |                        | fecal       | 297         | 29-Jul-03                    | 13                           | 141/161                          | 200/204 | 182/190 | 298/302 | pos                   | neg       |                         |                                        |                 |               |                                                            |
|                         |                  |                        | fecal       | 228         | 28-Aug-03                    | 13                           | 141/161                          | 200/204 | 182/190 | 298/302 | pos                   | neg       |                         |                                        |                 |               |                                                            |
|                         |                  |                        | fecal       | 308         | 26-Sep-03                    | 13                           | 141/161                          | 200/204 | 182/190 | 298/302 | pos                   | neg       |                         |                                        |                 |               |                                                            |
|                         |                  |                        | fecal       | 301         | 9-Oct-03                     | 13                           | 141/161                          | 200/204 | 182/190 | 298/302 | pos                   | pos (pol) |                         |                                        |                 |               |                                                            |
|                         |                  |                        | fecal       | 365         | 30-Jan-04                    | 13                           | 141/161                          | 200/204 | 182/190 | 298/302 | pos                   | neg       |                         |                                        |                 |               |                                                            |
|                         |                  |                        | fecal       | 368         | 10-Feb-04                    | 13                           | 141/161                          | 200/204 | 182/190 | 298/302 | pos                   | neg       |                         |                                        |                 |               |                                                            |
|                         |                  |                        | fecal       | 529         | 28-Jul-04                    | 13                           | 141/161                          | 200/204 | 182/190 | 298/302 | pos                   | pos (pol) |                         |                                        |                 |               |                                                            |
|                         |                  |                        | fecal       | 536         | 4-Aug-04                     | 13                           | 141/161                          | 200/204 | 182/190 | 298/302 | pos                   | neg       |                         |                                        |                 |               |                                                            |
|                         |                  |                        | fecal       | 546         | 13-Aug-04                    | 13                           | 141/161                          | 200/204 | 182/190 | 298/302 | pos                   | pos (pol) |                         |                                        |                 |               |                                                            |
|                         |                  |                        | fecal       | 547B        | 13-Aug-04                    | 13                           | 141/161                          | 200/204 | 182/190 | 298/302 | pos                   | pos (pol) |                         |                                        |                 |               |                                                            |
|                         |                  |                        | fecal       | 568         | 14-Sep-04                    | 13                           | 141/161                          | 200/204 | 182/190 | 298/302 | pos                   | pos (pol) |                         |                                        |                 |               |                                                            |
|                         |                  |                        | fecal       | 569         | 14-Sep-04                    | 13                           | 141/161                          | 200/204 | 182/190 | 298/302 | pos                   | pos (pol) |                         |                                        |                 |               |                                                            |
|                         |                  |                        | fecal       | 570         | 14-Sep-04                    | 13                           | 141/161                          | 200/204 | 182/190 | 298/302 | pos                   | pos (pol) |                         |                                        |                 |               |                                                            |
|                         |                  |                        | fecal       | 579         | 4-Oct-04                     | 13                           | 141/161                          | 200/204 | 182/190 | 298/302 | pos                   | neg       |                         |                                        |                 |               |                                                            |
|                         |                  |                        | fecal       | 580         | 4-Oct-04                     | 13                           | 141/161                          | 200/204 | 182/190 | 298/302 | pos                   | pos (pol) |                         |                                        |                 |               |                                                            |
|                         |                  |                        | fecal       | 601         | 8-Dec-04                     | 13                           | 141/161                          | 200/204 | 182/190 | 298/302 | pos                   | neg       |                         |                                        |                 |               |                                                            |
|                         |                  |                        | fecal       | 918         | 20-Dec-04                    | 13                           | 141/161                          | 200/204 | 182/190 | 298/302 | pos                   |           |                         |                                        |                 |               |                                                            |
|                         |                  |                        | fecal       | 769         | 12-Mar-05                    | 13                           | 141/161                          | 200/204 | 182/190 | 298/302 | pos                   |           |                         |                                        |                 |               |                                                            |
|                         |                  |                        | fecal       | 770         | 12-Mar-05                    | 13                           | 141/161                          | 200/204 | 182/190 | 298/302 | pos                   |           |                         |                                        |                 |               |                                                            |
|                         |                  |                        | fecal       | 771         | 12-Mar-05                    | 13                           | 141/161                          | 200/204 | 182/190 | 298/302 | pos                   |           |                         |                                        |                 |               |                                                            |
|                         |                  |                        | fecal       | 773         | 21-Mar-05                    | 13                           | 141/161                          | 200/204 | 182/190 | 298/302 | pos                   |           |                         |                                        |                 |               |                                                            |
|                         |                  |                        | fecal       | 774         | 23-Mar-05                    | 13                           | 141/161                          | 200/204 | 182/190 | 298/302 | pos                   |           |                         |                                        |                 |               |                                                            |
|                         |                  |                        | fecal       | 775         | 23-Mar-05                    | 13                           | 141/161                          | 200/204 | 182/190 | 298/302 | pos                   |           |                         |                                        |                 |               |                                                            |
|                         |                  |                        | fecal       | 777         | 29-Mar-05                    | 13                           | 141/161                          | 200/204 | 182/190 | 298/302 | pos                   |           |                         |                                        |                 |               |                                                            |
|                         |                  |                        | fecal       | 778         | 29-Mar-05                    | 13                           | 141/161                          | 200/204 | 182/190 | 298/302 | pos                   |           |                         |                                        |                 |               |                                                            |
|                         |                  |                        | fecal       | 870         | 17-Jun-05                    | 13                           | 141/161                          | 200/204 | 182/190 | 298/302 | pos                   |           |                         |                                        |                 |               |                                                            |
|                         |                  |                        | fecal       | 874         | 17-Jun-05                    | 13                           | 141/161                          | 200/204 | 182/190 | 298/302 | pos                   |           |                         |                                        |                 |               |                                                            |
|                         |                  |                        | fecal       | 880         | 24-Jul-05                    | 13                           | 141/161                          | 200/204 | 182/190 | 298/302 | pos                   |           |                         |                                        |                 |               |                                                            |
|                         |                  |                        | fecal       | 888         | 13-Aug-05                    | 13                           | 141/161                          | 200/204 | 182/190 | 298/302 | pos                   |           |                         |                                        |                 |               |                                                            |
|                         |                  |                        | fecal       | 890         | 13-Aug-05                    | 13                           | 141/161                          | 200/204 | 182/190 | 298/302 | pos                   |           |                         |                                        |                 |               |                                                            |
|                         |                  |                        | fecal       | 914         | 3-Nov-05                     | 13                           | 141/161                          | 200/204 | 182/190 | 298/302 | pos                   |           |                         |                                        |                 |               |                                                            |
|                         |                  |                        | fecal       | 935         | 5-Feb-06                     | 13                           | 141/161                          | 200/204 | 182/190 | 298/302 | pos                   |           |                         |                                        |                 |               |                                                            |
|                         |                  |                        | fecal       | 947         | 3-Apr-06                     | 13                           | 141/161                          | 200/204 | 182/190 | 298/302 | pos                   |           |                         |                                        |                 |               |                                                            |
|                         |                  |                        | fecal       | 945         | 13-May-06                    | 13                           | 141/161                          | 200/204 | 182/190 | 298/302 | pos                   |           |                         |                                        |                 |               |                                                            |
|                         |                  |                        | fecal       | 1129        | 6-Jun-06                     | 13                           | 141/161                          | 200/204 | 182/190 | 298/302 | pos                   |           |                         |                                        |                 |               |                                                            |
|                         |                  |                        | fecal       | 1130        | 6-Jun-06                     | 13                           | 141/161                          | 200/204 | 182/190 | 298/302 | pos                   |           |                         |                                        |                 |               |                                                            |
|                         |                  |                        | fecal       | 1134        | 16-Jul-06                    | 13                           | 141/161                          | 200/204 | 182/190 | 298/302 | pos                   |           |                         |                                        |                 |               |                                                            |
|                         |                  |                        | fecal       | 1135        | 22-Jul-06                    | 13                           | 141/161                          | 200/204 | 182/190 | 298/302 | pos                   |           |                         |                                        |                 |               |                                                            |
|                         |                  |                        | fecal       | 1136        | 22-Jul-06                    | 13                           | 141/161                          | 200/204 | 182/190 | 298/302 | pos                   |           |                         |                                        |                 |               |                                                            |
|                         |                  |                        | fecal       | 1148        | 1-Aug-06                     | 13                           | 141/161                          | 200/204 | 182/190 | 298/302 | pos                   |           |                         |                                        |                 |               |                                                            |
|                         |                  |                        | fecal       | 1149        | 1-Aug-06                     | 13                           | 141/161                          | 200/204 | 182/190 | 298/302 | pos                   |           |                         |                                        |                 |               |                                                            |
|                         |                  |                        | fecal       | 1143        | 13-Aug-06                    | 13                           | 141/161                          | 200/204 | 182/190 | 298/302 | pos                   |           |                         |                                        |                 |               |                                                            |
|                         |                  |                        | fecal       | 1146        | 29-Aug-06                    | 13                           | 141/161                          | 200/204 | 182/190 | 298/302 | pos                   |           |                         |                                        |                 |               |                                                            |
|                         |                  |                        | fecal       | 1288        | 9-Jul-07                     | 13                           | 141/161                          | 200/204 | 182/190 | 298/302 | pos                   |           |                         |                                        |                 |               |                                                            |
|                         |                  |                        | fecal       | 1405        | 9-Jul-07                     | 13                           | 141/161                          | 200/204 | 182/190 | 298/302 | pos                   |           |                         |                                        |                 |               |                                                            |
| fecal                   | 1287             | 8-Aug-07               | 13          | 141/161     | 200/204                      | 182/190                      | 298/302                          | pos     |         |         |                       |           |                         |                                        |                 |               |                                                            |
| fecal                   | 1298             | 18-Aug-07              | 13          | 141/161     | 200/204                      | 182/190                      | 298/302                          | pos     |         |         |                       |           |                         |                                        |                 |               |                                                            |
| fecal                   | 1289             | 9-Sep-07               | 13          | 141/161     | 200/204                      | 182/190                      | 298/302                          | pos     |         |         |                       |           |                         |                                        |                 |               |                                                            |
| fecal                   | 1291             | 9-Sep-07               | 13          | 141/161     | 200/204                      | 182/190                      | 298/302                          | pos     |         |         |                       |           |                         |                                        |                 |               |                                                            |
| fecal                   | 1292             | 9-Sep-07               | 13          | 141/161     | 200/204                      | 182/190                      | 298/302                          | pos     |         |         |                       |           |                         |                                        |                 |               |                                                            |
| fecal                   | 1301             | 23-Sep-07              | 13          | 141/161     | 200/204                      | 182/190                      | 298/302                          | pos     |         |         |                       |           |                         |                                        |                 |               |                                                            |
| fecal                   | 1302             | 23-Sep-07              | 13          | 141/161     | 200/204                      | 182/190                      | 298/302                          | pos     |         |         |                       |           |                         |                                        |                 |               |                                                            |
| fecal                   | 1280             | 6-Dec-07               | 13          | 141/161     | 200/204                      | 182/190                      | 298/302                          | pos     |         |         |                       |           |                         |                                        |                 |               |                                                            |
| fecal                   | 1281             | 6-Dec-07               | 13          | 141/161     | 200/204                      | 182/190                      | 298/302                          | pos     |         |         |                       |           |                         |                                        |                 |               |                                                            |
| fecal                   | 1376             | 9-Jun-08               | 13          | 141/161     | 200/204                      | 182/190                      | 298/302                          | pos     |         |         |                       |           |                         |                                        |                 |               |                                                            |
| fecal                   | 1481             | 29-Jul-08              | 13          | 141/161     | 200/204                      | 182/190                      | 298/302                          | pos     |         |         |                       |           |                         |                                        |                 |               |                                                            |
| fecal                   | 1523             | 29-Jul-08              | 13          | 141/161     | 200/204                      | 182/190                      | 298/302                          | pos     |         |         |                       |           |                         |                                        |                 |               |                                                            |
| fecal                   | 1526             | 9-Aug-08               | 13          | 141/161     | 200/204                      | 182/190                      | 298/302                          | pos     |         |         |                       |           |                         |                                        |                 |               |                                                            |
| fecal                   | 1433             | 11-Aug-08              | 13          | 141/161     | 200/204                      | 182/190                      | 298/302                          | pos     |         |         |                       |           |                         |                                        |                 |               |                                                            |
| fecal                   | 1530             | 11-Aug-08              | 13          | 141/161     | 200/204                      | 182/190                      | 298/302                          | pos     |         |         |                       |           |                         |                                        |                 |               |                                                            |
| fecal                   | 1441             | 1-Sep-08               | 13          | 141/161     | 200/204                      | 182/190                      | 298/302                          | pos     |         |         |                       |           |                         |                                        |                 |               |                                                            |
| fecal                   | 1469             | 17-Sep-08              | 13          | 141/161     | 200/204                      | 182/190                      | 298/302                          | pos     |         |         |                       |           |                         |                                        |                 |               |                                                            |
| fecal                   | 1532             | 17-Sep-08              | 13          | 141/161     | 200/204                      | 182/190                      | 298/302                          | pos     |         |         |                       |           |                         |                                        |                 |               |                                                            |
| fecal                   | 283              | na                     | 13          | 141/161     | 200/204                      | 182/190                      | 298/302                          | pos     |         | neg     |                       |           |                         |                                        |                 |               |                                                            |
| Ch-065                  | M                | MT                     | fecal       | 125         | 3-Mar-02                     | 6                            | 141/141                          | 231/235 | 190/190 | 302/306 |                       | neg       |                         |                                        | DOB (23-Jul-97) |               |                                                            |
|                         |                  |                        | fecal       | 136         | 1-May-02                     | 6                            |                                  |         |         |         |                       | neg       |                         |                                        |                 |               |                                                            |
|                         |                  |                        | fecal       | 267         | 20-Jan-03                    | 6                            |                                  |         |         |         |                       | neg       |                         |                                        |                 |               |                                                            |
|                         |                  |                        | urine       | u212        | 27-Jan-03                    | 6                            |                                  |         |         |         |                       | neg       |                         |                                        |                 |               |                                                            |
|                         |                  |                        | fecal       | 488         | 3-May-04                     | 6                            |                                  |         |         |         |                       | neg       |                         |                                        |                 |               |                                                            |
|                         |                  |                        | fecal       | 489         | 3-May-04                     | 6                            | 141/141                          | 231/235 |         |         |                       | neg       |                         |                                        |                 |               |                                                            |
|                         |                  |                        | fecal       | 490         | 21-Jun-04                    | 6                            |                                  |         |         |         |                       | neg       |                         |                                        |                 |               |                                                            |
|                         |                  |                        | fecal       | 491         | 22-Jun-04                    | 6                            |                                  |         |         |         |                       | neg       |                         |                                        |                 |               |                                                            |
|                         |                  |                        | fecal       | 633         | 24-Jul-04                    | 6                            | 141/141                          |         |         |         |                       | neg       |                         |                                        |                 |               |                                                            |
|                         |                  |                        | fecal       | 1062        | 20-Dec-04                    | 6                            |                                  |         |         |         |                       | neg       |                         |                                        |                 |               |                                                            |
|                         |                  |                        | fecal       | 841         | 13-Oct-05                    | 6                            | 141/141                          | 231/235 | 190/190 | 302/306 |                       | neg       |                         |                                        |                 |               |                                                            |
|                         |                  |                        | fecal       | 1063        | 7-Mar-06                     | 6                            | 141/141                          | 231/235 | 190/190 | 302/306 |                       | neg       |                         |                                        |                 |               |                                                            |
|                         |                  |                        | fecal       | 1199        | 5-Apr-07                     | 6                            | 141/141                          | 231/235 | 190/190 | 302/306 |                       | neg       |                         |                                        |                 |               |                                                            |
|                         |                  |                        | fecal       | 1236        | 11-Sep-07                    | 6                            |                                  |         |         |         |                       | neg       |                         |                                        |                 |               |                                                            |
|                         |                  |                        | fecal       | 1235        | 10-Oct-07                    | 6                            |                                  |         |         |         |                       | neg       |                         |                                        |                 |               |                                                            |
|                         |                  |                        | fecal       | 1419        | 22-Feb-08                    | 6                            | 141/141                          | 231/235 | 190/190 | 302/306 |                       | neg       |                         |                                        |                 |               |                                                            |

| Individual <sup>1</sup> | Sex <sup>2</sup> | Comm-<br>unity <sup>3</sup> | Sample<br>type | Sample<br>Code | Collection<br>Date <sup>4</sup> | mtDNA<br>haplotype <sup>5</sup> | Microsatellite Loci <sup>6</sup> |         |         |         | urine<br>WB <sup>7</sup> | fecal<br>WB | fecal vRNA <sup>8</sup> | GenBank accession<br>numbers <sup>9</sup> |          | SIVcpz<br>Strain | Birth and Death Dates<br>with Immigration Notes <sup>10</sup> |
|-------------------------|------------------|-----------------------------|----------------|----------------|---------------------------------|---------------------------------|----------------------------------|---------|---------|---------|--------------------------|-------------|-------------------------|-------------------------------------------|----------|------------------|---------------------------------------------------------------|
|                         |                  |                             |                |                |                                 |                                 | D18s536                          | D4s243  | D10s676 | D9s922  |                          |             |                         | pol                                       | gp41/nef |                  |                                                               |
|                         |                  |                             |                |                |                                 |                                 |                                  |         |         |         |                          |             |                         |                                           |          |                  |                                                               |
| Ch-065<br>(Con't)       |                  | MT                          | fecal          | 1384           | 8-May-08                        |                                 | 141/141                          | 231/235 | 190/190 | 302/306 | neg                      |             |                         |                                           |          |                  |                                                               |
|                         |                  | MT                          | fecal          | 1504           | 13-Nov-08                       |                                 | 141/141                          | 231/235 | 190/190 | 302/306 | neg                      |             |                         |                                           |          |                  |                                                               |
| Ch-066                  | F                | MT                          | fecal          | 135            | 8-May-02                        | 1                               | 161/177                          | 200/235 | 182/190 | 306/306 | neg                      | neg         |                         |                                           |          |                  | DOB (2-Jul-84)*<br>First arrived in MT (20-Jul-94)            |
|                         |                  | MT                          | urine          | u254           | 16-May-02                       |                                 |                                  |         |         |         | neg                      |             |                         |                                           |          |                  |                                                               |
|                         |                  | MT                          | fecal          | 264            | 10-Jan-03                       | 1                               |                                  |         |         |         | neg                      | neg         |                         |                                           |          |                  |                                                               |
|                         |                  | MT                          | urine          | u605           | 16-Jan-03                       |                                 |                                  |         |         |         | neg                      |             |                         |                                           |          |                  |                                                               |
|                         |                  | MT                          | urine          | u553           | 21-Jan-03                       |                                 |                                  |         |         |         | neg                      |             |                         |                                           |          |                  |                                                               |
|                         |                  | MT                          | urine          | u571           | 29-Jan-03                       |                                 |                                  |         |         |         | neg                      |             |                         |                                           |          |                  |                                                               |
|                         |                  | MT                          | fecal          | 355            | 23-Aug-03                       | 1                               | 161/177                          |         | 182/190 |         |                          | neg         |                         |                                           |          |                  |                                                               |
|                         |                  | MT                          | fecal          | 500            | 27-Apr-04                       | 1                               | 161/177                          |         |         |         |                          | neg         |                         |                                           |          |                  |                                                               |
|                         |                  | MT                          | fecal          | 501            | 14-Jun-04                       |                                 |                                  |         |         |         |                          | neg         |                         |                                           |          |                  |                                                               |
|                         |                  | MT                          | fecal          | 657            | 27-Jul-04                       | 1                               | 161/177                          | 200/235 | 182/190 |         |                          | neg         |                         |                                           |          |                  |                                                               |
|                         |                  | MT                          | fecal          | 1069           | 30-Dec-04                       |                                 |                                  |         |         |         |                          | neg         |                         |                                           |          |                  |                                                               |
|                         |                  | MT                          | fecal          | 833            | 25-Aug-05                       | 1                               | 161/177                          | 200/235 | 182/190 | 306/306 |                          | neg         |                         |                                           |          |                  |                                                               |
|                         |                  | MT                          | fecal          | 832            | 28-Aug-05                       | 1                               | 161/177                          | 200/235 | 182/190 | 306/306 |                          | neg         |                         |                                           |          |                  |                                                               |
|                         |                  | MT                          | fecal          | 1067           | 10-Dec-05                       |                                 |                                  |         |         |         |                          | neg         |                         |                                           |          |                  |                                                               |
|                         |                  | MT                          | fecal          | 1068           | 8-Feb-06                        |                                 |                                  |         |         |         |                          | neg         |                         |                                           |          |                  |                                                               |
|                         |                  | MT                          | fecal          | 1070           | 30-May-06                       |                                 |                                  |         |         |         |                          | neg         |                         |                                           |          |                  |                                                               |
|                         |                  | MT                          | fecal          | 1108           | 9-Jun-06                        |                                 |                                  |         |         |         |                          | neg         |                         |                                           |          |                  |                                                               |
|                         |                  | MT                          | fecal          | 1193           | 31-Mar-07                       | 1                               | 161/177                          | 200/235 | 182/190 | 306/306 |                          | neg         |                         |                                           |          |                  |                                                               |
|                         |                  | MT                          | fecal          | 1282           | 7-May-07                        |                                 | 161/177                          | 200/235 | 182/190 | 306/306 |                          | neg         |                         |                                           |          |                  |                                                               |
|                         |                  | MT                          | fecal          | 1423           | 5-Aug-07                        |                                 | 161/177                          | 200/235 | 182/190 | 306/306 |                          | neg         |                         |                                           |          |                  |                                                               |
|                         |                  | MT                          | fecal          | 1251           | 25-Jan-08                       |                                 |                                  |         |         |         |                          | neg         |                         |                                           |          |                  |                                                               |
|                         |                  | MT                          | fecal          | 1402           | 22-Feb-08                       |                                 | 161/177                          | 200/235 | 182/190 | 306/306 |                          | neg         |                         |                                           |          |                  |                                                               |
|                         |                  | MT                          | fecal          | 1344           | 10-Jul-08                       | 1                               | 161/177                          | 200/235 | 182/190 | 306/306 |                          | neg         |                         |                                           |          |                  |                                                               |
|                         |                  | MT                          | fecal          | 1510           | 18-Aug-08                       |                                 | 161/177                          | 200/235 | 182/190 | 306/306 |                          | neg         |                         |                                           |          |                  |                                                               |
|                         |                  | MT                          | fecal          | 1511           | 21-Oct-08                       |                                 | 161/177                          | 200/235 | 182/190 | 306/306 |                          | neg         |                         |                                           |          |                  |                                                               |
|                         |                  | MT                          | fecal          | 1454           | 5-Nov-08                        |                                 | 161/177                          | 200/235 | 182/190 | 306/306 |                          | neg         |                         |                                           |          |                  |                                                               |
|                         |                  | MT                          | fecal          | 1449           | 3-Dec-08                        |                                 | 161/177                          | 200/235 | 182/190 | 306/306 |                          | neg         |                         |                                           |          |                  |                                                               |
| Ch-067                  | M                | MT                          | fecal          | 211            | 5-Aug-02                        | 1                               | 141/161                          | 196/200 | 182/190 | 302/302 | neg                      | neg         |                         |                                           |          |                  | DOB (30-Dec-00)                                               |
|                         |                  | MT                          | fecal          | 762            | 1-Mar-05                        | 1                               | 141/161                          | 196/200 | 182/190 | 302/302 | neg                      |             |                         |                                           |          |                  |                                                               |
|                         |                  | MT                          | fecal          | 1066           | 24-Jan-06                       | 1                               | 141/161                          | 196/200 | 182/190 | 302/302 | neg                      |             |                         |                                           |          |                  |                                                               |
|                         |                  | MT                          | fecal          | 1071           | 20-Mar-06                       |                                 | 141/161                          | 196/200 | 182/190 | 302/302 | neg                      |             |                         |                                           |          |                  |                                                               |
|                         |                  | MT                          | fecal          | 1383           | 6-Mar-08                        |                                 | 141/161                          | 196/200 | 182/190 | 302/302 | neg                      |             |                         |                                           |          |                  |                                                               |
| Ch-068                  | M                | MT                          | fecal          | 214            | 10-Aug-02                       | 6                               | 141/161                          | 200/235 | 182/194 | 268/306 | neg                      | neg         |                         |                                           |          |                  | DOB (2-Nov-01)                                                |
|                         |                  | MT                          | fecal          | 487            | 23-Jun-04                       | 6                               | 141/161                          | 200/235 | 182/194 | 268/306 | neg                      |             |                         |                                           |          |                  |                                                               |
|                         |                  | MT                          | fecal          | 625            | 17-Jul-04                       | 6                               | 141/161                          | 200/235 | 182/194 | 268/306 | neg                      |             |                         |                                           |          |                  |                                                               |
|                         |                  | MT                          | fecal          | 759            | 17-Jan-05                       | 6                               | 141/161                          | 200/235 | 182/194 | 268/306 | neg                      |             |                         |                                           |          |                  |                                                               |
|                         |                  | MT                          | fecal          | 1061           | 6-Mar-06                        |                                 | 141/161                          | 200/235 | 182/194 | 268/306 | neg                      |             |                         |                                           |          |                  |                                                               |
|                         |                  | MT                          | fecal          | 1224           | 20-Apr-07                       |                                 | 141/161                          | 200/235 | 182/194 | 268/306 | neg                      |             |                         |                                           |          |                  |                                                               |
|                         |                  | MT                          | fecal          | 1223           | 9-Oct-07                        |                                 | 141/161                          | 200/235 | 182/194 | 268/306 | neg                      |             |                         |                                           |          |                  |                                                               |
|                         |                  | MT                          | fecal          | 1225           | 23-Jan-08                       |                                 | 141/161                          | 200/235 | 182/194 | 268/306 | neg                      |             |                         |                                           |          |                  |                                                               |
|                         |                  | MT                          | fecal          | 1397           | 21-Feb-08                       |                                 | 141/161                          | 200/235 | 182/194 | 268/306 | neg                      |             |                         |                                           |          |                  |                                                               |
|                         |                  | MT                          | fecal          | 1380           | 21-Jun-08                       |                                 | 141/161                          | 200/235 | 182/194 | 268/306 | pos                      |             |                         |                                           |          |                  |                                                               |
|                         |                  | MT                          | fecal          | 1499           | 11-Aug-08                       |                                 | 141/161                          | 200/235 | 182/194 | 268/306 | neg                      |             |                         |                                           |          |                  |                                                               |
|                         |                  | MT                          | fecal          | 1485           | 23-Oct-08                       |                                 | 141/161                          | 200/235 | 182/194 | 268/306 | neg                      |             |                         |                                           |          |                  |                                                               |
|                         |                  | MT                          | fecal          | 1473           | 13-Nov-08                       |                                 | 141/161                          | 200/235 | 182/194 | 268/306 | neg                      |             |                         |                                           |          |                  |                                                               |
| Ch-069                  | M                | MT                          | fecal          | 223            | 24-Aug-02                       | 11                              | 141/173                          | 196/235 | 186/190 | 268/298 | neg                      | neg         |                         |                                           |          |                  | DOB (9-Nov-96)                                                |
|                         |                  | MT                          | fecal          | 486            | 5-May-04                        | 11                              | 141/173                          | 196/235 | 186/190 | 268/298 | neg                      |             |                         |                                           |          |                  | DOD (17-Jan-05)                                               |
|                         |                  | MT                          | fecal          | 1057           | 29-Dec-04                       |                                 | 141/173                          | 196/235 | 186/190 | 268/298 | neg                      |             |                         |                                           |          |                  |                                                               |
| Ch-070                  | F                | KL                          | fecal          | 239            | 13-Mar-02                       | 2                               | 141/141                          | 200/204 | 182/190 | 268/302 | pos                      | pos         | AY181989                | TAN4                                      |          |                  | DOB unknown                                                   |
| Ch-071                  | F                | KL                          | fecal          | 242            | 22-Jun-02                       | 10                              | 141/173                          | 196/196 | 190/190 | 290/302 | pos                      | pos         |                         | AY181993                                  | TAN5     |                  | DOB (2-Jul-92)*<br>First arrived in KK (15-Feb-05)            |
|                         |                  | KL                          | fecal          | 298            | 17-Aug-03                       | 10                              | 141/173                          | 196/196 | 190/190 | 290/302 | pos                      |             |                         |                                           |          |                  |                                                               |
|                         |                  | KL                          | fecal          | 367            | 1-Jun-04                        | 10                              | 141/173                          | 196/196 | 190/190 | 290/302 | pos                      | neg         |                         |                                           |          |                  |                                                               |
|                         |                  | KL                          | fecal          | 597            | 28-Nov-04                       | 10                              | 141/173                          | 196/196 | 190/190 | 290/302 | pos                      | neg         |                         |                                           |          |                  |                                                               |
|                         |                  | KK                          | fecal          | 734            | 1-Mar-05                        | 10                              | 141/173                          | 196/196 | 190/190 | 290/302 | pos                      | pos         | FJ895394                |                                           | TAN5     |                  |                                                               |
|                         |                  | KK                          | fecal          | 989            | 22-Jan-06                       | 10                              | 141/173                          | 196/196 | 190/190 | 290/302 | pos                      | pos         |                         | FJ895382                                  | TAN5     |                  |                                                               |
|                         |                  | KK                          | fecal          | 1167           | 12-Feb-07                       |                                 | 141/173                          | 196/196 | 190/190 | 290/302 | pos                      |             |                         |                                           |          |                  |                                                               |
|                         |                  | KK                          | fecal          | 1323           | 7-Apr-07                        |                                 | 141/173                          | 196/196 | 190/190 | 290/302 | pos                      |             |                         |                                           |          |                  |                                                               |
|                         |                  | KK                          | fecal          | 1399           | 9-May-08                        |                                 | 141/173                          | 196/196 | 190/190 | 290/302 | pos                      |             |                         |                                           |          |                  |                                                               |
|                         |                  | KK                          | fecal          | 1508           | 15-Oct-08                       |                                 | 141/173                          | 196/196 | 190/190 | 290/302 | pos                      |             |                         |                                           |          |                  |                                                               |
| Ch-072                  | M                | KK                          | fecal          | 1014           | 25-Mar-06                       | 5                               | 153/157                          | 200/235 | 182/190 | 298/302 | neg                      |             |                         |                                           |          |                  | DOB (25-Aug-04)<br>DOD (18-Nov-06)<br>DOB (17-Jun-01)         |
| Ch-073                  | F                | KK                          | fecal          | 673            | 31-Jul-04                       | 5                               | 141/173                          | 204/231 | 186/194 | 302/302 | neg                      |             |                         |                                           |          |                  |                                                               |
|                         |                  | KK                          | fecal          | 807            | 10-Jun-05                       | 5                               | 141/173                          | 204/231 | 186/194 | 302/302 | neg                      |             |                         |                                           |          |                  |                                                               |
|                         |                  | KK                          | fecal          | 1013           | 17-Jan-06                       |                                 | 141/173                          | 204/231 | 186/194 | 302/302 | neg                      |             |                         |                                           |          |                  |                                                               |
|                         |                  | KK                          | fecal          | 1011           | 26-Jan-06                       |                                 |                                  |         |         |         | neg                      |             |                         |                                           |          |                  |                                                               |
|                         |                  | KK                          | fecal          | 1155           | 6-Feb-07                        |                                 | 141/173                          | 204/231 | 186/194 | 302/302 | neg                      |             |                         |                                           |          |                  |                                                               |
|                         |                  | KK                          | fecal          | 1307           | 25-Jan-08                       |                                 |                                  |         |         |         | neg                      |             |                         |                                           |          |                  |                                                               |
|                         |                  | KK                          | fecal          | 1438           | 17-Oct-08                       |                                 | 141/173                          | 204/231 | 186/194 | 302/302 | neg                      |             |                         |                                           |          |                  |                                                               |
| Ch-075                  | M                | MT                          | fecal          | 761            | 17-Apr-05                       | 1                               | 141/161                          | 200/235 | 182/182 | 302/306 | neg                      |             |                         |                                           |          |                  | DOB (30-Apr-01)                                               |
|                         |                  | MT                          | fecal          | 1247           | 2-Aug-07                        |                                 | 141/161                          | 200/235 | 182/182 | 302/306 | neg                      |             |                         |                                           |          |                  |                                                               |
|                         |                  | MT                          | fecal          | 1249           | 25-Jan-08                       |                                 | 141/161                          | 200/235 | 182/182 | 302/306 | neg                      |             |                         |                                           |          |                  |                                                               |
|                         |                  | MT                          | fecal          | 1411           | 26-Feb-08                       |                                 | 141/161                          | 200/235 | 182/182 | 302/306 | neg                      |             |                         |                                           |          |                  |                                                               |
| Ch-076                  | F                | MT                          | fecal          | 1074           | 31-Jan-06                       | 10                              |                                  | 200/204 | 182/182 |         | neg                      |             |                         |                                           |          |                  | DOB (2-Jul-86)*<br>First arrived in MT (28-May-01)            |
|                         |                  | MT                          | fecal          | 1261           | 1-Jun-07                        |                                 | 141/153                          | 200/204 | 182/182 | 268/302 | neg                      |             |                         |                                           |          |                  |                                                               |
|                         |                  | MT                          | fecal          | 1262           | 1-Oct-07                        |                                 |                                  |         |         |         | neg                      |             |                         |                                           |          |                  |                                                               |
|                         |                  | MT                          | fecal          | 1264           | 25-Jan-08                       |                                 | 141/153                          | 200/204 | 182/182 | 268/302 | neg                      |             |                         |                                           |          |                  |                                                               |
|                         |                  | MT                          | fecal          | 278            | na                              | 10                              | 141/153                          | 200/204 | 182/182 |         | neg                      |             |                         |                                           |          |                  |                                                               |
| Ch-077                  | M                | KK                          | fecal          | 797            | 6-Jun-05                        | 1                               | 141/161                          | 204/204 | 182/186 | 286/294 | neg                      |             |                         |                                           |          |                  | DOB (15-Jan-04)                                               |
|                         |                  | KK                          | fecal          | 1104           | 1-Jul-06                        | 1                               | 141/161                          | 204/204 | 182/186 | 286/294 | neg                      |             |                         |                                           |          |                  |                                                               |
|                         |                  | KK                          | fecal          | 1366           | 19-Aug-06                       | 1                               | 141/161                          | 204/204 | 182/186 | 286/294 | neg                      |             |                         |                                           |          |                  |                                                               |
|                         |                  | KK                          | fecal          | 1241           | 25-Jun-07                       |                                 | 141/161                          | 204/204 | 182/186 | 286/294 | neg                      |             | </                      |                                           |          |                  |                                                               |

| Individual <sup>1</sup> | Sex <sup>2</sup> | Community <sup>3</sup> | Sample type | Sample Code | Collection Date <sup>4</sup> | mtDNA haplotype <sup>5</sup> | Microsatellite Loci <sup>6</sup> |         |         |         | urine WB <sup>7</sup> | fecal WB | fecal vRNA <sup>8</sup> | GenBank accession numbers <sup>9</sup> |          |               | Birth and Death Dates with Immigration Notes <sup>10</sup> |         |         |
|-------------------------|------------------|------------------------|-------------|-------------|------------------------------|------------------------------|----------------------------------|---------|---------|---------|-----------------------|----------|-------------------------|----------------------------------------|----------|---------------|------------------------------------------------------------|---------|---------|
|                         |                  |                        |             |             |                              |                              | D18s536                          | D4s243  | D10s676 | D9s922  |                       |          |                         | pol                                    | gp41/nef | SIVcpz Strain |                                                            |         |         |
| Ch-078<br>(Con't)       |                  | KK                     | fecal       | 193         | 29-Apr-02                    | 12                           | 141/153                          | 204/204 | 186/186 | 286/298 | neg                   | neg      |                         |                                        |          |               |                                                            |         |         |
|                         |                  |                        |             | 204         | 15-May-02                    | 12                           | 141/153                          | 204/204 | 186/186 | 286/298 |                       |          |                         |                                        |          |               |                                                            |         |         |
|                         |                  |                        |             | 139         | 3-Jun-02                     | 12                           | 141/153                          | 204/204 | 186/186 | 286/298 |                       |          |                         |                                        |          |               |                                                            |         |         |
|                         |                  |                        |             | 209         | 19-Jun-02                    | 12                           | 141/153                          | 204/204 | 186/186 | 286/298 |                       |          |                         |                                        |          |               |                                                            |         |         |
|                         |                  |                        |             | 182         | 2-Aug-02                     | 12                           | 141/153                          | 204/204 | 186/186 | 286/298 |                       |          |                         |                                        |          |               |                                                            |         |         |
|                         |                  |                        |             | 262         | 20-Nov-02                    | 12                           | 141/153                          | 204/204 | 186/186 | 286/298 |                       |          |                         |                                        |          |               |                                                            |         |         |
|                         |                  |                        |             | 259         | 6-Jan-03                     | 12                           | 141/153                          | 204/204 | 186/186 | 286/298 |                       |          |                         |                                        |          |               |                                                            |         |         |
|                         |                  |                        |             | 288         | 26-Aug-03                    | 12                           | 141/153                          | 204/204 | 186/186 | 286/298 |                       |          |                         |                                        |          |               |                                                            |         |         |
|                         |                  |                        |             | 370         | 10-Jun-04                    | 12                           | 141/153                          | 204/204 | 186/186 | 286/298 |                       |          |                         |                                        |          |               |                                                            |         |         |
|                         |                  |                        |             | 371         | 30-Jun-04                    | 12                           | 141/153                          | 204/204 | 186/186 | 286/298 |                       |          |                         |                                        |          |               |                                                            |         |         |
|                         |                  |                        |             | 563         | 30-Aug-04                    | 12                           | 141/153                          | 204/204 | 186/186 | 286/298 |                       |          |                         |                                        |          |               |                                                            |         |         |
|                         |                  |                        |             | 608         | 25-Sep-04                    | 12                           | 141/153                          | 204/204 | 186/186 | 286/298 |                       |          |                         |                                        |          |               |                                                            |         |         |
|                         |                  |                        |             | 609         | 20-Nov-04                    | 12                           | 141/153                          | 204/204 | 186/186 | 286/298 |                       |          |                         |                                        |          |               |                                                            |         |         |
|                         |                  |                        |             | 953         | 23-Dec-04                    |                              |                                  |         |         |         |                       |          |                         |                                        |          |               |                                                            |         |         |
|                         |                  |                        |             | 712         | 15-Feb-05                    | 12                           | 141/153                          | 204/204 | 186/186 | 286/298 |                       |          |                         |                                        |          |               |                                                            |         |         |
|                         |                  |                        |             | 781         | 18-Aug-05                    |                              |                                  |         |         |         |                       |          |                         |                                        |          |               |                                                            |         |         |
|                         |                  |                        |             | 849         | 13-Oct-05                    |                              |                                  |         |         |         |                       |          |                         |                                        |          |               |                                                            |         |         |
| 952                     | 17-Feb-06        |                        |             | 141/153     | 204/204                      | 186/186                      | 286/298                          |         |         |         |                       |          |                         |                                        |          |               |                                                            |         |         |
| 994                     | 18-Feb-06        |                        |             | 141/153     | 204/204                      | 186/186                      | 286/298                          |         |         |         |                       |          |                         |                                        |          |               |                                                            |         |         |
| 1428                    | 26-Jun-07        |                        |             | 141/153     | 204/204                      | 186/186                      | 286/298                          |         |         |         |                       |          |                         |                                        |          |               |                                                            |         |         |
| 1373                    | 29-Jul-07        |                        |             | 141/153     | 204/204                      | 186/186                      | 286/298                          |         |         |         |                       |          |                         |                                        |          |               |                                                            |         |         |
| 1389                    | 22-Jun-08        |                        |             | 141/153     | 204/204                      | 186/186                      | 286/298                          |         |         |         |                       |          |                         |                                        |          |               |                                                            |         |         |
| Ch-079                  | F                | KK                     | fecal       | 256         | 7-Nov-02                     | 13                           | 141/141                          | 204/235 | 190/190 | 290/302 | neg                   | neg      |                         |                                        |          |               | DOB (2-Jul-90)*<br>First arrived in KK (2-Jul-02)          |         |         |
|                         |                  |                        |             | KK          | urine                        | u344                         | 23-Apr-03                        |         |         |         |                       |          |                         |                                        |          |               |                                                            |         | neg     |
|                         |                  |                        |             | KK          | urine                        | u340                         | 18-May-03                        |         |         |         |                       |          |                         |                                        |          |               |                                                            |         | neg     |
|                         |                  |                        |             | KK          | fecal                        | 313                          | 7-Sep-03                         | 13      | 141/141 | 204/235 |                       |          |                         |                                        |          |               |                                                            | 190/190 | 290/302 |
|                         |                  |                        |             | KK          | urine                        | u498                         | 7-Sep-03                         |         |         |         |                       |          |                         |                                        |          |               |                                                            |         | neg     |
|                         |                  |                        |             | KK          | fecal                        | 437                          | 5-Jun-04                         |         |         |         |                       |          |                         |                                        |          |               |                                                            |         | neg     |
|                         |                  |                        |             | KK          | fecal                        | 438                          | 15-Jun-04                        |         |         |         |                       |          |                         |                                        |          |               |                                                            |         | neg     |
|                         |                  |                        |             | KK          | fecal                        | 664                          | 12-Dec-04                        | 13      | 141/141 | 204/235 |                       |          |                         |                                        |          |               |                                                            | 190/190 | 290/302 |
|                         |                  |                        |             | KK          | fecal                        | 803                          | 15-Jul-05                        | 13      | 141/141 | 204/235 |                       |          |                         |                                        |          |               |                                                            | 190/190 | 290/302 |
|                         |                  |                        |             | KK          | fecal                        | 1002                         | 20-Nov-05                        |         |         |         |                       |          |                         |                                        |          |               |                                                            |         | neg     |
|                         |                  |                        |             | KK          | fecal                        | 1003                         | 29-Jan-06                        |         |         |         |                       |          |                         |                                        |          |               |                                                            |         | neg     |
|                         |                  |                        |             | KK          | fecal                        | 1004                         | 13-Mar-06                        |         |         |         |                       |          |                         |                                        |          |               |                                                            |         | neg     |
|                         |                  |                        |             | KK          | fecal                        | 1114                         | 8-Jun-06                         |         |         |         |                       |          |                         |                                        |          |               |                                                            |         | neg     |
|                         |                  |                        |             | KK          | fecal                        | 1115                         | 13-Jul-06                        |         |         |         |                       |          |                         |                                        |          |               |                                                            |         | neg     |
|                         |                  |                        |             | KK          | fecal                        | 1160                         | 9-Feb-07                         | 13      | 141/141 | 204/235 |                       |          |                         |                                        |          |               |                                                            | 190/190 | 290/302 |
|                         |                  |                        |             | KK          | fecal                        | 1272                         | 9-Jan-08                         |         |         |         |                       |          |                         |                                        |          |               |                                                            |         | neg     |
|                         |                  |                        |             | KK          | fecal                        | 1350                         | 15-Jul-08                        |         |         |         |                       |          |                         |                                        |          |               |                                                            |         | neg     |
| KK                      | fecal            | 1476                   | 21-Oct-08   | 13          | 141/141                      | 204/235                      | 190/190                          | 290/302 |         |         |                       |          |                         |                                        |          |               |                                                            |         |         |
| KK                      | fecal            | 1513                   | ?/?/2008    |             |                              |                              |                                  | neg     |         |         |                       |          |                         |                                        |          |               |                                                            |         |         |
| Ch-080                  | F                | MT                     | fecal       | 510         | 5-May-04                     | 9                            | 141/157                          | 204/204 | 182/186 | 298/298 | pos                   | neg      |                         |                                        |          |               | DOB (2-Jul-88)*<br>First arrived in KK (15-Feb-05)         |         |         |
|                         |                  |                        |             | 511         | 7-May-04                     | 9                            | 141/157                          | 204/204 | 182/186 | 298/298 |                       |          |                         |                                        |          |               |                                                            |         |         |
|                         |                  |                        |             | 512         | 16-May-04                    | 9                            | 141/157                          | 204/204 | 182/186 | 298/298 |                       |          |                         |                                        |          |               |                                                            |         |         |
|                         |                  |                        |             | 519         | 17-Jun-04                    | 9                            | 141/157                          | 204/204 | 182/186 | 298/298 |                       |          |                         |                                        |          |               |                                                            |         |         |
|                         |                  |                        |             | 697         | 4-Jul-04                     | 9                            | 141/157                          | 204/204 | 182/186 | 298/298 |                       |          |                         |                                        |          |               |                                                            |         |         |
|                         |                  |                        |             | 698         | 15-Jul-04                    | 9                            | 141/157                          | 204/204 | 182/186 | 298/298 |                       |          |                         |                                        |          |               |                                                            |         |         |
|                         |                  |                        |             | 699         | 20-Jul-04                    | 9                            | 141/157                          | 204/204 | 182/186 | 298/298 |                       |          |                         |                                        |          |               |                                                            |         |         |
|                         |                  |                        |             | 700         | 21-Jul-04                    | 9                            | 141/157                          | 204/204 | 182/186 | 298/298 |                       |          |                         |                                        |          |               |                                                            |         |         |
|                         |                  |                        |             | 735         | 1-Mar-05                     | 9                            | 141/157                          | 204/204 | 182/186 | 298/298 |                       |          |                         |                                        |          |               |                                                            |         |         |
|                         |                  |                        |             | 818         | 18-Aug-05                    |                              |                                  |         |         |         |                       |          |                         |                                        |          |               |                                                            |         |         |
|                         |                  |                        |             | 798         | 27-Aug-05                    | 9                            | 141/157                          | 204/204 | 182/186 | 298/298 |                       |          |                         |                                        |          |               |                                                            |         |         |
|                         |                  |                        |             | 865         | 24-Oct-05                    | 9                            | 141/157                          | 204/204 | 182/186 | 298/298 |                       |          |                         |                                        |          |               |                                                            |         |         |
|                         |                  |                        |             | 1124        | 2-Oct-06                     | 9                            | 141/157                          | 204/204 | 182/186 | 298/298 |                       |          |                         |                                        |          |               |                                                            |         |         |
|                         |                  |                        |             | 1489        | 9-Oct-08                     |                              |                                  |         |         |         |                       |          |                         |                                        |          |               |                                                            |         |         |
| Ch-082                  | F                | KL                     | fecal       | 244         | 7-Aug-02                     | 1                            | 141/141                          | 204/204 | 186/190 | 302/306 | pos                   | neg      | FJ895402                | TAN19                                  |          |               | DOB unknown                                                |         |         |
|                         |                  |                        |             | 234         | 22-Aug-02                    | 1                            | 141/141                          | 204/204 | 186/190 | 302/306 |                       |          |                         |                                        |          |               |                                                            |         |         |
| Ch-089                  | F                | KL                     | fecal       | 237         | 15-Aug-02                    | 3                            | 141/177                          | 204/235 | 182/182 | 294/298 | neg                   | neg      | FJ895396                | TAN18                                  |          |               | DOB unknown                                                |         |         |
|                         |                  |                        |             | 170         | 23-Aug-02                    | 3                            | 141/177                          | 204/235 | 182/182 | 294/298 |                       |          |                         |                                        |          |               |                                                            |         |         |
|                         |                  |                        |             | 240         | 23-Aug-02                    | 3                            | 141/177                          | 204/235 | 182/182 | 294/298 |                       |          |                         |                                        |          |               |                                                            |         |         |
|                         |                  |                        |             | 882         | 25-Jul-05                    | 3                            | 141/177                          | 204/235 |         |         |                       |          |                         |                                        |          |               |                                                            |         |         |
|                         |                  |                        |             | 944         | 26-Apr-06                    | 3                            | 141/177                          | 204/235 | 182/182 | 294/298 |                       |          |                         |                                        |          |               |                                                            |         |         |
|                         |                  |                        |             | 1303        | 25-Apr-07                    | 3                            | 141/177                          | 204/235 | 182/182 | 294/298 |                       |          |                         |                                        |          |               |                                                            |         |         |
| 1277                    | 6-Aug-07         |                        |             |             |                              |                              |                                  |         |         |         |                       |          |                         |                                        |          |               |                                                            |         |         |
| Ch-090                  | M                | KK                     | fecal       | 1170        | 16-Feb-07                    | 12                           | 141/141                          | 204/231 | 186/190 | 290/298 | neg                   | neg      |                         |                                        |          |               | DOB (20-Nov-05)                                            |         |         |
|                         |                  |                        |             | 1457        | 4-Dec-08                     |                              |                                  |         |         |         |                       |          |                         |                                        |          |               |                                                            |         |         |
| Ch-094                  | F                | MT                     | fecal       | 1333        | 25-May-08                    | 12                           | 157/173                          | 231/235 | 186/190 | 302/302 | neg                   | neg      |                         |                                        |          |               | DOB (31-Mar-06)                                            |         |         |
|                         |                  |                        |             | 1474        | 24-Nov-08                    |                              |                                  |         |         |         |                       |          |                         |                                        |          |               |                                                            |         |         |
| Ch-096                  | F                | MT                     | fecal       | 353         | 1-Oct-03                     |                              | 153/161                          | 200/200 | 182/182 | 268/298 | neg                   | neg      |                         |                                        |          |               | DOB (2-Jul-97)*                                            |         |         |
|                         |                  |                        |             | 509         | 11-Jun-04                    | 10                           |                                  |         |         |         |                       |          |                         |                                        |          |               |                                                            |         |         |
|                         |                  |                        |             | 672         | 17-Jul-04                    | 10                           | 153/161                          |         |         |         |                       |          |                         |                                        |          |               |                                                            |         |         |
|                         |                  |                        |             | 1082        | 24-Nov-05                    | 10                           | 153/161                          | 200/200 | 182/182 | 268/298 |                       |          |                         |                                        |          |               |                                                            |         |         |
|                         |                  |                        |             | 1276        | 9-Sep-07                     |                              |                                  |         |         |         |                       |          |                         |                                        |          |               |                                                            |         |         |
|                         |                  |                        |             | 1407        | 14-Jul-08                    |                              |                                  |         |         |         |                       |          |                         |                                        |          |               |                                                            |         |         |
|                         |                  |                        |             | 1482        | 18-Oct-08                    |                              |                                  |         |         |         |                       |          |                         |                                        |          |               |                                                            |         |         |
| 1461                    | 22-Nov-08        |                        |             |             |                              |                              |                                  |         |         |         |                       |          |                         |                                        |          |               |                                                            |         |         |
| Ch-097                  | F                | KK                     | fecal       | 1188        | 23-Mar-07                    | 7                            | 141/161                          | 204/235 | 182/182 | 302/302 | neg                   | neg      |                         |                                        |          |               | DOB (14-Dec-05)                                            |         |         |
|                         |                  |                        |             | 1196        | 4-Apr-07                     | 7                            | 141/161                          | 204/235 | 182/182 | 302/302 |                       |          |                         |                                        |          |               |                                                            |         |         |
|                         |                  |                        |             | 1415        | 13-Mar-08                    |                              |                                  |         |         |         |                       |          |                         |                                        |          |               |                                                            |         |         |
|                         |                  |                        |             | 1347        | 7-Apr-08                     |                              |                                  |         |         |         |                       |          |                         |                                        |          |               |                                                            |         |         |
|                         |                  |                        |             | 1468        | 21-Nov-08                    |                              |                                  |         |         |         |                       |          |                         |                                        |          |               |                                                            |         |         |
| Ch-098                  | F                | KL                     | fecal       | 249         | 14-Jun-02                    | 8                            | 141/157                          | 235/235 | 182/190 | 298/302 | neg                   | neg      |                         |                                        |          |               | DOB (2-Jul-91)*<br>First arrived in MT (8-Jun-04)          |         |         |
|                         |                  |                        |             | 250         | 14-Jun-02                    | 8                            | 141/157                          | 235/235 | 182/190 | 298/302 |                       |          |                         |                                        |          |               |                                                            |         |         |
|                         |                  |                        |             | 235         | 26-Jun-02                    | 8                            | 141/157                          | 235/235 | 182/190 | 298/302 |                       |          |                         |                                        |          |               |                                                            |         |         |
|                         |                  |                        |             | 318         | 29-Mar-03                    | 8                            | 141/157                          | 235/235 | 182/190 | 298/302 |                       |          |                         |                                        |          |               |                                                            |         |         |
|                         |                  |                        |             | 321         | 30-Apr-03                    | 8                            | 141/157                          | 235/235 | 182/190 | 298/302 |                       |          |                         |                                        |          |               |                                                            |         |         |

| Individual <sup>1</sup> | Sex <sup>2</sup> | Community <sup>3</sup> | Sample type | Sample Code | Collection Date <sup>4</sup> | mtDNA haplotype <sup>5</sup> | Microsatellite Loci <sup>6</sup> |         |         |         | urine WB <sup>7</sup> | fecal WB | fecal vRNA <sup>8</sup> | GenBank accession numbers <sup>9</sup> |          |          | SIVcpz Strain | Birth and Death Dates with Immigration Notes <sup>10</sup>            |                |
|-------------------------|------------------|------------------------|-------------|-------------|------------------------------|------------------------------|----------------------------------|---------|---------|---------|-----------------------|----------|-------------------------|----------------------------------------|----------|----------|---------------|-----------------------------------------------------------------------|----------------|
|                         |                  |                        |             |             |                              |                              | D18s536                          | D4s243  | D10s676 | D9s922  |                       |          |                         | pol                                    | gp41/ref |          |               |                                                                       |                |
| Ch-098<br>(Con't)       |                  |                        | KL fecal    | 323         | 30-Apr-03                    | 8                            | 141/157                          | 235/235 | 182/190 | 298/302 |                       | neg      |                         |                                        |          |          |               |                                                                       |                |
|                         |                  |                        | MT fecal    | 765         | 21-Mar-05                    | 8                            | 141/157                          | 235/235 | 182/190 | 298/302 |                       | neg      |                         |                                        |          |          |               |                                                                       |                |
|                         |                  |                        | MT fecal    | 764         | 8-Apr-05                     | 8                            |                                  |         |         |         |                       | neg      |                         |                                        |          |          |               |                                                                       |                |
|                         |                  |                        | MT fecal    | 836         | 21-Aug-05                    | 8                            |                                  |         |         |         |                       | neg      |                         |                                        |          |          |               |                                                                       |                |
|                         |                  |                        | MT fecal    | 835         | 2-Sep-05                     | 8                            | 141/157                          | 235/235 |         |         |                       | neg      |                         |                                        |          |          |               |                                                                       |                |
|                         |                  |                        | MT fecal    | 837         | 18-Oct-05                    | 8                            | 141/157                          | 235/235 | 182/190 | 298/302 |                       | neg      |                         |                                        |          |          |               |                                                                       |                |
|                         |                  |                        | MT fecal    | 1077        | 20-Mar-06                    | 8                            | 141/157                          | 235/235 | 182/190 | 298/302 |                       | neg      |                         |                                        |          |          |               |                                                                       |                |
|                         |                  |                        | MT fecal    | 1076        | 23-May-06                    |                              |                                  |         |         |         |                       | neg      |                         |                                        |          |          |               |                                                                       |                |
|                         |                  |                        | MT fecal    | 1203        | 7-Apr-07                     | 8                            | 141/157                          | 235/235 | 182/190 | 298/302 |                       | neg      |                         |                                        |          |          |               |                                                                       |                |
|                         |                  |                        | MT fecal    | 1266        | 13-Aug-07                    |                              |                                  |         |         |         |                       | neg      |                         |                                        |          |          |               |                                                                       |                |
|                         |                  |                        | MT fecal    | 1265        | 1-Oct-07                     |                              |                                  |         |         |         |                       | neg      |                         |                                        |          |          |               |                                                                       |                |
|                         |                  |                        | MT fecal    | 1267        | 24-Jan-08                    |                              |                                  |         |         |         |                       | neg      |                         |                                        |          |          |               |                                                                       |                |
|                         |                  |                        | MT fecal    | 1268        | 24-Jan-08                    |                              |                                  |         | 141/157 | 235/235 | 182/190               | 298/302  |                         | neg                                    |          |          |               |                                                                       |                |
| MT fecal                | 1349             | 8-Jun-08               |             |             |                              | 141/157                      | 235/235                          | 182/190 | 298/302 |         | neg                   |          |                         |                                        |          |          |               |                                                                       |                |
| Ch-099                  | F                | KL                     | fecal       | 299         | 17-Aug-03                    | 10                           | 141/177                          | 196/196 | 186/190 | 290/298 |                       | pos      | neg                     |                                        |          |          |               | DOB (2-Jul-77)*<br>DOD (13-Nov-06)<br>First arrived in KK (15-Sep-03) |                |
|                         |                  |                        | KL fecal    | 314         | 17-Aug-03                    | 10                           | 141/177                          | 196/196 | 186/190 | 290/298 |                       | pos      | neg                     |                                        |          |          |               |                                                                       |                |
|                         |                  |                        | KL fecal    | 316         | 21-Aug-03                    | 10                           | 141/177                          | 196/196 | 186/190 | 290/298 |                       | pos      | neg                     |                                        |          |          |               |                                                                       |                |
|                         |                  |                        | KK fecal    | 574         | 2-Oct-04                     | 10                           | 141/177                          | 196/196 | 186/190 | 290/298 |                       | pos      | pos (pol)               |                                        |          |          |               |                                                                       |                |
|                         |                  |                        | KK fecal    | 575         | 2-Oct-04                     | 10                           | 141/177                          | 196/196 | 186/190 | 290/298 |                       | pos      | pos (pol)               |                                        |          |          |               |                                                                       |                |
|                         |                  |                        | KK fecal    | 576         | 2-Oct-04                     | 10                           | 141/177                          | 196/196 | 186/190 | 290/298 |                       | pos      | pos (pol)               |                                        |          |          |               |                                                                       |                |
|                         |                  |                        | KK fecal    | 959         | 23-Dec-04                    |                              |                                  |         | 141/177 | 196/196 | 186/190               | 290/298  |                         | pos                                    |          |          |               |                                                                       |                |
|                         |                  |                        | KK fecal    | 715         | 11-May-05                    | 10                           | 141/177                          | 196/196 | 186/190 | 290/298 |                       | pos      |                         |                                        |          |          |               |                                                                       |                |
|                         |                  |                        | KK fecal    | 783         | 12-Jul-05                    | 10                           | 141/177                          | 196/196 | 186/190 | 290/298 |                       | pos      | pos                     | FJ895395                               | FJ895383 | TAN6     |               |                                                                       |                |
|                         |                  |                        | KK fecal    | 853         | 25-Oct-05                    |                              |                                  |         | 141/177 | 196/196 | 186/190               | 290/298  |                         | pos                                    |          |          |               |                                                                       |                |
| KK fecal                | 958              | 15-Mar-06              |             |             |                              | 141/177                      | 196/196                          | 186/190 | 290/298 |         | pos                   |          |                         |                                        |          |          |               |                                                                       |                |
| Ch-100                  | M                | KL                     | fecal       | 523         | 20-Jul-04                    | 13                           | 141/161                          | 196/200 | 190/190 | 298/302 |                       | neg      |                         |                                        |          |          |               | DOB unknown                                                           |                |
|                         |                  |                        | KL fecal    | 540         | 8-Aug-04                     | 13                           | 141/161                          | 196/200 | 190/190 | 298/302 |                       | neg      |                         |                                        |          |          |               |                                                                       |                |
|                         |                  |                        | KL fecal    | 558         | 30-Aug-04                    | 13                           | 141/161                          | 196/200 | 190/190 | 298/302 |                       | neg      |                         |                                        |          |          |               |                                                                       |                |
|                         |                  |                        | KL fecal    | 585         | 10-Oct-04                    | 13                           | 141/161                          | 196/200 | 190/190 | 298/302 |                       | neg      |                         |                                        |          |          |               |                                                                       |                |
|                         |                  |                        | KL fecal    | 588         | 13-Oct-04                    | 13                           | 141/161                          | 196/200 | 190/190 | 298/302 |                       | neg      |                         |                                        |          |          |               |                                                                       |                |
|                         |                  |                        | KL fecal    | 924         | 30-Dec-04                    |                              |                                  |         | 141/161 | 196/200 | 190/190               | 298/302  |                         | neg                                    |          |          |               |                                                                       |                |
|                         |                  |                        | KL fecal    | 779         | 29-Mar-05                    |                              |                                  |         | 141/161 | 196/200 | 190/190               | 298/302  |                         | neg                                    |          |          |               |                                                                       |                |
|                         |                  |                        | KL fecal    | 950         | 17-Nov-05                    |                              |                                  |         | 141/161 | 196/200 | 190/190               | 298/302  |                         | neg                                    |          |          |               |                                                                       |                |
|                         |                  |                        | KL fecal    | 936         | 5-Feb-06                     |                              |                                  |         | 141/161 | 196/200 | 190/190               | 298/302  |                         | neg                                    |          |          |               |                                                                       |                |
|                         |                  |                        | KL fecal    | 937         | 5-Feb-06                     |                              |                                  |         | 141/161 | 196/200 | 190/190               | 298/302  |                         | neg                                    |          |          |               |                                                                       |                |
|                         |                  |                        | KL fecal    | 948         | 17-Apr-06                    |                              |                                  |         | 141/161 | 196/200 | 190/190               | 298/302  |                         | neg                                    |          |          |               |                                                                       |                |
|                         |                  |                        | KL fecal    | 946         | 17-May-06                    |                              |                                  |         | 141/161 | 196/200 | 190/190               | 298/302  |                         | neg                                    |          |          |               |                                                                       |                |
|                         |                  |                        | KL fecal    | 1144        | 13-Aug-06                    |                              |                                  |         | 141/161 | 196/200 | 190/190               | 298/302  |                         | neg                                    |          |          |               |                                                                       |                |
|                         |                  |                        | KL fecal    | 1361        | 28-Jun-07                    | 13                           | 141/161                          | 196/200 | 190/190 | 298/302 |                       | neg      |                         |                                        |          |          |               |                                                                       |                |
|                         |                  |                        | KL fecal    | 1278        | 6-Dec-07                     |                              |                                  |         | 141/161 | 196/200 | 190/190               | 298/302  |                         | pos                                    |          |          |               |                                                                       |                |
|                         |                  |                        | KL fecal    | 1279        | 6-Dec-07                     |                              |                                  |         | 141/161 | 196/200 | 190/190               | 298/302  |                         | pos                                    | pos      | FJ895392 | TAN21         |                                                                       |                |
|                         |                  |                        | KL fecal    | 1487        | 17-Jul-08                    |                              |                                  |         | 141/161 | 196/200 | 190/190               | 298/302  |                         | pos                                    |          |          |               |                                                                       |                |
| KL fecal                | 1531             | 9-Aug-08               |             |             |                              | 141/161                      | 196/200                          | 190/190 | 298/302 |         | pos                   |          |                         |                                        |          |          |               |                                                                       |                |
| Ch-101                  | F                | KK                     | fecal       | 374         | 26-Mar-04                    |                              | 161/177                          | 196/196 | 190/190 | 290/302 |                       | neg      |                         |                                        |          |          |               | DOB (21-Apr-00)*<br>First arrived in KK (15-Sep-03)                   |                |
|                         |                  |                        | KK fecal    | 716         | 1-Mar-05                     | 10                           | 161/177                          | 196/196 | 190/190 | 290/302 |                       | neg      |                         |                                        |          |          |               |                                                                       |                |
|                         |                  |                        | KK fecal    | 784         | 20-Aug-05                    | 10                           | 161/177                          | 196/196 | 190/190 | 290/302 |                       | neg      |                         |                                        |          |          |               |                                                                       |                |
|                         |                  |                        | KK fecal    | 856         | 25-Oct-05                    | 10                           | 161/177                          | 196/196 | 190/190 | 290/302 |                       | neg      |                         |                                        |          |          |               |                                                                       |                |
|                         |                  |                        | KK fecal    | 960         | 25-Mar-06                    | 10                           | 161/177                          | 196/196 | 190/190 | 290/302 |                       | neg      |                         |                                        |          |          |               |                                                                       |                |
|                         |                  |                        | KK fecal    | 1444        | 14-Nov-08                    |                              |                                  |         | 161/177 | 196/196 | 190/190               | 290/302  |                         | neg                                    |          |          |               |                                                                       |                |
|                         |                  |                        | KK fecal    | 1111        | 19-Sep-06                    | 3                            | 161/161                          | 204/235 | 186/190 | 302/302 |                       | pos      | neg                     |                                        |          |          |               |                                                                       | DOB (5-Feb-04) |
| KK fecal                | 1112             | 16-Oct-06              | 3           | 161/161     | 204/235                      | 186/190                      | 302/302                          |         | pos     | neg     |                       |          |                         |                                        |          |          |               |                                                                       |                |
| Ch-102                  | F                | KK                     | fecal       | 623         | 7-Nov-04                     | 6                            | 141/161                          | 200/200 | 186/190 | 286/302 |                       | neg      |                         |                                        |          |          |               | DOB (18-Apr-04)                                                       |                |
|                         |                  |                        | KK fecal    | 965         | 31-Mar-06                    | 6                            | 141/161                          | 200/200 | 186/190 | 286/302 |                       | neg      |                         |                                        |          |          |               |                                                                       |                |
|                         |                  |                        | KK fecal    | 964         | 9-Apr-06                     | 6                            | 141/161                          | 200/200 | 186/190 | 286/302 |                       | neg      |                         |                                        |          |          |               |                                                                       |                |
| KK fecal                | 1154             | 5-Feb-07               |             |             |                              | 141/161                      | 200/200                          | 186/190 | 286/302 |         | neg                   |          |                         |                                        |          |          |               |                                                                       |                |
| KK fecal                | 1185             | 16-Mar-07              |             |             |                              | 141/161                      | 200/200                          | 186/190 | 286/302 |         | neg                   |          |                         |                                        |          |          |               |                                                                       |                |
| KK fecal                | 1221             | 6-Sep-07               |             |             |                              | 141/161                      | 200/200                          | 186/190 | 286/302 |         | neg                   |          |                         |                                        |          |          |               |                                                                       |                |
| KK fecal                | 1479             | 21-Oct-08              |             |             |                              | 141/161                      | 200/200                          | 186/190 | 286/302 |         | neg                   |          |                         |                                        |          |          |               |                                                                       |                |
| Ch-103                  | F                | KK                     | fecal       | 1111        | 19-Sep-06                    | 3                            | 161/161                          | 204/235 | 186/190 | 302/302 |                       | pos      | neg                     |                                        |          |          |               | DOB (5-Feb-04)                                                        |                |
|                         |                  |                        | KK fecal    | 1112        | 16-Oct-06                    | 3                            | 161/161                          | 204/235 | 186/190 | 302/302 |                       | pos      | neg                     |                                        |          |          |               |                                                                       |                |
| Ch-104                  | F                | KK                     | fecal       | 1094        | 14-Oct-06                    | 11                           | 153/157                          | 196/200 | 182/182 | 290/302 |                       | neg      |                         |                                        |          |          |               | DOB (10-Jul-04)<br>DLS (2-Oct-07)                                     |                |
|                         |                  |                        | KK fecal    | 1095        | 15-Oct-06                    | 11                           | 153/157                          | 196/200 | 182/182 | 290/302 |                       | neg      |                         |                                        |          |          |               |                                                                       |                |
|                         |                  |                        | KK fecal    | 1212        | 22-Jul-07                    |                              |                                  |         | 153/157 | 196/200 | 182/182               | 290/302  |                         | neg                                    |          |          |               |                                                                       |                |
| Ch-105                  | F                | KK                     | fecal       | 620         | 25-Sep-04                    | 4                            | 141/141                          | 235/235 | 158/182 | 298/302 |                       | neg      |                         |                                        |          |          |               | DOB (2-Jul-92)*<br>First arrived in KK (15-Sep-03)                    |                |
|                         |                  |                        | KK fecal    | 785         | 22-Jun-05                    | 4                            | 141/141                          | 235/235 | 158/182 | 298/302 |                       | neg      |                         |                                        |          |          |               |                                                                       |                |
|                         |                  |                        | KK fecal    | 961         | 15-Nov-05                    |                              |                                  |         | 141/141 | 235/235 | 158/182               | 298/302  |                         | neg                                    |          |          |               |                                                                       |                |
|                         |                  |                        | KK fecal    | 962         | 19-Mar-06                    |                              |                                  |         | 141/141 | 235/235 | 158/182               | 298/302  |                         | neg                                    |          |          |               |                                                                       |                |
|                         |                  |                        | KK fecal    | 963         | 21-May-06                    |                              |                                  |         | 141/141 | 235/235 | 158/182               | 298/302  |                         | neg                                    |          |          |               |                                                                       |                |
|                         |                  |                        | KK fecal    | 1165        | 11-Feb-07                    |                              |                                  |         | 141/141 | 235/235 | 158/182               | 298/302  |                         | neg                                    |          |          |               |                                                                       |                |
|                         |                  |                        | KK fecal    | 1220        | 16-Jun-07                    |                              |                                  |         | 141/141 | 235/235 | 158/182               | 298/302  |                         | neg                                    |          |          |               |                                                                       |                |
| KK fecal                | 1219             | 16-Jan-08              |             |             |                              | 141/141                      | 235/235                          | 158/182 | 298/302 |         | neg                   |          |                         |                                        |          |          |               |                                                                       |                |
| Ch-106                  | F                | KL                     | fecal       | 1140        | 10-Aug-06                    | 9                            | 141/177                          | 196/204 | 182/190 |         |                       | pos      | pos                     | FJ895401                               |          |          |               | DOB unknown                                                           |                |
|                         |                  |                        | KL fecal    | 1425        | 5-Nov-07                     | 9                            | 141/177                          | 196/204 | 182/190 |         |                       | pos      | pos                     |                                        |          |          |               |                                                                       |                |
|                         |                  |                        | KL fecal    | 901         | na                           | 9                            | 141/177                          | 196/204 | 182/190 |         |                       | pos      | pos                     | FJ895390                               | TAN20    |          |               |                                                                       |                |
| Ch-108                  | F                | KL                     | fecal       | 868         | 6-Jun-05                     |                              | 141/177                          | 204/231 | 182/190 | 290/298 |                       | neg      |                         |                                        |          |          |               | DOB (2-Jul-91)*<br>DLS (13-May-08)<br>First arrived in KK (25-Mar-06) |                |
|                         |                  |                        | KL fecal    | 881         | 25-Jul-05                    |                              | 141/177                          | 204/231 | 182/190 | 290/298 |                       | neg      |                         |                                        |          |          |               |                                                                       |                |
|                         |                  |                        | KK fecal    | 1000        | 16-Mar-06                    | 3                            | 141/177                          | 204/231 | 182/190 | 290/298 |                       | neg      |                         |                                        |          |          |               |                                                                       |                |
|                         |                  |                        | KK fecal    | 1090        | 26-Apr-06                    |                              |                                  |         | 141/177 | 204/231 | 182/190               | 290/298  |                         | neg                                    |          |          |               |                                                                       |                |
|                         |                  |                        | KK fecal    | 1304        | 28-Aug-07                    |                              |                                  |         | 141/177 | 204/231 | 182/190               | 290/298  |                         | neg                                    |          |          |               |                                                                       |                |
| Ch-111                  | F                | MT                     | fecal       | 1215        | 18-Jul-07                    |                              | 141/141                          | 200/235 | 182/190 | 268/302 |                       | neg      |                         |                                        |          |          |               | DOB (13-Jun-04)                                                       |                |
|                         |                  |                        | MT fecal    | 1332        | 9-Jun-08                     | 11                           | 141/141                          | 200/235 | 182/190 | 268/302 |                       | neg      |                         |                                        |          |          |               |                                                                       |                |
|                         |                  |                        | MT fecal    | 1354        | 12-Jul-08                    |                              |                                  |         | 141/141 | 200/235 | 182/190               | 268/302  |                         | neg                                    |          |          |               |                                                                       |                |
| Ch-112                  | F                | MT                     | fecal       |             |                              |                              |                                  |         |         |         |                       |          |                         |                                        |          |          |               |                                                                       |                |

| Individual <sup>1</sup> | Sex <sup>2</sup> | Comm-<br>unity <sup>3</sup> | Sample<br>type | Sample<br>Code | Collection<br>Date <sup>4</sup> | mtDNA<br>haplotype <sup>5</sup> | Microsatellite Loci <sup>6</sup> |         |         |         | urine<br>WB <sup>7</sup> | fecal<br>WB | fecal vRNA <sup>8</sup> | GenBank accession<br>numbers <sup>9</sup> |                 | SIVcpz<br>Strain | Birth and Death Dates<br>with Immigration Notes <sup>10</sup> |
|-------------------------|------------------|-----------------------------|----------------|----------------|---------------------------------|---------------------------------|----------------------------------|---------|---------|---------|--------------------------|-------------|-------------------------|-------------------------------------------|-----------------|------------------|---------------------------------------------------------------|
|                         |                  |                             |                |                |                                 |                                 | D18s536                          | D4s243  | D10s676 | D9s922  |                          |             |                         | <i>pol</i>                                | <i>gp41/nef</i> |                  |                                                               |
| Ch-114                  | F                | KK                          | fecal          | 1319           | 27-Jun-07                       |                                 | 141/173                          | 196/235 | 182/190 | 286/306 | neg                      |             |                         |                                           |                 |                  | DOB (9-Sep-06)                                                |
| Ch-115                  | M                | KK                          | fecal          | 1516           | 8-Nov-08                        | 11                              | 141/173                          | 196/235 | 182/190 | 286/306 | neg                      |             |                         |                                           |                 |                  | DOB (16-Oct-05)                                               |
|                         |                  |                             | fecal          | 1326           | 6-Sep-07                        | 3                               | 141/161                          | 204/204 | 186/192 | 302/306 | neg                      |             |                         |                                           |                 |                  |                                                               |
|                         |                  |                             | fecal          | 1521           | 19-Nov-08                       | 3                               | 141/161                          | 204/204 | 186/192 | 302/306 | neg                      |             |                         |                                           |                 |                  |                                                               |
| Ch-116                  | M                | KK                          | fecal          | 1488           | 24-Oct-08                       | 5                               | 141/157                          | 196/231 | 190/190 | 286/298 | neg                      |             |                         |                                           |                 | DOB (9-Nov-06)   |                                                               |
| Ch-117                  | F                | KK                          | fecal          | 1417           | 10-Sep-07                       | 11                              | 153/161                          | 204/204 | 186/190 | 286/298 | neg                      |             |                         |                                           |                 |                  | DOB (4-Jun-05)                                                |

<sup>1</sup>Black, uninfected; red, infected.

<sup>2</sup>F, female; M, male.

<sup>3</sup>Community in which sample was collected: KK, Kasekela; MT, Mitumba; KL, Kalande.

<sup>4</sup>na, not available.

<sup>5</sup>Numbers indicate mtDNA haplotypes as previously reported<sup>8</sup>.

<sup>6</sup>Fecal samples that were genotyped at a minimum of four microsatellite loci are shown in bold.

<sup>7</sup>pos, positive; neg, negative.

<sup>8</sup>FL, full-length genome sequence.

<sup>9</sup>Previously reported SIVcpz sequences are shown in italics<sup>7,32</sup>

<sup>10</sup>DOB, date of birth (estimated DOBs<sup>12</sup> are denoted by asterisk), DOD, date of death; DLS, date last seen.



**Supplementary Table 2. Horizontal transmission of SIVcpz**

| Individual         | Sex <sup>1</sup>   | Community <sup>2</sup> | Last SIVcpz negative sample | First SIVcpz positive sample | Age at infection (years) | Potential source of infection (sex) <sup>3</sup> | Observed matings <sup>4</sup> | Observed acts of aggression <sup>5</sup> |
|--------------------|--------------------|------------------------|-----------------------------|------------------------------|--------------------------|--------------------------------------------------|-------------------------------|------------------------------------------|
| Ch-004             | M                  | KK                     | 5-Nov-05                    | 12-Aug-06                    | 13.3                     | Ch-036 (F)                                       | none <sup>6</sup>             | none                                     |
|                    |                    |                        |                             |                              |                          | Ch-021 (F)                                       | none                          | none                                     |
|                    |                    |                        |                             |                              |                          | Ch-006 (M)                                       | n/a                           | none                                     |
|                    |                    |                        |                             |                              |                          | Ch-052 (M)                                       | n/a                           | none                                     |
|                    |                    |                        |                             |                              |                          | Ch-033 (22-Sep-05)                               | Ch-033 (12-Jun-06)            |                                          |
|                    |                    |                        |                             |                              |                          | Ch-022 (5-Sep-05)                                |                               |                                          |
|                    |                    |                        |                             |                              |                          | Ch-022 (7-Oct-05)                                |                               |                                          |
| Ch-022 (25-Jan-06) |                    |                        |                             |                              |                          |                                                  |                               |                                          |
| Ch-022 (24-May-06) |                    |                        |                             |                              |                          |                                                  |                               |                                          |
| Ch-021             | F                  | KK                     | 5-Dec-04                    | 11-May-05                    | 15.9                     | Ch-052 (M)                                       | none <sup>7</sup>             | Ch-052 (6-Mar-05) <sup>7</sup>           |
|                    |                    |                        |                             |                              |                          | Ch-006 (M)                                       | none                          | none                                     |
|                    |                    |                        |                             |                              |                          | Ch-004 (M)                                       | none                          | none                                     |
|                    |                    |                        |                             |                              |                          | Ch-036 (F)                                       | n/a                           | none                                     |
|                    |                    |                        |                             |                              |                          |                                                  | UNF <sup>8</sup> (16-Feb-05)  |                                          |
|                    |                    |                        |                             |                              |                          |                                                  | UNF <sup>8</sup> (2-Mar-05)   |                                          |
| Ch-036             | F                  | KK                     | 10-Dec-04                   | 15-Mar-06                    | 22.7                     | Ch-006 (M)                                       | Ch-006 (7-Feb-05)             | none                                     |
|                    |                    |                        |                             |                              |                          |                                                  | Ch-006 (11-Feb-05)            |                                          |
|                    |                    |                        |                             |                              |                          |                                                  | Ch-006 (19-Feb-05)            |                                          |
|                    |                    |                        |                             |                              |                          |                                                  | Ch-006 (25-Mar-05)            |                                          |
|                    |                    |                        |                             |                              |                          |                                                  | Ch-006 (29-Mar-05)            |                                          |
|                    |                    |                        |                             |                              |                          |                                                  | Ch-006 (23-Feb-06)            |                                          |
|                    |                    |                        |                             |                              |                          | Ch-052 (M)                                       | Ch-052 (7-Feb-05)             | none                                     |
| Ch-004 (M)         | none               | none                   |                             |                              |                          |                                                  |                               |                                          |
| Ch-021 (F)         | n/a                | none                   |                             |                              |                          |                                                  |                               |                                          |
| Ch-039             | F                  | MT                     | 15-Aug-02                   | 27-Feb-04                    | 11.7                     | Ch-045 (M)                                       | Ch-045 (19-Jun-03)            | Ch-045 (3-Dec-03)                        |
|                    |                    |                        |                             |                              |                          |                                                  | Ch-045 (20-Jun-03)            |                                          |
|                    |                    |                        |                             |                              |                          |                                                  | Ch-045 (29-Nov-03)            |                                          |
|                    |                    |                        |                             |                              |                          | Ch-048 (M)                                       | Ch-048 (19-Jun-03)            | none                                     |
|                    |                    |                        |                             |                              |                          |                                                  | Ch-048 (13-Jul-03)            |                                          |
|                    |                    |                        |                             |                              |                          |                                                  | Ch-048 (9-Sep-03)             |                                          |
|                    | Ch-048 (2-Dec-03)  |                        |                             |                              |                          |                                                  |                               |                                          |
|                    |                    | Ch-080 (26-Jul-02)     |                             |                              |                          |                                                  |                               |                                          |
| Ch-048             | M                  | MT                     | 27-Jan-02                   | 29-Oct-03                    | 17.3                     | Ch-039 (F)                                       | Ch-039 (19-Jun-03)            | none                                     |
|                    |                    |                        |                             |                              |                          |                                                  | Ch-039 (13-Jul-03)            |                                          |
|                    |                    |                        |                             |                              |                          |                                                  | Ch-039 (9-Sep-03)             |                                          |
|                    |                    |                        |                             |                              |                          | n/a                                              | none                          |                                          |
| Ch-052             | M                  | KK                     | 23-Dec-04                   | 24-Oct-05                    | 11.8                     | Ch-036 (F)                                       | Ch-036 (7-Feb-05)             | none                                     |
|                    |                    |                        |                             |                              |                          | Ch-021 (F)                                       | none                          | Ch-021 (6-Mar-05)                        |
|                    |                    |                        |                             |                              |                          | Ch-006 (M)                                       | n/a                           | none                                     |
|                    |                    |                        |                             |                              |                          | Ch-004 (M)                                       | n/a                           | none                                     |
|                    |                    |                        |                             |                              |                          |                                                  | Ch-022 (18-Feb-05)            |                                          |
|                    |                    |                        |                             |                              |                          |                                                  | Ch-033 (9-Apr-05)             |                                          |
|                    | Ch-071 (11-Jul-05) |                        |                             |                              |                          |                                                  |                               |                                          |
|                    |                    | Ch-071 (20-Aug-05)     |                             |                              |                          |                                                  |                               |                                          |

<sup>1</sup>F, female; M, male.<sup>2</sup>KK, Kasekela; MT, Mitumba.<sup>3</sup>SIVcpz infected chimpanzees who could have served as transmitters based on phylogenetic analysis of viral sequences (Supplementary Fig. 2).<sup>4</sup>Observed matings with SIVcpz infected chimpanzees prior to infection; n/a, not applicable.<sup>5</sup>Observed acts of aggression with SIVcpz infected or unknown chimpanzees prior to infection.<sup>6</sup>Ch-036 mated frequently with males other than Ch-004 during the infection window and is thus the most likely transmission source (note that not all matings are observed).<sup>7</sup>Ch-021 likely acquired SIVcpz by aggression because she gave birth to an infant on 5-Feb-04 and was thus either pregnant or lactating during her window of infection.<sup>8</sup>UNF, unknown female.

**Supplementary Table 3. Suspected vertical transmission of SIVcpz**

| Individual | Date of Birth <sup>1</sup> | Sample Date            | Age at Sampling (years) | SIVcpz infection <sup>2</sup> |            | Relationship          |
|------------|----------------------------|------------------------|-------------------------|-------------------------------|------------|-----------------------|
|            |                            |                        |                         | fecal antibodies              | fecal vRNA |                       |
| Ch-099     | 2-Jul-77*                  | 17-Aug-03              | 26                      | pos                           | neg        | mother <sup>4</sup>   |
|            |                            | 17-Aug-03              | 26                      | pos                           | neg        | mother                |
|            |                            | 21-Aug-03              | 26                      | pos                           | neg        | mother                |
|            |                            | 2-Oct-04               | 27                      | pos                           | pos        | mother                |
|            |                            | 2-Oct-04               | 27                      | pos                           | pos        | mother                |
|            |                            | 2-Oct-04               | 27                      | pos                           | pos        | mother                |
|            |                            | 23-Dec-04              | 27                      | pos                           | nd         | mother                |
|            |                            | 11-May-05              | 27                      | pos                           | nd         | mother                |
|            |                            | 12-Jul-05              | 28                      | pos                           | pos        | mother                |
|            |                            | 25-Oct-05              | 28                      | pos                           | nd         | mother                |
|            |                            | 15-Mar-06              | 28                      | pos                           | nd         | mother                |
| Ch-071     | 2-Jul-92*                  | 22-Jun-02              | 10                      | pos                           | pos        | daughter <sup>4</sup> |
|            |                            | 17-Aug-03              | 11                      | pos                           | nd         | daughter              |
|            |                            | 1-Jun-04               | 11                      | pos                           | neg        | daughter              |
|            |                            | 28-Nov-04              | 12                      | pos                           | neg        | daughter              |
|            |                            | 1-Mar-05               | 12                      | pos                           | pos        | daughter              |
|            |                            | 22-Jan-06              | 13                      | pos                           | pos        | daughter              |
|            |                            | 12-Feb-07              | 14                      | pos                           | nd         | daughter              |
|            |                            | 7-Apr-07               | 14                      | pos                           | nd         | daughter              |
|            |                            | 9-May-08               | 15                      | pos                           | nd         | daughter              |
| 15-Oct-08  | 16                         | pos                    | nd                      | daughter                      |            |                       |
| Ch-021     | 2-Jul-89*                  | 18-Aug-02              | 13                      | neg                           | nd         | mother                |
|            |                            | 6-Aug-03               | 14                      | neg                           | nd         | mother                |
|            |                            | 29-May-04 <sup>3</sup> | 14                      | neg                           | nd         | mother                |
|            |                            | 2-Dec-04 <sup>3</sup>  | 15                      | neg                           | nd         | mother                |
|            |                            | 5-Dec-04 <sup>3</sup>  | 15                      | neg                           | nd         | mother                |
|            |                            | 11-May-05              | 15                      | pos                           | pos        | mother                |
|            |                            | 20-Nov-05              | 16                      | pos                           | nd         | mother                |
|            |                            | 16-Mar-06              | 16                      | pos                           | nd         | mother                |
|            |                            | 14-Oct-06              | 17                      | pos                           | pos        | mother                |
|            |                            | 11-Feb-07              | 17                      | pos                           | nd         | mother                |
| 23-Oct-08  | 19                         | pos                    | nd                      | mother                        |            |                       |
| Ch-103     | 5-Feb-04 <sup>3</sup>      | 19-Sep-06              | 2.6                     | pos <sup>5</sup>              | neg        | daughter              |
|            |                            | 16-Oct-06              | 2.7                     | pos <sup>5</sup>              | neg        | daughter              |
| Ch-033     | 2-Jul-85*                  | 23-Oct-01              | 16                      | pos                           | neg        | mother                |
|            |                            | 4-Jan-02               | 16                      | pos                           | neg        | mother                |
|            |                            | 6-Sep-04               | 19                      | pos                           | nd         | mother                |
|            |                            | 13-Dec-04              | 19                      | pos                           | nd         | mother                |
|            |                            | 12-Jul-05              | 20                      | pos                           | pos        | mother                |
|            |                            | 31-Jan-06              | 20                      | pos                           | nd         | mother                |
|            |                            | 23-Feb-06              | 20                      | pos                           | nd         | mother                |
|            |                            | 9-Aug-07               | 22                      | pos                           | nd         | mother                |
| Ch-062     | 18-Oct-00                  | 5-Aug-02               | 1.8                     | pos <sup>5</sup>              | neg        | son                   |

<sup>1</sup>Asterisks denote estimated birth dates<sup>1,2</sup>.

<sup>2</sup>pos, positive; neg, negative; nd, not done.

<sup>3</sup>Ch-021 was SIVcpz negative for at least 10 months following the birth of Ch-103.

<sup>4</sup>Presumed mother/daughter pair.

<sup>5</sup>Western blot results may indicate the presence of maternal antibodies in the stool of nursing infants.

**Supplementary Table 4. Infant mortality**

| Mother <sup>1</sup> | Mother's SIVcpz status at delivery <sup>2</sup> | Infant <sup>3</sup>  | Infant sex <sup>4</sup> | Infant birth date | Infant SIVcpz status <sup>5</sup> | Infant age at death (years) |
|---------------------|-------------------------------------------------|----------------------|-------------------------|-------------------|-----------------------------------|-----------------------------|
| Ch-001              | neg                                             | Ch-077               | M                       | 15-Jan-04         | neg                               | Alive <sup>6</sup>          |
| Ch-002              | neg                                             | BB-002a              | M                       | 4-Apr-03          | n/a                               | 1.6                         |
| Ch-002              | neg                                             | Ch-097               | F                       | 14-Dec-05         | neg                               | Alive                       |
| Ch-009              | neg                                             | Ch-102               | F                       | 18-Apr-04         | neg                               | Alive                       |
| Ch-009              | neg                                             | BB-009a              | F                       | 14-Nov-07         | n/a                               | Alive                       |
| Ch-011              | neg                                             | BB-011a              | F                       | 11-Oct-02         | n/a                               | 1.9                         |
| Ch-015              | neg                                             | BB-015a <sup>7</sup> | M                       | 18-Jul-08         | n/a                               | 0.0                         |
| Ch-015              | neg                                             | BB-015b <sup>7</sup> | M                       | 18-Jul-08         | n/a                               | 0.0                         |
| Ch-015              | neg                                             | BB-015c              | M                       | 28-Apr-06         | n/a                               | 0.4                         |
| Ch-019              | neg                                             | BB-019a              | M                       | 25-Feb-04         | n/a                               | 0.2                         |
| Ch-019              | neg                                             | Ch-117               | F                       | 4-Jun-05          | neg                               | Alive                       |
| Ch-021              | neg                                             | Ch-103               | F                       | 5-Feb-04          | pos                               | Alive                       |
| Ch-025              | neg                                             | Ch-073               | F                       | 17-Jun-01         | neg                               | Alive                       |
| Ch-025              | neg                                             | Ch-116               | M                       | 9-Nov-06          | neg                               | Alive                       |
| Ch-026              | neg                                             | BB-026a              | na                      | 11-Sep-07         | n/a                               | 0.1                         |
| Ch-028              | neg                                             | Ch-072               | M                       | 25-Aug-04         | neg                               | 2.2                         |
| Ch-031              | neg                                             | Ch-056               | M                       | 9-Jun-01          | neg                               | Alive                       |
| Ch-032              | neg                                             | Ch-114               | F                       | 9-Sep-06          | neg                               | Alive                       |
| Ch-036              | pos                                             | BB-036a              | F                       | 21-Mar-07         | n/a                               | 0.6                         |
| Ch-039              | pos                                             | BB-039a              | n/a                     | 15-May-07         | n/a                               | 0.0                         |
| Ch-041              | neg                                             | Ch-104               | F                       | 10-Jul-04         | neg                               | 3.2                         |
| Ch-042              | neg                                             | BB-042a              | F                       | 18-Nov-04         | n/a                               | 0.7                         |
| Ch-042              | neg                                             | BB-042b              | M                       | 3-Aug-06          | n/a                               | Alive                       |
| Ch-044              | neg                                             | Ch-094               | F                       | 31-Mar-06         | neg                               | Alive                       |
| Ch-046              | neg                                             | Ch-112               | F                       | 7-May-05          | neg                               | Alive                       |
| Ch-047              | neg                                             | BB-047a              | F                       | 8-Jan-06          | n/a                               | Alive                       |
| Ch-049              | neg                                             | Ch-111               | F                       | 13-Jun-04         | neg                               | Alive                       |
| Ch-050              | neg                                             | Ch-115               | M                       | 16-Oct-05         | neg                               | Alive                       |
| Ch-066              | neg                                             | BB-066a              | M                       | 15-Jul-07         | neg                               | Alive                       |
| Ch-071              | pos                                             | BB-071a              | M                       | 5-Aug-07          | n/a                               | 0.1                         |
| Ch-076              | neg                                             | BB-076a              | M                       | 28-Jan-07         | n/a                               | Alive                       |
| Ch-078              | neg                                             | Ch-090               | M                       | 20-Nov-05         | neg                               | Alive                       |
| Ch-099              | pos                                             | BB-099a              | F                       | 21-Oct-05         | n/a                               | 0.99                        |
| Ch-105              | neg                                             | BB-105a              | M                       | 6-Sep-07          | n/a                               | Alive                       |

<sup>1</sup>Black, uninfected; red, SIVcpz infected.

<sup>2</sup>pos, positive; neg, negative.

<sup>3</sup>BB numbers denote unsampled infants who are not included in Supplementary Table 1.

<sup>4</sup>F, female; M, male.

<sup>5</sup>n/a, data not available.

<sup>6</sup>Alive at the end of the study period (31-Dec-08).

<sup>7</sup>Twins.

## SUPPLEMENTARY MATERIALS AND METHODS

**Chimpanzee demographic and behavioral data.** Kasekela and Mitumba chimpanzees have been observed on a daily basis since the 1960s and 1980s, respectively<sup>12,13,26</sup>. Each day, a team of field assistants follows one "focal" individual from each community from dawn to dusk (Supplementary Fig. 1c). Behavioral data are recorded for this particular chimpanzee as well as other chimpanzees interacting with this individual. In addition, conspicuous interactions (e.g., mating or aggression) involving any member of the group are also recorded. The types of data collected include the incidence and timing of mating, aggression, grooming and nursing, as well as geographic location, group composition, and foraging behavior. Since March 2004, Kasekela and Mitumba chimpanzees have also been routinely monitored for baseline health data, with general body condition, skin abnormalities, wounds and sores, lameness, respiratory signs (e.g., coughing and sneezing), and gastrointestinal symptoms (e.g., stool consistency) recorded for focal individuals on a daily basis<sup>30</sup>. In addition, a team of veterinarians performs on-site necropsies and determines the cause of death for all chimpanzees who are found dead in the park.

**Sample collection.** Most Kasekela and Mitumba chimpanzees tolerate human observers at close distance which facilitates sample collection; however, a subset of apes, in particular infants, are more difficult to sample, thus resulting in less frequent analyses. Urine samples were collected by placing plastic bags under night nests and stored without preservatives<sup>7</sup>. Fecal samples (~20g) were collected under direct observation and placed into 50 ml tubes containing 20 ml of RNA*later* (Ambion, Austin, TX)<sup>7</sup>. Specimens were frozen on site, shipped at ambient temperatures, and stored at  $-80^{\circ}\text{C}$  upon receipt<sup>7,8,31</sup>.

**Non-invasive SIVcpz testing.** Chimpanzee fecal and urine samples were examined for the presence of SIVcpz antibodies using an enhanced chemiluminescent Western blot assay as described<sup>2,7,8</sup>. A

subset of antibody positive fecal samples was also tested for the presence of SIVcpz sequences by reverse transcriptase polymerase chain reaction (RT-PCR) amplification of fecal RNA<sup>7,8,31</sup>, using SIVcpzPts specific *pol* and *env-nef* primers (Supplementary Table 1). cDNA was synthesized using the R1 primer, followed by nested PCR using primers F1/R1 and F2/R2. A ~890-bp *pol* fragment was amplified using PTS-*pol*-F1 (5'-GTTACCTGGGTACCTGAGTGGGA-3'), PTS-*pol*-R1 (5'-ACTACTGCCCTTCACCTTTCC-3'), PTS-*pol*-F2 (5'-TTTTATGTAGATGGGGCAGC-3'), and PTS-*pol*-R2 (5'-CAATCCCCCCTTTTCTTTTAAAATTGTG-3'). A shorter ~500-bp *pol* fragment was amplified using PTS-*spol*-F1 (5'-TGGGTACCAGCMCATAAAGGYATAGG-3'), PTS-*pol*-R1, PTS-*spol*-F2 (5'-GARGACCATGAYAAATATCA-3'), and PTS-*pol*-R2. A ~780-bp *env/nef* fragment was amplified using PTS-*env/nef*-F1 (5'-ATTGGTTTGAYATAACACAATG-3'), PTS-*env/nef*-R1 (5'-CCCATCCAGTCCCCCCTTTTC-3'), PTS-*env/nef*-F2 (5'-CACAATGGCTRTGGTATATAA-3') and PTS-*env/nef*-R2 (5'-CTTTTCTTTTAARAACCATGACAG-3'). RT-PCR products were gel purified and sequenced directly<sup>7,8</sup>. For TAN17 (from Ch-030), only a 286 bp *env* (gp41 region) fragment was amplified due to a misaligned primer. All newly derived TAN sequences were submitted to GenBank and their accession numbers are listed in Supplementary Table 1.

**Genotyping of fecal samples.** Fecal DNA was extracted as described<sup>7,8</sup> and used to amplify a 498-bp mitochondrial (mt) genome fragment (D loop) for haplotype determination<sup>8</sup>. Fecal DNA was also used to amplify highly polymorphic microsatellite loci as well as a region of the amelogenin gene for sex determination (Supplementary Table 1)<sup>8</sup>.

**SIVcpz prevalence.** The prevalence of SIVcpz infection in Kasekela and Mitumba was determined for each of the past nine calendar years (Fig. 1). For these analyses, individuals were considered SIVcpz positive if they had detectable antibodies in their urine or fecal samples (a positive Western blot is diagnostic for SIVcpz infection, except for nursing infants who may have breast-milk derived maternal antibodies in their stool). The proportion of SIVcpz infected apes was determined by dividing the

number of positive individuals by the total number of apes tested (Fig. 1b). Most chimpanzees were tested at least once every year (Fig. 1, Supplementary Table 1). If a chimpanzee was not sampled in a particular year, the individual was excluded from the analysis for that calendar year (e.g., Ch-036 in 2005); however, because SIVcpz causes a chronic life-long infection, it was possible to infer infection data for some of the missing time points. For example, Ch-006 was not sampled in 2006 and 2007, but known to be SIVcpz infected from prior analyses. Since this male was observed (and thus known to be alive) in January 2007, he was counted as SIVcpz infected in both 2006 and 2007 calendar years (indicated by asterisks in Fig. 1a). Similarly, Ch-012 tested SIVcpz negative in 2004, but was not sampled in 2005. Since this female tested negative again in 2006, she was counted as uninfected in 2005. Finally, Ch-098 immigrated to Mitumba in June 2004, but was first tested in that community in April 2005. Since several samples collected in Kalande in 2002 and 2003 were SIVcpz negative (see Supplementary Table 1), Ch-098 was counted as uninfected in 2004.

**Phylogenetic analyses.** To determine the evolutionary relationships of the newly derived Gombe viruses to previously characterized HIV-1 and SIVcpz strains, phylogenetic trees were constructed from available *pol* and *env-nef* sequences, including representatives of all major SIVcpzPtt, SIVcpzPts, SIVgor and HIV-1 (groups M, N and O) lineages. In all of these analyses, Gombe viruses formed a single monophyletic clade within the SIVcpzPts radiation (not shown). For subsequent tree constructions, we thus selected two SIVcpzPts strains (ANT and BF1167) from the Democratic Republic of Congo as outgroups (GenBank accession numbers: U42720 and FJ869116/FJ869117). Nucleotide sequences were aligned using CLUSTAL W<sup>32</sup>; sites that could not be aligned unambiguously were excluded. Trees were inferred by Bayesian<sup>28</sup> (Supplementary Fig. 2a and b) or maximum likelihood<sup>33</sup> (Supplementary Fig. 2c and d) methods, using a general time reversible model with gamma-distributed site-to-site rate variation and allowing for invariable sites (GTR+I+G)<sup>34</sup>. Posterior probabilities were calculated using MrBayes<sup>28</sup> with 10<sup>6</sup> generations (average standard deviations < 0.01) and 25% burn in.

To calculate the time to the most recent common ancestor (tMRCA) of the Gombe SIVcpz clade, alignments of *pol* and *env-nef* sequences of TAN1, TAN2, TAN3, TAN6, TAN8, TAN10, TAN11, TAN12, TAN13 and BF1167 were concatenated (total length 1,470 nt) and analyzed using programs from the BEAST package<sup>35</sup>. Due to the limited number and length of the Gombe sequences, we were unable to obtain a robust tMRCA estimate. We thus calculated the evolutionary rate of HIV-1 for the same concatenated region in a separate BEAST analysis. Using 37 group M sequences from the Los Alamos Subtype Reference Set and their sample times (in years) as priors in a relaxed clock model<sup>36</sup>, we obtained a rate of  $1.40 \times 10^{-3}$  substitutions/site/year and a median HIV-1 group M tMRCA estimate of 94.7 years (95% Highest Probability Density interval [HPD]: 63.7-156.7) consistent with previous analyses<sup>37,38</sup>. Assuming that SIVcpz has evolved at a similar rate as HIV-1, we then used this rate as well as the sample dates for the different TAN viruses to estimate tMRCA of the Gombe clade. Four independent chains of  $10^7$  iterations were analyzed with each chain showing results consistent with others from the same set. Times to MRCA were determined from the combined runs (with 10% burn in) using Tracer version 1.4.1. This yielded a median date of 1851 for the Gombe tMRCA (95% HPD: 1730-1923).

**Mortality analyses.** To determine whether SIVcpz infection is associated with an increased mortality risk, we modeled chimpanzee death as a discrete event-history process<sup>29,39</sup>. We adopted this particular approach (with the “chimpanzee-year-of-observation” as the unit of analysis) because data were collected from a free-ranging population, and vital events and SIVcpz infection data were frequently interval censored. Vital events (i.e., death, birth) and the change of time-varying covariates (i.e., SIVcpz infection) were recorded for yearly intervals. Individuals who had disappeared were classified as dead based on previously reported criteria<sup>15,16</sup>, and none of the deceased chimpanzees was a known victim of human poaching. Only vital events from known members of the Kasekela and Mitumba communities were included. The mortality hazard, which is a strict conditional probability for discrete models, was then estimated as a function of covariates using a binomial generalized linear model with

a complementary log-log link. This represents the discrete-time equivalent of the proportional hazards assumption in continuous time Cox regression models<sup>29,40</sup>. Exploration of age-effects using likelihood-based model selection criteria<sup>41</sup> revealed that a cubic specification of age provided the best model fit. Because sex has previously been shown to affect the death hazard in chimpanzees<sup>15</sup>, we also included this parameter as a covariate. Two different event definitions were used. For a maximally conservative estimate, two fecal antibody positive but vRNA negative infants (Ch-062 and Ch-103) were classified as SIVcpz negative (i.e., assumed to have maternal antibodies in their stool), two incident infections (Ch-036 and Ch-039) were assumed to have occurred one year earlier (in 2005 and 2003, respectively; Fig. 1a and Supplementary Table 1), and two uninfected females who went missing for more than one year (Ch-038 and Ch-108) were counted as being dead. For a less stringent estimate, the two infants were assumed to be infected, the two incident infections were counted negative in the unsampled years, and the two missing females were censored, i.e. assumed to have migrated to Kalande or outside the park. Supplementary Table 5 lists the coefficients, hazard ratios, 95% confidence intervals (CI) for the hazard ratios (lower and upper), and *p*-values corresponding to the two event definitions.

| <b>Supplementary Table 5. SIVcpz associated mortality</b> |             |              |        |        |                 |
|-----------------------------------------------------------|-------------|--------------|--------|--------|-----------------|
| Maximally conservative event definitions                  |             |              |        |        |                 |
| Variable                                                  | Coefficient | Hazard Ratio | Lower  | Upper  | <i>p</i> -value |
| Intercept                                                 | -2.34       | 0.10         | 0.02   | 0.59   | 0.011           |
| age                                                       | -0.46       | 0.63         | 0.43   | 0.91   | 0.014           |
| age <sup>2</sup>                                          | 0.02        | 1.02         | 1.00   | 1.04   | 0.020           |
| age <sup>3</sup>                                          | -0.0002     | 0.9998       | 0.9995 | 0.9999 | 0.057           |
| male sex                                                  | 0.40        | 1.50         | 0.56   | 4.05   | 0.424           |
| SIVcpz pos                                                | 2.28        | 9.76         | 2.78   | 34.26  | <0.0001         |
| Less conservative event definitions                       |             |              |        |        |                 |
| Variable                                                  | Coefficient | Hazard Ratio | Lower  | Upper  | <i>p</i> -value |
| intercept                                                 | -2.86       | 0.06         | 0.01   | 0.39   | 0.003           |
| age                                                       | -0.59       | 0.55         | 0.37   | 0.83   | 0.004           |
| age <sup>2</sup>                                          | 0.03        | 1.03         | 1.01   | 1.05   | 0.007           |
| age <sup>3</sup>                                          | -0.0003     | 0.9997       | 0.9994 | 0.9999 | 0.022           |
| male sex                                                  | 0.69        | 1.99         | 0.68   | 5.88   | 0.211           |
| SIVcpz pos                                                | 2.75        | 15.63        | 4.72   | 51.77  | <0.0001         |



The results show that SIVcpz infection status has a strong and highly significant impact on the mortality hazard ( $p < 0.0001$ ). Under the maximally conservative event definitions, SIVcpz infection increased the hazard of dying by  $\exp(2.28) = 9.76$  times; under the less conservative model, the hazard increased by a similar factor of  $\exp(2.75) = 15.63$ . 95% confidence intervals were wide due to the small sample size: For the maximally conservative approach, CI values were 2.8 and 34.3; for the less conservative approach, CI values were 4.7 and 51.8.

To put these results into perspective, we examined survival differences in a second SIV infected primate host. Vital data were obtained from 167 SIVsmm infected and 62 uninfected sooty mangabeys housed at the Yerkes Regional Primate Center. Like the Gombe chimpanzees, these sooty mangabeys were naturally infected; however, unlike the Gombe chimpanzees, the age at which they acquired SIVsmm was not determined. The absence of age-specific infection data precluded the need to analyze time-varying covariates. Moreover, there was no interval censoring since the sooty mangabeys were housed (and thus continuously observed) at a primate center. We thus employed a simple Cox proportional hazards regression model to examine potential survival differences, using only entry age and SIVsmm infection status as covariates<sup>29,42</sup>. The results showed a significantly negative effect of entry age on sooty mangabey mortality (Supplementary Table 6), i.e., adult sooty mangabeys had lower mortality rates than infants ( $p < 0.0001$ ); however, no such effect was seen for SIVsmm infection: although the coefficient on SIVsmm status was negative, this was not statistically significant ( $p = 0.55$ ).

**Supplementary Table 6. SIVsmm associated mortality**

| Variable   | Coefficient | Hazard Ratio | se(Coef) | z value | Pr(> z ) |
|------------|-------------|--------------|----------|---------|----------|
| entry age  | -0.125      | 0.882        | 0.0287   | -4.346  | <0.0001  |
| SIVsmm pos | -0.157      | 0.855        | 0.2651   | -0.593  | 0.55000  |

**Fertility analyses.** To determine the impact of SIVcpz infection on female fertility, we compared the number of births to infected versus uninfected females, counting a pair of twins as one birth. The fertility of female chimpanzees is influenced by several factors. Adolescent females experience a period of subfecundity<sup>43,44</sup>, as do females who have recently immigrated from another community<sup>45</sup>, and

females nursing a young infant experience lactational subfecundity until the infant is weaned<sup>43,44</sup>. To control for these factors, we compared births per female-years-at-risk for both infected and uninfected females, rather than simply comparing their total number of births. For each calendar year in which the infection status of the female was known, we determined whether she was at risk of giving birth based on long-term fertility data obtained for Gombe chimpanzees<sup>43,44,46</sup>, using the minimum observed periods of adolescent sub-fecundity (min = 0.9 years; median = 2.5, n = 15 females), time between immigration and birth (min = 0.92 years; median = 2.66, n = 24 females), and inter-birth interval when the previous infant survived (min = 3.28 years; median = 5.51, n = 57 intervals). Thus, we considered nulliparous females who remained in their natal community to be at risk of birth if they had been showing full sexual cycles during which they mated with an adult male for at least one year before the midpoint of the year being scored. Likewise, we scored immigrant females without infants as being at risk if they had been in the community for at least one year before the mid-point of the year being scored. Finally, we scored females who had a previous surviving infant to be at risk if the previous infant was older than 3.28 years by the middle of the year being scored and the female had resumed sexual cycling by May 1 of that calendar year (given a gestation period of about 7.5 months, a female must have mated by May to produce an infant by the end of that calendar year). These measures are conservative, in that for each factor, the median interval was one to two years longer than the minimum interval. The results yielded 29 births per 90 years-at-risk for uninfected females, compared to 4 births per 30 years-at-risk for infected females, indicating that SIVcpz infected females were significantly less likely to give birth than uninfected females (Fisher's exact test:  $p=0.034$ ; assuming that SIVcpz infection does not increase female fertility, a one-tailed test was used).

**Infant mortality.** All infants born between 2000 and 2008 to females of known SIVcpz infection status were scored as living or dying before one year of age. Four of four infants born to females who were SIVcpz positive at the time of delivery died before they reached 12 months of age, while 6 of 30 infants born to SIVcpz negative females died before their first birthday (Supplementary Table 4). Two of the

latter were twins, which generally have a higher mortality. The results showed that infants born to infected mothers had a significantly higher mortality rate than infants born to uninfected mothers (Fisher's exact test:  $p < 0.005$ ; assuming that SIVcpz infection does not increase infant survival, a one-tailed test was used).

**Necropsy and tissue collection.** Complete necropsies were performed using strict safety precautions. Ch-016 was necropsied within 15 hours of death; The bodies of the other four chimpanzees (Ch-036, Ch-045, Ch-069 and Ch-099) were recovered within 6 to 18 hours of death and frozen ( $-20^{\circ}\text{C}$ ) for up to two months prior to necropsy. Sections of all tissues were fixed in 10% neutral buffered formalin, paraffin-embedded, cut at 3-5 mm, stained with hematoxylin and eosin, and evaluated by veterinary pathologists. Some tissue samples were also fixed in RNA*later*. Both gross and histopathological findings were used to determine the cause of death: Ch-016 died of conditions related to old age; Ch-036 died of an AIDS-like syndrome; Ch-045 died of traumatic injuries following conspecific (intra-group) aggression involving two other males; Ch-069 died of trauma induced vertebral subluxation (C6-7) and associated spinal cord injury; and Ch-099 died of trauma induced non-union fracture of a vertebra (T5) and associated myelomalacia. Due to the warm climate and different intervals between death and carcass retrieval, tissues exhibited varying degrees of autolysis, most notably in the gastrointestinal mucosa, which precluded quantitative immunohistochemistry in the gut; however, lymph node and spleen tissues were generally well preserved. For the initial histological evaluation, veterinary pathologists were blinded to the infection status of the deceased ape, except for Ch-045 whose status was known prior to necropsy. This was also true for the first evaluation of all immunohistochemically stained slides which were analyzed under code.

***In situ* hybridization, immunohistochemistry and quantitative image analysis.** SIVcpz specific *in situ* hybridization (ISH) was performed using SIVcpz anti-sense and control (sense) riboprobes. SIVcpz $Pts$  specific probes were generated by amplifying *gag*, *pol*, *vif*, *env* and *nef* fragments from

TAN2 and TAN3 genomes<sup>31</sup>. Amplicons were cloned into the pCR-Blunt II-topo vector (Invitrogen), between SP6 and T7 promoters. These clones were linearized and transcribed with <sup>35</sup>S-labelled dUTP or dCTP to generate anti-sense and sense radio-labeled riboprobes depending on the orientation of the gene fragment and the promoter used. Transcripts were pooled (i.e. anti-sense fragments from all TAN2 and TAN3 clones) and ISH was performed as previously described<sup>20,47</sup>. Immunohistochemistry was performed on paraffin sections (3-5 µm). Tissue sections were deparaffinized and heat induced epitope retrieval performed using a pressure cooker decloaking chamber (Biocare Medical). Endogenous peroxidase was blocked using hydrogen peroxide (1.5% - 3%) in methanol or in TBS (pH 7.4). Slides were either stained manually or using the IntelliPATH FLX autostaining system using a non-biotin polymer detection system (Super Enhancer, BioGenex or Biocare Medical). Primary antibodies were incubated for 30 minutes to 1 hour at room temperature, followed by incubation with a polymer based detection system according to manufacturer's recommendations. After washing, sections were developed with the chromagen 3,3'-diaminobenzidine (DAB; BioGenex or Vector Laboratories) for 5 minutes, counterstained with hematoxylin (BioGenex or Biocare Medical), and mounted in Permount (Fisher Scientific). Primary antibodies used were mouse monoclonal anti-CD3 (clone F7.2.38; Dako), rabbit anti-CD3 (Cat no. A0452; Dako), mouse monoclonal anti-CD4 (clone 1F6; Vector Labs), mouse monoclonal anti-CD20 (clone L26; Labvision) and mouse monoclonal anti-CD79a (clone HM47/A9; Biocare Medical). Masson's Trichrome staining was performed as previously reported<sup>48</sup>. Quantitative image analysis was performed on stained whole tissue sections scanned at high magnification (400x) using the ScanScope CS System (Aperio Technologies, Inc.) yielding high-resolution data from the entire stained tissue section. In order to determine CD4+ T cell levels within splenic white pulp, the periarteriolar lymphoid sheaths (PALS; splenic equivalent of the T cell zone of secondary lymph nodes) were manually extracted in Photoshop CS3 using the magnetic lasso tool from high magnification whole tissue images obtained from the Aperio ScanScope CS System. Individually isolated PALS were saved into separate files and the percent area that stained positive for CD4 was

determined using tools from Reindeer Graphics<sup>21,48</sup>. The frequencies of CD4+ cells were compared among individual chimpanzees, and between infected and uninfected chimpanzees, using analyses of variance. An F-test indicated highly significant differences among individuals ( $p < 0.001$ ). For the comparison of the three infected individuals with the two uninfected individuals, it was assumed that SIVcpz infection would not lead to an increased CD4+ T cell count, and so a one-tailed test was used; the F-test yielded a p value of 0.024, indicating significantly lower counts in the SIVcpz infected individuals. Similarly, t-tests between individuals, with Tukey's adjustment for multiple comparisons, were significant in all 10 pairwise tests ( $p < 0.05$ ).

#### Supplementary References:

30. Lonsdorf, E.V., Travis, D., Pusey, A.E. & Goodall, J. Using retrospective health data from the Gombe chimpanzee study to inform future monitoring efforts. *Am J Primatol* **68**, 897-908 (2006).
31. Takehisa, J., *et al.* Generation of infectious molecular clones of simian immunodeficiency virus from fecal consensus sequences of wild chimpanzees. *J Virol* **81**, 7463-75 (2007).
32. Thompson, J.D., Higgins, D.G. & Gibson, T.J. CLUSTAL W: improving the sensitivity of progressive multiple sequence alignment through sequence weighting, position-specific gap penalties and weight matrix choice. *Nucleic Acids Res* **22**, 4673-4680 (1994).
33. Guindon, S. & Gascuel, O. A simple, fast, and accurate algorithm to estimate large phylogenies by maximum likelihood. *Syst Biol* **52**, 696-704 (2003).
34. Yang, Z. Estimating the pattern of nucleotide substitution. *J Mol Evol* **39**, 105-111 (1994).
35. Drummond, A.J. & Rambaut, A. BEAST: Bayesian evolutionary analysis by sampling trees. *BMC Evol Biol* **7**, 214 (2007).
36. Drummond, A.J., Ho, S.Y., Phillips, M.J. & Rambaut, A. Relaxed phylogenetics and dating with confidence. *PLoS Biol* **4**, e88 (2006).
37. Korber, B., *et al.* Timing the ancestor of the HIV-1 pandemic strains. *Science* **288**, 1789-1796 (2000).

38. Worobey, M., *et al.* Direct evidence of extensive diversity of HIV-1 in Kinshasa by 1960. *Nature* **455**, 661-664 (2008).
39. Allison, P.D. *Event History Analysis: Regression Models for Event History Data*, (Sage Publications, Beverly Hills 1984).
40. Hosmer, D.W. & Lemeshow, D. *Applied Logistic Regression, 2nd ed*, (Wiley, New York 2000).
41. Burnham, K.P. & Anderson, D.R. *Model Selection and Inference: A Practical Information-Theoretic Approach. 2nd ed*, (Springer, New York 2002).
42. Klein, J.P. & Moeschberger, M.L. *Survival Analysis: Techniques for Censored and Truncated Data*, (Springer-Verlag, New York 1997).
43. Goodall, J. Population dynamics during a 15-year period in one community of free-living chimpanzees in the Gombe National Park, *Z Tierpsychol* **61**, 1-60 (1983).
44. Wallis, J. A survey of reproductive parameters in the free-ranging chimpanzees of Gombe National Park. *J Reprod Fertil* **109**, 297-307 (1997).
45. Boesch, C. & Boesch, H. *The Chimpanzees of the Tai Forest*, (Oxford University Press, Oxford, England 2000).
46. Anne Pusey, unpublished data.
47. Li, Q., *et al.* Peak SIV replication in resting memory CD4<sup>+</sup> T cells depletes gut lamina propria CD4<sup>+</sup> T cells. *Nature* **434**, 1148-1152 (2005).
48. Schacker, T.W., *et al.* Collagen deposition in HIV-1 infected lymphatic tissues and T cell homeostasis. *J Clin Invest* **110**, 1133-1139 (2002).
